# Supplementary material for: A global assessment of cancer genomic alterations in epigenetic mechanisms
Source: Epigenetics Chromatin. 2014 Dec 4;7:29. doi: 10.1186/1756-8935-7-29 (PMC4258301; doi:10.1186/1756-8935-7-29)
Supplement: Supplementary file 1 — Additional file 1: Table S1: Four hundred and forty-one chromatin factors used in this study and their respective association with epigenetic protein families. (XLSX 30 KB) [file 13072_2014_339_MOESM1_ESM.xlsx]

## Sheet: t.csv
	HIST	BAH	BROMO	CHROMO	DNMT	HAT	HDAC_SIRT	PMT	KDM	MBD	MBT	PHD	PWWP	TET	chrom_remodel	chaperones	TUDOR	IDH
ACTA1															YES
ACTB															YES
ACTL6A															YES
ACTL6B															YES
ACTR5															YES
ACTR6															YES
ACTR8															YES
AIRE												YES
ARID1A															YES
ARID2															YES
ARID4A				YES													YES
ARID4B				YES													YES
ASH1L		YES	YES					YES				YES
ASH2L												YES
ASXL1												YES
ASXL2												YES
ASXL3												YES
ATAD2			YES
ATAD2B			YES
ATAT1						YES
BAHCC1		YES
BAHD1		YES
BAZ1A			YES									YES			YES
BAZ1B			YES									YES
BAZ2A			YES							YES		YES
BAZ2B			YES							YES		YES
BPTF			YES									YES			YES
BRD1			YES									YES	YES
BRD2			YES
BRD3			YES
BRD4			YES
BRD7			YES
BRD8			YES												YES
BRD9			YES
BRDT			YES
BRPF1			YES									YES	YES
BRPF3			YES									YES	YES
BRWD1			YES
BRWD3			YES
CAMKMT								YES
CARM1								YES
CBX1				YES
CBX2				YES
CBX3				YES
CBX4				YES
CBX5				YES
CBX6				YES
CBX7				YES
CBX8				YES
CDY1				YES
CDY1B				YES
CDY2A				YES
CDY2B				YES
CDYL				YES
CDYL2				YES
CECR2			YES
CHD1				YES											YES
CHD2				YES											YES
CHD3				YES								YES			YES
CHD4				YES								YES			YES
CHD5				YES								YES			YES
CHD6				YES
CHD7				YES
CHD8				YES
CHD9				YES
CHRAC1															YES
CLOCK						YES
CREBBP			YES			YES
CXXC1												YES
DIDO1												YES
DMAP1															YES
DNMT1		YES			YES
DNMT3A					YES							YES	YES
DNMT3B					YES								YES
DNMT3L					YES
DOT1L								YES
DPF1												YES
DPF2												YES
DPF3												YES
EHMT1								YES
EHMT2								YES
ELP3						YES
EP300			YES			YES
EP400															YES
EPC1															YES
EPC2															YES
EZH1								YES
EZH2								YES
GATAD2A															YES
GATAD2B															YES
GLYR1													YES
GTF3C4						YES
HAT1						YES
HDAC1							YES								YES
HDAC10							YES
HDAC11							YES
HDAC2							YES								YES
HDAC3							YES
HDAC4							YES
HDAC5							YES
HDAC6							YES
HDAC7							YES
HDAC8							YES
HDAC9							YES
HDGF													YES
HDGFL1													YES
HDGFRP2													YES
IDH1																		YES
IDH2																		YES
ING1												YES
ING2												YES
ING3												YES			YES
ING4												YES
ING5												YES
INO80															YES
INO80B															YES
INO80C															YES
INTS12												YES
JARID2									YES
JHDM1D									YES			YES
JMJD1C									YES
JMJD5									YES
KAT2A			YES			YES
KAT2B			YES			YES
KAT5				YES		YES									YES
KDM1A									YES
KDM1B									YES
KDM2A									YES			YES
KDM2B									YES			YES
KDM3A									YES
KDM3B									YES
KDM4A									YES			YES					YES
KDM4B									YES			YES					YES
KDM4C									YES			YES					YES
KDM4D									YES
KDM4DL									YES
KDM5A									YES			YES
KDM5B									YES			YES
KDM5C									YES			YES
KDM5D									YES			YES
KDM6A									YES
KDM6B									YES
KIAA1045												YES
KIAA2026			YES
L3MBTL											YES
L3MBTL2											YES
L3MBTL3											YES
L3MBTL4											YES
MBD1										YES
MBD2										YES
MBD3										YES					YES
MBD4										YES
MBD5										YES			YES
MBD6										YES
MBTD1											YES
MEAF6															YES
MECOM								YES
MECP2										YES
METTL21D								YES
MINA									YES
MLL			YES					YES				YES
MLL2								YES				YES
MLL3								YES				YES
MLL4								YES				YES
MLL5								YES				YES
MLLT10												YES
MLLT6												YES
MORF4L1				YES											YES
MORF4L2															YES
MPHOSPH8				YES
MRGBP															YES
MSH6													YES
MSL3L1				YES
MTA1		YES													YES
MTA2		YES													YES
MTA3		YES													YES
MTF2												YES					YES
MUM1													YES
MYST1				YES		YES
MYST2						YES
MYST3						YES						YES
MYST4						YES						YES
NCOA1						YES
NCOA3						YES
NO66									YES
NSD1								YES				YES	YES
ORC1		YES
PBRM1		YES	YES												YES
PHF1												YES					YES
PHF10												YES
PHF11												YES
PHF12												YES
PHF13												YES
PHF14												YES
PHF15												YES
PHF16												YES
PHF17												YES
PHF19												YES					YES
PHF2									YES			YES
PHF20												YES					YES
PHF20L1												YES					YES
PHF21A												YES
PHF21B												YES
PHF23												YES
PHF3												YES
PHF6												YES
PHF7												YES
PHF8									YES			YES
PHIP			YES
PHRF1												YES
POLE3															YES
PRDM1								YES
PRDM10								YES
PRDM11								YES
PRDM12								YES
PRDM13								YES
PRDM14								YES
PRDM15								YES
PRDM16								YES
PRDM2								YES
PRDM4								YES
PRDM5								YES
PRDM6								YES
PRDM7								YES
PRDM8								YES
PRDM9								YES
PRMT1								YES
PRMT2								YES
PRMT3								YES
PRMT5								YES
PRMT6								YES
PRMT7								YES
PRMT8								YES
PSIP1													YES
PWWP2B													YES
PYGO1												YES
PYGO2												YES
Q6ZW69								YES
RAG2												YES
RAI1												YES
RBBP4															YES
RBBP7															YES
RERE		YES
RSF1												YES
RUVBL1															YES
RUVBL2															YES
SCMH1											YES
SCML2											YES
SETD1A								YES
SETD1B								YES
SETD2								YES
SETD3								YES
SETD4								YES
SETD5								YES
SETD6								YES
SETD7								YES
SETD8								YES
SETDB1								YES		YES							YES
SETDB2								YES		YES
SETMAR								YES
SFMBT1											YES
SFMBT2											YES
SHPRH												YES
SIRT1							YES
SIRT2							YES
SIRT3							YES
SIRT4							YES
SIRT5							YES
SIRT6							YES
SIRT7							YES
SMARCA1															YES
SMARCA2			YES												YES
SMARCA4			YES												YES
SMARCA5															YES
SMARCB1															YES
SMARCC1				YES											YES
SMARCC2				YES											YES
SMARCD1															YES
SMARCD2															YES
SMARCD3															YES
SMARCE1															YES
SMYD1								YES
SMYD2								YES
SMYD3								YES
SMYD4								YES
SMYD5								YES
SP100			YES									YES
SP110			YES									YES
SP140			YES									YES
SP140L			YES									YES
SRCAP															YES
SUV39H1				YES				YES
SUV39H2				YES				YES
SUV420H1								YES
SUV420H2								YES
TAF1			YES			YES
TAF1L			YES			YES
TAF3												YES
TCF19												YES
TCF20												YES
TET1														YES
TET2														YES
TET3														YES
TNRC18		YES
TRDMT1					YES
TRIM24			YES									YES
TRIM28			YES									YES
TRIM33			YES									YES
TRIM66			YES									YES
TRRAP															YES
UBR7												YES
UHRF1												YES					YES
UHRF2												YES					YES
UTY									YES
VPS72															YES
WHSC1								YES				YES	YES
WHSC1L1								YES				YES	YES
YEATS4															YES
ZCWPW1													YES
ZCWPW2													YES
ZMYND11			YES									YES	YES
ZMYND8			YES									YES	YES
APLF																YES
ASF1A																YES
ASF1B																YES
CHAF1A																YES
CHAF1B																YES
DAXX																YES
DEK																YES
FACT																YES
HIRA																YES
HJURP																YES
NAP1L1																YES
NASP																YES
SSRP1																YES
SUPT16H																YES
ATRX															YES
H1F0	YES
H1FNT	YES
H1FOO	YES
H1FX	YES
H2AFB1	YES
H2AFB2	YES
H2AFB3	YES
H2AFJ	YES
H2AFV	YES
H2AFX	YES
H2AFY	YES
H2AFY2	YES
H3F3A	YES
H3F3B	YES
H3F3C	YES
H2AFZ	YES														YES
H2BFM	YES
H2BFS	YES
H2BFWT	YES
HIST1H1A	YES
HIST1H1B	YES
HIST1H1C	YES
HIST1H1D	YES
HIST1H1E	YES
HIST1H1T	YES
HIST1H2AA	YES
HIST1H2AB	YES
HIST1H2AC	YES
HIST1H2AD	YES
HIST1H2AE	YES
HIST1H2AG	YES
HIST1H2AI	YES
HIST1H2AJ	YES
HIST1H2AK	YES
HIST1H2AL	YES
HIST1H2AM	YES
HIST1H2BA	YES
HIST1H2BB	YES
HIST1H2BC	YES
HIST1H2BD	YES
HIST1H2BE	YES
HIST1H2BF	YES
HIST1H2BG	YES
HIST1H2BH	YES
HIST1H2BI	YES
HIST1H2BJ	YES
HIST1H2BK	YES
HIST1H2BL	YES
HIST1H2BM	YES
HIST1H2BN	YES
HIST1H2BO	YES
HIST1H3A	YES
HIST1H3B	YES
HIST1H3C	YES
HIST1H3D	YES
HIST1H3E	YES
HIST1H3F	YES
HIST1H3G	YES
HIST1H3H	YES
HIST1H3I	YES
HIST1H3J	YES
HIST1H4A	YES
HIST1H4B	YES
HIST1H4C	YES
HIST1H4D	YES
HIST1H4E	YES
HIST1H4F	YES
HIST1H4G	YES
HIST1H4H	YES
HIST1H4I	YES
HIST1H4J	YES
HIST1H4K	YES
HIST1H4L	YES
HIST2H2AA3	YES
HIST2H2AC	YES
HIST2H2BE	YES
HIST2H3C	YES
HIST3H3	YES
HIST4H4	YES
SETD9								YES
AKAP1																	YES
CCDC101																	YES
FMR1																	YES
FXR1																	YES
FXR2																	YES
LBR																	YES
LOC100129278																	YES
RNF17																	YES
SMN1																	YES
SMN2																	YES
SMNDC1																	YES
SND1																	YES
STK31																	YES
TDRD1																	YES
TDRD10																	YES
TDRD12																	YES
TDRD3																	YES
TDRD5																	YES
TDRD6																	YES
TDRD7																	YES
TDRD9																	YES
TDRKH																	YES
TP53BP1																	YES
ZGPAT																	YES
