# Supplementary material for: A global assessment of cancer genomic alterations in epigenetic mechanisms
Source: Epigenetics Chromatin. 2014 Dec 4;7:29. doi: 10.1186/1756-8935-7-29 (PMC4258301; doi:10.1186/1756-8935-7-29)
Supplement: Supplementary file 5 — Additional file 5: Table S2: Co-occurring and mutually exclusive mutations. First tab: all genes. Second tab: focused on ATRX, IDH1, TP53, PTEN, and EGFR in LGG and GBM. (XLSX 3 MB) [file 13072_2014_339_MOESM5_ESM.xlsx]

## Sheet: ALL GENES
gene_1	gene_2	chrom factor	disease	mut1 not 2	mut2 not 1	mut1 and 2	mut not1 not2	fisher p value	odds ratio	min ci	max ci
TP53	ATRX	+	LGG	25	4	76	98	1.95e-28	74.48	3.21335	5.40771
IDH1	ATRX	+	GBM	3	4	12	269	1.48e-15	269	3.98992	7.1995
BRAF	NRAS		THCA	235.5	34.5	0.5	127.5	5.16e-15	0.0078464	-7.64788	-2.04752
TP53	PTEN		UCEC	46	75	8	24	3.1e-13	0.0556522	-3.76898	-2.00829
TP53	CTNNB1		UCEC	53	52	1	47	5.58e-12	0.0170537	-6.08874	-2.05404
TP53	CIC		LGG	100	34	1	68	9.08e-11	0.02	-5.92436	-1.89969
TP53	IDH1	+	GBM	67.5	0.5	15.5	206.5	2.43e-09	94.837	1.72257	7.38175
CDH1	TP53		BRCA	85	263	5	545	3.86e-09	0.121897	-3.01846	-1.1907
IDH1	EGFR	+	LGG	149	15	1	38	4.4e-09	0.0170022	-6.12979	-2.01903
TP53	IDH1	+	LGG	9	58	92	44	2.23e-08	7.75479	1.25955	2.83707
CASP8	HRAS		HNSC	17	2	8	249	5.75e-08	58.5882	2.44499	5.69608
IDH1	ATRX	+	LGG	75	5	75	48	6.95e-08	9.6	1.28668	3.23685
TP53	CDKN2A		HNSC	138	2	56	80	7.36e-08	16.2319	1.34988	4.22408
ATP2A1	MAPRE3		BRCA	7	2	4	885	1.82e-07	252.857	3.67963	7.38602
ZNF440	RALGAPA1		HNSC	2	1	4	269	3.15e-07	538	3.69227	8.88345
MAPK4	C4orf31		HNSC	1	2	4	269	3.15e-07	538	3.69227	8.88345
KRAS	EGFR		Lung Adenocarcinoma	58.5	28.5	0.5	73.5	6.72e-07	0.0220423	-6.63187	-0.997715
IDH1	PTEN	+	LGG	150.5	10.5	0.5	43.5	7.46e-07	0.0137636	-7.1428	-1.42864
PLXND1	GLYR1	+	BRCA	2	2	3	891	8.29e-07	668.25	4.2405	8.76883
CTNNB1	DDX3X		Pediatric Brain Tumors	7	2	8	85	1.15e-06	48.5714	2.15243	5.61364
CEP170	F5		BRCA	4	8	4	882	1.25e-06	110.25	3.15183	6.25367
LOC441666	IGF2R		KIRC	7	1	4	404	1.32e-06	230.857	3.12656	7.75703
TP53	ARID1A	+	UCEC	51	40	3	59	1.42e-06	0.0867647	-3.67623	-1.21289
ATRX	CIC	+	LGG	78	33	2	90	2.01e-06	0.0699301	-4.11942	-1.2011
FUBP1	CIC		LGG	5	24	11	163	2.15e-06	14.9417	1.56346	3.84485
HRAS	BRAF		THCA	14.5	235.5	0.5	147.5	2.38e-06	0.0215975	-6.66192	-1.00843
MUC4	Unknown		KIRC	27	114	47	228	2.73e-06	3.48148	0.723468	1.77145
NIN	OXR1		BRCA	4	2	3	889	2.89e-06	333.375	3.76818	7.85036
PIK3R1	PIK3CA		UCEC	33	69	8	43	3.56e-06	0.151076	-2.75115	-1.02879
GATA3	TP53		BRCA	64	263	5	566	3.66e-06	0.168132	-2.70482	-0.861192
DNAH7	PIK3C2B		HNSC	13	1	5	257	3.84e-06	98.8462	2.37537	6.81176
SDHAP2	ZCCHC3		HNSC	6	1	4	265	4.36e-06	176.667	2.83829	7.51024
SDHAP2	RGS22		HNSC	6	1	4	265	4.36e-06	176.667	2.83829	7.51024
MAP1A	TMEM121		HNSC	6	1	4	265	4.36e-06	176.667	2.83829	7.51024
LOC646214	TUFT1		HNSC	6	1	4	265	4.36e-06	176.667	2.83829	7.51024
IGSF10	COL15A1		BRCA	5	2	3	888	4.62e-06	266.4	3.59151	7.57848
CDC42BPA	OGDHL		BRCA	5	2	3	888	4.62e-06	266.4	3.59151	7.57848
LRRIQ1	PIK3CB		BRCA	5	2	3	888	4.62e-06	266.4	3.59151	7.57848
MUC4	NEFH		KIRC	65	2	9	340	4.73e-06	23.5385	1.60363	4.71364
MUC16	ADAMTS16		COADREAD	14	1	6	165	4.78e-06	70.7143	2.07243	6.44487
SPAG17	CDH10		HNSC	1	14	5	256	5.19e-06	91.4286	2.30212	6.729
FNDC4	SMTN		BRCA	3	4	3	888	5.76e-06	222	3.52497	7.28039
PLXNB3	MYO16		BRCA	4	3	3	888	5.76e-06	222	3.52497	7.28039
SZT2	EXOC6		BRCA	4	3	3	888	5.76e-06	222	3.52497	7.28039
PDE1C	ZNF804A		HNSC	1	7	4	264	6.83e-06	150.857	2.70001	7.33266
ABCA12	DNAH7		BRCA	2	6	3	887	6.91e-06	221.75	3.44045	7.36266
LAMA2	ZCCHC11		BRCA	6	2	3	887	6.91e-06	221.75	3.44045	7.36266
ELL2	UBE4B		BRCA	2	6	3	887	6.91e-06	221.75	3.44045	7.36266
DOCK4	KCNB2		STAD	2	2	4	157	7.41e-06	157	2.85932	7.25317
LRP2	PARP8		BRCA	17	3	4	874	7.43e-06	68.549	2.65551	5.79959
TNIK	MICALCL		HNSC	5	2	4	265	7.76e-06	106	2.74928	6.5776
POLQ	PRKDC		HNSC	6	5	5	260	8.24e-06	43.3333	2.28849	5.24936
CCDC136	UBXN11		BRCA	5	3	3	887	9.19e-06	177.4	3.35256	7.00425
C1QTNF5	MAPRE3		BRCA	5	3	3	887	9.19e-06	177.4	3.35256	7.00425
VWA3A	SOGA1		BRCA	5	3	3	887	9.19e-06	177.4	3.35256	7.00425
ATN1	FAM157B		BRCA	4	15	4	875	9.55e-06	58.3333	2.58925	5.5431
DCAF4L2	CNTN6		HNSC	3	4	4	265	9.99e-06	88.3333	2.68784	6.27439
PPP1R9A	DCHS1		HNSC	3	4	4	265	9.99e-06	88.3333	2.68784	6.27439
BIRC6	DMD		HNSC	4	14	6	252	1.17e-05	27	1.92095	4.67072
RNF123	BCOR		BRCA	3	6	3	886	1.38e-05	147.667	3.20452	6.7854
CDK5RAP1	PREX2		BRCA	3	6	3	886	1.38e-05	147.667	3.20452	6.7854
TP53	PIK3CA		BRCA	212	223	56	407	1.38e-05	0.482105	-1.06632	-0.392864
IDH1	IDH2	+	LGG	150.5	8.5	0.5	45.5	1.42e-05	0.0177839	-6.90089	-1.15803
MAP3K1	TP53		BRCA	59	263	5	571	1.49e-05	0.183992	-2.6174	-0.768328
PHKA2	PHF8	+	BRCA	5	4	3	886	1.6e-05	132.9	3.15363	6.62557
PXDNL	CDH11		STAD	7	2	5	151	1.61e-05	53.9286	2.18118	5.79414
SFRS15	FOXD4L4		KIRC	3	2	3	408	1.66e-05	204	3.19886	7.43738
ARHGAP31	MYH11		KIRC	2	3	3	408	1.66e-05	204	3.19886	7.43738
CDH10	DPP6		HNSC	14	2	5	255	1.74e-05	45.5357	2.09264	5.54435
CUBN	ATP10B		BRCA	9	9	4	876	1.77e-05	43.2593	2.4187	5.11572
F5	ADCY2		HNSC	3	5	4	264	1.78e-05	70.4	2.51528	5.9931
RC3H1	UNC5C		HNSC	3	5	4	264	1.78e-05	70.4	2.51528	5.9931
MYH10	PRKD1		HNSC	5	3	4	264	1.78e-05	70.4	2.51528	5.9931
ZNF211	FAM184A		HNSC	3	5	4	264	1.78e-05	70.4	2.51528	5.9931
ERBB4	CADPS2		HNSC	5	3	4	264	1.78e-05	70.4	2.51528	5.9931
DNAH10	TANC1		HNSC	5	3	4	264	1.78e-05	70.4	2.51528	5.9931
DNAH5	UNC79		BRCA	7	3	3	885	1.96e-05	126.429	3.07497	6.60439
ANO4	PDE10A		HNSC	4	4	4	264	1.98e-05	66	2.48796	5.89135
BNC1	SVEP1		OV	2	2	3	305	1.98e-05	228.75	3.16664	7.69862
ZEB2	ZNF804A		STAD	5	1	4	155	2.06e-05	124	2.45488	7.18568
PIK3CA	PTEN		STAD	17	1	6	141	2.51e-05	49.7647	1.73128	6.08333
FLT3	CACNA1D		GBM	2	2	3	281	2.51e-05	210.75	3.08444	7.6169
LRRK2	ADAMTS12		STAD	8	2	5	150	2.59e-05	46.875	2.06005	5.63492
CD97	FLG2		BRCA	3	8	3	884	2.69e-05	110.5	2.95985	6.45018
HEG1	VPS13C		BRCA	3	8	3	884	2.69e-05	110.5	2.95985	6.45018
SETDB1	MAPRE3	+	BRCA	8	3	3	884	2.69e-05	110.5	2.95985	6.45018
FAT1	CASP8		HNSC	48	10	15	203	2.75e-05	6.34375	0.987689	2.70725
NLRP13	HGF		HNSC	2	2	3	269	2.85e-05	201.75	3.04066	7.5734
AMY2B	ASTE1		HNSC	2	2	3	269	2.85e-05	201.75	3.04066	7.5734
TRIM58	FAM75C1		HNSC	2	2	3	269	2.85e-05	201.75	3.04066	7.5734
SNTG1	OR5H14		HNSC	2	2	3	269	2.85e-05	201.75	3.04066	7.5734
CXXC1	ELP4	+	HNSC	2	2	3	269	2.85e-05	201.75	3.04066	7.5734
OR5D13	TARP		HNSC	2	2	3	269	2.85e-05	201.75	3.04066	7.5734
CYP2R1	PRICKLE2		HNSC	2	2	3	269	2.85e-05	201.75	3.04066	7.5734
ANKRD26	GCC2		HNSC	2	2	3	269	2.85e-05	201.75	3.04066	7.5734
CEP250	ODZ3		HNSC	2	2	3	269	2.85e-05	201.75	3.04066	7.5734
KIAA0922	ARHGAP5		HNSC	2	2	3	269	2.85e-05	201.75	3.04066	7.5734
FOSL2	ST6GAL2		HNSC	2	2	3	269	2.85e-05	201.75	3.04066	7.5734
ACIN1	KIAA0100		HNSC	2	2	3	269	2.85e-05	201.75	3.04066	7.5734
MTUS2	EYS		KIRC	2	4	3	407	2.9e-05	152.625	2.98564	7.07033
CNTNAP5	PHF3	+	HNSC	6	3	4	263	2.95e-05	58.4444	2.36637	5.76978
SLC15A5	UTRN		BRCA	2	11	3	882	2.97e-05	120.273	2.90431	6.67521
FSCB	SLC6A5		HNSC	8	2	4	262	2.99e-05	65.5	2.34464	6.01946
RYR3	NLRP7		HNSC	16	2	5	253	3e-05	39.5312	1.96116	5.39302
SPEF2	ALMS1		STAD	4	2	4	155	3.39e-05	77.5	2.38397	6.31659
ARID1B	NOTCH4		BRCA	7	4	3	884	3.41e-05	94.7143	2.87931	6.22241
ADAMTSL1	SMTN		BRCA	7	4	3	884	3.41e-05	94.7143	2.87931	6.22241
REV3L	SH3BP4		HNSC	5	4	4	263	3.51e-05	52.6	2.31841	5.60702
SHANK2	ZAN		HNSC	4	5	4	263	3.51e-05	52.6	2.31841	5.60702
PCNXL2	TPTE		BRCA	9	3	3	883	3.58e-05	98.1111	2.85629	6.31592
F8	KIDINS220		BRCA	9	3	3	883	3.58e-05	98.1111	2.85629	6.31592
MUC16	DIDO1	+	OV	14	1	4	293	3.81e-05	83.7143	2.17142	6.6834
TG	PCDHGA1		BRCA	6	5	3	884	3.81e-05	88.4	2.84069	6.12305
TLR4	BNC2		STAD	9	2	5	149	3.98e-05	41.3889	1.95052	5.49551
TBC1D3P2	SATB2		HNSC	9	2	4	261	4.3e-05	58	2.2376	5.88329
RB1	SLC15A5		BRCA	13	2	3	880	4.55e-05	101.538	2.74929	6.49159
DPCR1	C20orf191		KIRC	5	2	3	406	4.62e-05	121.8	2.80761	6.79715
DNAH8	MAP3K9		PRAD	2	2	3	228	4.62e-05	171	2.87473	7.4086
ERBB2	LRRC41		BRCA	10	3	3	882	4.64e-05	88.2	2.76217	6.19704
ANKRD12	PCDHB18		BRCA	8	4	3	883	4.67e-05	82.7812	2.7653	6.06711
RAG1	ZNF844		GBM	2	3	3	280	5e-05	140	2.82136	7.06192
MUC12	ZBTB40		BRCA	37	2	4	855	5.28e-05	46.2162	2.10431	5.56235
MAP2	PEG3		STAD	4	6	5	150	5.34e-05	31.25	1.89457	4.98947
TP53	RB1		GBM	66	8	16	198	5.4e-05	6	0.898502	2.68502
RNF213	ARID4B	+	BRCA	7	5	3	883	5.42e-05	75.6857	2.71352	5.93966
NBAS	MYH7B		BRCA	5	7	3	883	5.42e-05	75.6857	2.71352	5.93966
LPA	NLRP13		HNSC	3	2	3	268	5.68e-05	134	2.77742	7.01826
SORL1	PCDH8		HNSC	2	3	3	268	5.68e-05	134	2.77742	7.01826
PTPN13	FBXO18		HNSC	2	3	3	268	5.68e-05	134	2.77742	7.01826
PTPRM	TACR3		HNSC	3	2	3	268	5.68e-05	134	2.77742	7.01826
MDC1	LAMA3		HNSC	2	3	3	268	5.68e-05	134	2.77742	7.01826
TIMELESS	CPXCR1		HNSC	2	3	3	268	5.68e-05	134	2.77742	7.01826
DLG5	ZBTB38		HNSC	3	2	3	268	5.68e-05	134	2.77742	7.01826
DRP2	BBS9		HNSC	3	2	3	268	5.68e-05	134	2.77742	7.01826
OR5D14	MCF2		HNSC	2	3	3	268	5.68e-05	134	2.77742	7.01826
MYPN	C12orf63		HNSC	2	3	3	268	5.68e-05	134	2.77742	7.01826
HIST1H2AA	SDK1	+	HNSC	2	3	3	268	5.68e-05	134	2.77742	7.01826
SLC19A3	ODZ3		HNSC	3	2	3	268	5.68e-05	134	2.77742	7.01826
C1orf101	MUC19		BRCA	6	6	3	883	5.69e-05	73.5833	2.69673	5.90011
ODZ4	ABCA9		BRCA	6	6	3	883	5.69e-05	73.5833	2.69673	5.90011
NLRP5	TSHZ2		GBM	8	3	4	273	5.76e-05	45.5	2.16387	5.47156
FAM155A	SVEP1		HNSC	4	6	4	262	5.79e-05	43.6667	2.17168	5.38149
BAI3	DIP2A		HNSC	4	6	4	262	5.79e-05	43.6667	2.17168	5.38149
RYR1	DACH2		STAD	5	2	4	154	6.04e-05	61.6	2.20377	6.03755
ST18	PROX1		HNSC	5	5	4	262	6.23e-05	41.92	2.15093	5.3206
MLL2	USH2A	+	KIRC	8	12	5	391	6.45e-05	20.3646	1.75742	4.27017
LRP1B	RIMBP2		HNSC	39	2	7	228	6.55e-05	20.4615	1.41077	4.62633
NBPF9	LOC650368		STAD	8	3	5	149	6.61e-05	31.0417	1.83694	5.03372
CDH9	COL24A1		HNSC	8	3	4	261	6.82e-05	43.5	2.11872	5.4268
LRFN5	VPS13B		OV	2	4	3	303	6.85e-05	113.625	2.68977	6.77604
GOLGA6L10	HGC6.3		KIRC	4	11	4	397	7.12e-05	36.0909	2.07617	5.09591
FAT3	MLL3	+	STAD	13	3	6	143	7.16e-05	22	1.59332	4.58876
RELN	KRTAP5-1		BRCA	12	3	3	880	7.34e-05	73.3333	2.59632	5.99371
TP53	PPP2R1A		UCEC	42	2	12	97	7.42e-05	13.8571	1.08867	4.16893
MYH11	ZNF831		BRCA	8	5	3	882	7.43e-05	66.15	2.60026	5.78359
EP300	PLCE1	+	HNSC	16	3	5	252	7.61e-05	26.25	1.74971	4.78562
PAPPA2	OR2M1P		HNSC	15	1	4	256	7.83e-05	68.2667	1.97106	6.47578
MDN1	UBN2		BRCA	16	2	3	877	7.84e-05	82.2188	2.55309	6.26567
SI	MDN1		HNSC	18	5	6	247	7.96e-05	16.4667	1.52167	4.08101
PXDNL	SLITRK2		STAD	8	1	4	152	7.98e-05	76	2.02694	6.63453
TG	GRM7		STAD	8	1	4	152	7.98e-05	76	2.02694	6.63453
CUBN	NALCN		BRCA	10	4	3	881	8.05e-05	66.075	2.56923	5.81235
CPAMD8	CD163L1		BRCA	7	6	3	882	8.09e-05	63	2.57025	5.71602
CPXCR1	ZNF536		HNSC	2	11	4	259	8.1e-05	47.0909	2.05062	5.65354
CXorf22	OR5W2		GBM	4	2	3	279	8.7e-05	104.625	2.60698	6.69379
PIK3CG	LTBP2		GBM	4	2	3	279	8.7e-05	104.625	2.60698	6.69379
AZGP1	FRYL		GBM	2	4	3	279	8.7e-05	104.625	2.60698	6.69379
HECW1	TMEM132D		GBM	2	4	3	279	8.7e-05	104.625	2.60698	6.69379
PLEKHG4B	JHDM1D	+	GBM	4	2	3	279	8.7e-05	104.625	2.60698	6.69379
PLCE1	CACNA1D		HNSC	4	7	4	261	8.98e-05	37.2857	2.04244	5.19478
HECTD4	JPH4		BRCA	17	2	3	876	9.21e-05	77.2941	2.49513	6.2001
TP53	CTCF		UCEC	54.5	20.5	0.5	79.5	9.31e-05	0.0355784	-6.16257	-0.509462
TP53	ATRX	+	GBM	70	4	12	202	9.6e-05	8.65714	0.994584	3.32219
APAF1	XIST		HNSC	3	9	4	260	9.76e-05	38.5185	2.01329	5.28899
SDK2	C9orf174		BRCA	9	5	3	881	9.86e-05	58.7333	2.49819	5.64783
SALL1	VCAN		BRCA	5	9	3	881	9.86e-05	58.7333	2.49819	5.64783
FAM75A6	SCN11A		HNSC	4	2	3	267	9.88e-05	100.125	2.56286	6.64998
FUT9	OR2M1P		HNSC	4	2	3	267	9.88e-05	100.125	2.56286	6.64998
KIF26B	ZNF521		HNSC	2	4	3	267	9.88e-05	100.125	2.56286	6.64998
MUSK	NLRP7		HNSC	2	4	3	267	9.88e-05	100.125	2.56286	6.64998
ACAN	PLCL1		HNSC	2	4	3	267	9.88e-05	100.125	2.56286	6.64998
ITPR2	ERCC5		HNSC	4	2	3	267	9.88e-05	100.125	2.56286	6.64998
SEMA3E	CNTN1		HNSC	4	2	3	267	9.88e-05	100.125	2.56286	6.64998
CXXC1	CLSTN2	+	HNSC	2	4	3	267	9.88e-05	100.125	2.56286	6.64998
FIGN	CD1E		HNSC	4	2	3	267	9.88e-05	100.125	2.56286	6.64998
PDZRN3	CNKSR2		HNSC	4	2	3	267	9.88e-05	100.125	2.56286	6.64998
ZNF347	MCF2L2		HNSC	4	2	3	267	9.88e-05	100.125	2.56286	6.64998
CDKL5	ZNF320		HNSC	2	4	3	267	9.88e-05	100.125	2.56286	6.64998
CMYA5	PRICKLE2		HNSC	4	2	3	267	9.88e-05	100.125	2.56286	6.64998
NCOR2	C7orf60		HNSC	4	2	3	267	9.88e-05	100.125	2.56286	6.64998
ADAMTS12	CUL3		HNSC	2	4	3	267	9.88e-05	100.125	2.56286	6.64998
OR8J3	RALGAPA1		HNSC	4	2	3	267	9.88e-05	100.125	2.56286	6.64998
ENPEP	CCDC144A		HNSC	4	2	3	267	9.88e-05	100.125	2.56286	6.64998
LOC651250	FAM83H		HNSC	4	2	3	267	9.88e-05	100.125	2.56286	6.64998
KRAS	ABCB1		STAD	6	2	4	153	9.96e-05	51	2.04859	5.81506
ZFPM2	CUX1		KIRC	4	4	3	405	9.99e-05	75.9375	2.53803	6.12179
TLR4	ELTD1		STAD	9	3	5	148	0.000101199	27.4074	1.72915	4.89248
CMYA5	EIF2C2		BRCA	11	4	3	880	0.000102059	60	2.48359	5.7051
FAT4	PTPRQ		BRCA	11	4	3	880	0.000102059	60	2.48359	5.7051
LEPR	MAP1A		HNSC	5	6	4	261	0.000102283	34.8	2.00569	5.09354
PAPPA2	DMD		HNSC	12	13	7	244	0.000102954	10.9487	1.30686	3.47959
USH2A	EPB41L3		HNSC	19	5	6	246	0.000103012	15.5368	1.46791	4.01852
NPM1	RUNX1		LAML	54.5	17.5	0.5	65.5	0.000104347	0.0343381	-6.20555	-0.537445
SMCR8	OBSCN		BRCA	2	18	3	875	0.000107257	72.9167	2.44022	6.13841
WASH3P	EXOC4		HNSC	12	2	4	258	0.000107395	43	1.96782	5.55458
SPTB	MYO5C		OV	5	2	3	302	0.000109005	90.6	2.51087	6.50204
DMXL2	CDH23		BRCA	6	8	3	881	0.00011066	55.0625	2.45755	5.55939
RAPGEF6	DNAH2		BRCA	6	8	3	881	0.00011066	55.0625	2.45755	5.55939
HECW2	KIF21B		BRCA	6	8	3	881	0.00011066	55.0625	2.45755	5.55939
SETDB1	FLNB	+	BRCA	8	6	3	881	0.00011066	55.0625	2.45755	5.55939
PIK3C2B	COL5A2		HNSC	3	3	3	267	0.000112567	89	2.52497	6.4523
NCAM2	PHACTR3		HNSC	3	3	3	267	0.000112567	89	2.52497	6.4523
TMEM132E	NCAM2		HNSC	3	3	3	267	0.000112567	89	2.52497	6.4523
PCDHB12	LAMA5		HNSC	3	3	3	267	0.000112567	89	2.52497	6.4523
TTC37	NCKAP5		HNSC	3	3	3	267	0.000112567	89	2.52497	6.4523
MC2R	LPPR4		HNSC	3	3	3	267	0.000112567	89	2.52497	6.4523
SLC5A7	CNTNAP2		GBM	3	10	4	271	0.000114534	36.1333	1.96263	5.2118
SLITRK6	SULF1		STAD	9	1	4	151	0.000114706	67.1111	1.91413	6.49857
FSIP2	ARID1B		BRCA	7	7	3	881	0.000114875	53.9388	2.44432	5.53138
MYH7B	SCN10A		BRCA	7	7	3	881	0.000114875	53.9388	2.44432	5.53138
BIRC6	KCNN3		BRCA	7	7	3	881	0.000114875	53.9388	2.44432	5.53138
USH2A	PCDH17		COAD	4	2	4	111	0.000116908	55.5	2.04757	5.98519
ENPP2	FAM135B		HNSC	1	17	4	254	0.000120175	59.7647	1.84473	6.3361
NSD1	OR8H2	+	HNSC	17	1	4	254	0.000120175	59.7647	1.84473	6.3361
DNAH9	PXDNL		BRCA	12	4	3	879	0.000127143	54.9375	2.4045	5.60789
RPGR	ANKAR		BRCA	12	4	3	879	0.000127143	54.9375	2.4045	5.60789
PEG3	GRM1		HNSC	11	6	5	254	0.000127417	19.2424	1.6256	4.28864
LOC650368	PCDH15		PRAD	8	3	4	220	0.000128547	36.6667	1.947	5.25674
FSCB	LPHN3		HNSC	8	4	4	260	0.000133127	32.5	1.92696	5.03552
CRB1	FSCB		HNSC	4	8	4	260	0.000133127	32.5	1.92696	5.03552
TRPM6	ZNF85		STAD	2	2	3	158	0.000133518	118.5	2.50633	7.04349
ESRRG	GRID2		STAD	2	2	3	158	0.000133518	118.5	2.50633	7.04349
LRP4	OR5T2		STAD	2	2	3	158	0.000133518	118.5	2.50633	7.04349
SETBP1	SPHKAP		STAD	2	2	3	158	0.000133518	118.5	2.50633	7.04349
CD1E	TRIML1		STAD	2	2	3	158	0.000133518	118.5	2.50633	7.04349
ZNF492	OR5L2		STAD	2	2	3	158	0.000133518	118.5	2.50633	7.04349
ARID1A	PRR12	+	KIRC	8	2	3	403	0.000134517	75.5625	2.40375	6.24617
TP53	USH2A		BRCA	249	11	19	619	0.000134677	4.2939	0.700189	2.2142
KIT	OTOF		OV	4	3	3	302	0.000135593	75.5	2.44419	6.20408
DHX37	SECISBP2L		KIRC	6	3	3	404	0.000136467	67.3333	2.41777	6.00154
GRM8	PAPPA		STAD	3	5	4	153	0.000137311	40.8	1.96674	5.45062
CHRM2	ZNF99		STAD	3	5	4	153	0.000137311	40.8	1.96674	5.45062
SCN10A	LOC647288		GBM	5	2	3	278	0.000138415	83.4	2.42778	6.41951
USH2A	PCDH17		COADREAD	6	3	4	173	0.000140475	38.4444	1.94528	5.35315
HMCN1	KIF13A		BRCA	20	2	3	873	0.000142336	65.475	2.33835	6.02498
GOLGA6L2	SRSF11		BRCA	20	2	3	873	0.000142336	65.475	2.33835	6.02498
GOLGA6L2	PPOX		BRCA	20	2	3	873	0.000142336	65.475	2.33835	6.02498
HECW1	DNAH11		BRCA	9	6	3	880	0.000146802	48.8889	2.35592	5.42318
ZNF536	FSCB		HNSC	10	7	5	254	0.000148299	18.1429	1.58816	4.20839
ELTD1	TRPA1		STAD	4	4	4	153	0.0001518	38.25	1.93935	5.34893
MXRA5	ROBO2		STAD	4	4	4	153	0.0001518	38.25	1.93935	5.34893
PTEN	CTNNB1		UCEC	43	13	40	57	0.000154706	4.07871	0.665319	2.14624
CTCF	TRIP11		BRCA	13	4	3	878	0.000155954	50.6538	2.33102	5.51901
FLNC	ITPR1		BRCA	7	8	3	880	0.000157023	47.1429	2.33203	5.37433
KCNN3	HEPH		HNSC	2	5	3	266	0.000157152	79.8	2.3835	6.37554
ACAN	HEPH		HNSC	2	5	3	266	0.000157152	79.8	2.3835	6.37554
ATP8A2	TRPM3		HNSC	2	5	3	266	0.000157152	79.8	2.3835	6.37554
AOC3	THOC2		HNSC	2	5	3	266	0.000157152	79.8	2.3835	6.37554
DSCAM	ZNF638		HNSC	5	2	3	266	0.000157152	79.8	2.3835	6.37554
TCIRG1	SLC5A7		HNSC	2	5	3	266	0.000157152	79.8	2.3835	6.37554
USP9X	WAPAL		HNSC	5	2	3	266	0.000157152	79.8	2.3835	6.37554
CXXC1	CNGB1	+	HNSC	2	5	3	266	0.000157152	79.8	2.3835	6.37554
OR6K2	PLCH1		HNSC	2	5	3	266	0.000157152	79.8	2.3835	6.37554
ANO4	SP4		HNSC	5	2	3	266	0.000157152	79.8	2.3835	6.37554
TGFBR2	AOC3		HNSC	5	2	3	266	0.000157152	79.8	2.3835	6.37554
CRB1	BBS9		HNSC	5	2	3	266	0.000157152	79.8	2.3835	6.37554
YSK4	INSC		HNSC	5	2	3	266	0.000157152	79.8	2.3835	6.37554
KIAA1462	CHST6		HNSC	5	2	3	266	0.000157152	79.8	2.3835	6.37554
KIAA1462	TOPBP1		HNSC	5	2	3	266	0.000157152	79.8	2.3835	6.37554
CYP4A11	KSR2		HNSC	2	5	3	266	0.000157152	79.8	2.3835	6.37554
GRIN3A	AMPH		HNSC	5	2	3	266	0.000157152	79.8	2.3835	6.37554
TPO	KIAA0947		HNSC	2	5	3	266	0.000157152	79.8	2.3835	6.37554
GSN	EFCAB6		HNSC	2	5	3	266	0.000157152	79.8	2.3835	6.37554
SLITRK3	HR		HNSC	5	2	3	266	0.000157152	79.8	2.3835	6.37554
UHRF1BP1L	KIAA1409		HNSC	2	5	3	266	0.000157152	79.8	2.3835	6.37554
MYH13	WAPAL		HNSC	5	2	3	266	0.000157152	79.8	2.3835	6.37554
MYO16	SORL1		HNSC	5	2	3	266	0.000157152	79.8	2.3835	6.37554
ZNF676	RPSAP58		HNSC	5	7	4	260	0.000158332	29.7143	1.8776	4.90566
FAT4	PCDH15		STAD	14	10	9	132	0.000159366	8.48571	1.08268	3.19409
LRRIQ3	KIF2B		STAD	1	10	4	150	0.000159754	60	1.81141	6.37727
TLR4	NDST4		STAD	10	1	4	150	0.000159754	60	1.81141	6.37727
CD1E	TLR4		STAD	1	10	4	150	0.000159754	60	1.81141	6.37727
WDR6	SDK1		STAD	1	10	4	150	0.000159754	60	1.81141	6.37727
SMAD4	UNC13A		STAD	10	1	4	150	0.000159754	60	1.81141	6.37727
FRG1B	CD1E		STAD	10	1	4	150	0.000159754	60	1.81141	6.37727
MUC4	NBPF9		KIRC	68	1	6	341	0.000160238	30.0882	1.27115	5.53712
SCN2A	SAGE1		BRCA	11	5	3	879	0.000161787	47.9455	2.32008	5.42005
ROS1	TG		OV	2	6	3	301	0.000162705	75.25	2.35756	6.28407
ARID1A	PTEN	+	STAD	13	2	5	145	0.000163089	27.8846	1.59282	5.06333
JUB	MUC6		HNSC	14	2	4	256	0.000178371	36.5714	1.81865	5.37989
APOB	FUT9		HNSC	11	3	4	258	0.000182952	31.2727	1.82873	5.05677
TNR	SFMBT2	+	COADREAD	3	2	3	178	0.00018489	89	2.3665	6.61077
TNS1	TGM4		COADREAD	3	2	3	178	0.00018489	89	2.3665	6.61077
CACNA1E	HIVEP1		BRCA	14	4	3	877	0.000188733	46.9821	2.26241	5.43713
AHNAK2	TUBA3C		GBM	15	2	4	267	0.000189969	35.6	1.79704	5.34765
LRRC4C	MAGEC1		HNSC	9	4	4	259	0.000189986	28.7778	1.82257	4.89664
FAT4	DACH2		STAD	18	1	5	141	0.000190852	39.1667	1.46542	5.87023
FAT4	ODZ3		STAD	18	1	5	141	0.000190852	39.1667	1.46542	5.87023
CASP8	EPHA2		HNSC	19	6	6	245	0.000193482	12.8947	1.33273	3.78091
MYO3A	DPYD		HNSC	4	3	3	266	0.000195357	66.5	2.3168	6.0776
PHACTR3	NINL		HNSC	3	4	3	266	0.000195357	66.5	2.3168	6.0776
PDGFRB	C10orf140		HNSC	4	3	3	266	0.000195357	66.5	2.3168	6.0776
PDGFRB	MEFV		HNSC	4	3	3	266	0.000195357	66.5	2.3168	6.0776
IL16	SEMA5B		HNSC	4	3	3	266	0.000195357	66.5	2.3168	6.0776
PHF3	NLRP3	+	HNSC	4	3	3	266	0.000195357	66.5	2.3168	6.0776
LRP12	OR2T12		HNSC	3	4	3	266	0.000195357	66.5	2.3168	6.0776
MED1	SORBS2		HNSC	3	4	3	266	0.000195357	66.5	2.3168	6.0776
ALPK3	MME		HNSC	4	3	3	266	0.000195357	66.5	2.3168	6.0776
LOC441666	HECTD1		HNSC	3	4	3	266	0.000195357	66.5	2.3168	6.0776
KIAA1199	GABRB2		HNSC	4	3	3	266	0.000195357	66.5	2.3168	6.0776
CDH12	NRK		HNSC	4	3	3	266	0.000195357	66.5	2.3168	6.0776
DLG5	PKDREJ		HNSC	3	4	3	266	0.000195357	66.5	2.3168	6.0776
NCOR2	PIK3R4		HNSC	4	3	3	266	0.000195357	66.5	2.3168	6.0776
DOCK7	TNRC6C		HNSC	4	3	3	266	0.000195357	66.5	2.3168	6.0776
SGK269	SCAND3		HNSC	3	4	3	266	0.000195357	66.5	2.3168	6.0776
TP53BP1	ITSN2	+	HNSC	4	3	3	266	0.000195357	66.5	2.3168	6.0776
OR8J3	ZNF440		HNSC	4	3	3	266	0.000195357	66.5	2.3168	6.0776
OR8J3	RPTOR		HNSC	4	3	3	266	0.000195357	66.5	2.3168	6.0776
ANKRD30B	SDHAP3		HNSC	3	4	3	266	0.000195357	66.5	2.3168	6.0776
TP53	LMTK2		BRCA	261.5	0.5	7.5	630.5	0.000199472	36.1663	0.721738	6.45452
LRP1B	IGSF10		STAD	20	2	6	137	0.000200647	20.55	1.35517	4.69055
FAT1	LAMB1		BRCA	12	5	3	878	0.000201381	43.9	2.24134	5.32249
NF1	HLA-DRB6		BRCA	12	5	3	878	0.000201381	43.9	2.24134	5.32249
LOC650368	CROCCL1		HNSC	17	7	6	246	0.000201625	12.4034	1.32187	3.71407
LAMA1	PEG3		GBM	6	2	3	277	0.000206516	69.25	2.27419	6.20126
FAT3	PCDH11X		GBM	2	6	3	277	0.000206516	69.25	2.27419	6.20126
FN1	CSMD1		COAD	2	5	4	110	0.00020748	44	1.8647	5.70368
CTNNB1	PCDH9		COAD	2	5	4	110	0.00020748	44	1.8647	5.70368
CCDC39	SPTA1		BRCA	2	23	3	870	0.000207896	56.7391	2.20195	5.87498
DST	ESPL1		BRCA	18	3	3	874	0.000211279	48.5556	2.21571	5.54971
LRP2	SLC4A3		BRCA	18	3	3	874	0.000211279	48.5556	2.21571	5.54971
LRP2	AMPD1		BRCA	18	3	3	874	0.000211279	48.5556	2.21571	5.54971
AFF2	C5orf42		BRCA	8	8	3	879	0.000214455	41.2031	2.22008	5.21695
SNTG2	TRPS1		STAD	1	11	4	149	0.000216707	54.1818	1.71704	6.26765
TPTE	TRHDE		STAD	11	1	4	149	0.000216707	54.1818	1.71704	6.26765
CUBN	FSTL5		STAD	9	4	5	147	0.000216898	20.4167	1.53929	4.49341
CTNND2	SEMA6D		STAD	6	3	4	152	0.000225361	33.7778	1.81496	5.22464
COL6A5	PRIC285		BRCA	15	4	3	876	0.000225713	43.8	2.19804	5.36122
OR4N2	TUBBP5		STAD	2	8	4	151	0.000229923	37.75	1.79065	5.47132
SOX5	ODZ1		OV	2	7	3	300	0.000231292	64.2857	2.22351	6.10317
LRRK2	PRUNE2		HNSC	8	5	4	259	0.000233945	25.9	1.76302	4.74547
MYH9	UGT2B10		HNSC	8	5	4	259	0.000233945	25.9	1.76302	4.74547
MAP2	BBS9		HNSC	6	2	3	265	0.000234417	66.25	2.22974	6.15713
TMEM146	MAP2		HNSC	2	6	3	265	0.000234417	66.25	2.22974	6.15713
CNOT1	MIR527		HNSC	6	2	3	265	0.000234417	66.25	2.22974	6.15713
MKI67	CIITA		HNSC	6	2	3	265	0.000234417	66.25	2.22974	6.15713
ZNF831	CD1E		HNSC	6	2	3	265	0.000234417	66.25	2.22974	6.15713
REV3L	SLC26A5		HNSC	6	2	3	265	0.000234417	66.25	2.22974	6.15713
ELTD1	NLRP8		HNSC	2	6	3	265	0.000234417	66.25	2.22974	6.15713
PKHD1	SPTBN4		HNSC	6	2	3	265	0.000234417	66.25	2.22974	6.15713
PKHD1	TMEM146		HNSC	6	2	3	265	0.000234417	66.25	2.22974	6.15713
PION	CUX1		HNSC	2	6	3	265	0.000234417	66.25	2.22974	6.15713
TAB1	ODZ2		HNSC	2	6	3	265	0.000234417	66.25	2.22974	6.15713
PRKD3	PTPRJ		HNSC	6	2	3	265	0.000234417	66.25	2.22974	6.15713
PROX1	PTGS1		HNSC	6	2	3	265	0.000234417	66.25	2.22974	6.15713
PROX1	TMEM200A		HNSC	6	2	3	265	0.000234417	66.25	2.22974	6.15713
DENND1A	DLG2		HNSC	2	6	3	265	0.000234417	66.25	2.22974	6.15713
MYO18B	ENPP2		HNSC	6	2	3	265	0.000234417	66.25	2.22974	6.15713
MYBPC1	MTMR8		HNSC	6	2	3	265	0.000234417	66.25	2.22974	6.15713
ACSS3	PDE1C		HNSC	6	2	3	265	0.000234417	66.25	2.22974	6.15713
RIMBP2	CHRD		HNSC	6	2	3	265	0.000234417	66.25	2.22974	6.15713
DNAH10	SPG11		HNSC	6	2	3	265	0.000234417	66.25	2.22974	6.15713
C15orf2	PCDHGB3		HNSC	6	2	3	265	0.000234417	66.25	2.22974	6.15713
BAI3	COL5A3		OV	4	4	3	301	0.00023497	56.4375	2.24034	5.82592
DMD	SPTA1		HNSC	15	5	5	251	0.000239547	16.7333	1.47276	4.16204
TTN	OTOP2		BRCA	118	1	5	774	0.000239732	32.7966	1.33453	5.64612
UTRN	C20orf26		BRCA	11	6	3	878	0.000240441	39.9091	2.17849	5.19472
SYNE2	NFASC		BRCA	11	6	3	878	0.000240441	39.9091	2.17849	5.19472
GRIN2B	DNAH11		HNSC	6	13	5	252	0.000240517	16.1538	1.47092	4.09339
CTNND2	FUT9		HNSC	12	3	4	257	0.000241718	28.5556	1.74685	4.95685
CTNND2	KIAA1109		HNSC	12	3	4	257	0.000241718	28.5556	1.74685	4.95685
NUAK1	PTPRJ		BRCA	3	3	2	890	0.000246631	197.778	3.16908	7.40521
JPH4	GLYR1	+	BRCA	3	3	2	890	0.000246631	197.778	3.16908	7.40521
KCNB1	ZBTB4		BRCA	3	3	2	890	0.000246631	197.778	3.16908	7.40521
C20orf112	ADAM23		BRCA	3	3	2	890	0.000246631	197.778	3.16908	7.40521
DGKK	DZIP1L		BRCA	3	3	2	890	0.000246631	197.778	3.16908	7.40521
KCNB2	PRTG		BRCA	3	3	2	890	0.000246631	197.778	3.16908	7.40521
MYT1	CNTNAP1		BRCA	3	3	2	890	0.000246631	197.778	3.16908	7.40521
CCDC87	UTP14A		BRCA	3	3	2	890	0.000246631	197.778	3.16908	7.40521
KCNQ3	POLG		BRCA	3	3	2	890	0.000246631	197.778	3.16908	7.40521
IL1RL2	SMG5		BRCA	3	3	2	890	0.000246631	197.778	3.16908	7.40521
ATP2B4	RNF111		BRCA	3	3	2	890	0.000246631	197.778	3.16908	7.40521
ATP2B4	CASC4		BRCA	3	3	2	890	0.000246631	197.778	3.16908	7.40521
MMP16	BAX		BRCA	3	3	2	890	0.000246631	197.778	3.16908	7.40521
DOPEY2	PNMAL1		BRCA	3	3	2	890	0.000246631	197.778	3.16908	7.40521
HJURP	RRNAD1	+	BRCA	3	3	2	890	0.000246631	197.778	3.16908	7.40521
HJURP	SLITRK3	+	BRCA	3	3	2	890	0.000246631	197.778	3.16908	7.40521
HJURP	PLCZ1	+	BRCA	3	3	2	890	0.000246631	197.778	3.16908	7.40521
SGSM1	SLCO1B7		BRCA	3	3	2	890	0.000246631	197.778	3.16908	7.40521
CPNE4	EPB41L3		BRCA	3	3	2	890	0.000246631	197.778	3.16908	7.40521
HOXB3	RTN3		BRCA	3	3	2	890	0.000246631	197.778	3.16908	7.40521
ARHGAP29	TSC2		BRCA	3	3	2	890	0.000246631	197.778	3.16908	7.40521
ARHGAP11A	ECE2		BRCA	3	3	2	890	0.000246631	197.778	3.16908	7.40521
EIF4G3	MYLK		BRCA	3	3	2	890	0.000246631	197.778	3.16908	7.40521
PIK3C2G	FRMPD2		BRCA	3	3	2	890	0.000246631	197.778	3.16908	7.40521
ATG9B	MCM3AP		BRCA	3	3	2	890	0.000246631	197.778	3.16908	7.40521
NLRP5	PRTG		BRCA	3	3	2	890	0.000246631	197.778	3.16908	7.40521
FATE1	FXYD3		BRCA	3	3	2	890	0.000246631	197.778	3.16908	7.40521
FAM71B	NLRP12		BRCA	3	3	2	890	0.000246631	197.778	3.16908	7.40521
BRIP1	FAM71B		BRCA	3	3	2	890	0.000246631	197.778	3.16908	7.40521
C15orf39	JPH4		BRCA	3	3	2	890	0.000246631	197.778	3.16908	7.40521
INTS4L2	UMODL1		BRCA	3	3	2	890	0.000246631	197.778	3.16908	7.40521
MARK1	IL6ST		BRCA	3	3	2	890	0.000246631	197.778	3.16908	7.40521
DNMBP	OGDHL		BRCA	3	3	2	890	0.000246631	197.778	3.16908	7.40521
MAP3K12	MCM3AP		BRCA	3	3	2	890	0.000246631	197.778	3.16908	7.40521
MAP3K12	VILL		BRCA	3	3	2	890	0.000246631	197.778	3.16908	7.40521
CACNA1S	ZMIZ1		BRCA	3	3	2	890	0.000246631	197.778	3.16908	7.40521
FSHR	CNTNAP1		BRCA	3	3	2	890	0.000246631	197.778	3.16908	7.40521
DSE	THADA		BRCA	3	3	2	890	0.000246631	197.778	3.16908	7.40521
SLC15A5	ASAP1		BRCA	3	3	2	890	0.000246631	197.778	3.16908	7.40521
RNF40	AR		BRCA	3	3	2	890	0.000246631	197.778	3.16908	7.40521
FLII	PIP5K1C		BRCA	3	3	2	890	0.000246631	197.778	3.16908	7.40521
GRIN3A	FAM86C2P		BRCA	3	3	2	890	0.000246631	197.778	3.16908	7.40521
PPP1R3A	STXBP5		BRCA	3	3	2	890	0.000246631	197.778	3.16908	7.40521
NCKAP5	HJURP	+	BRCA	3	3	2	890	0.000246631	197.778	3.16908	7.40521
PHACTR1	SORBS2		BRCA	3	3	2	890	0.000246631	197.778	3.16908	7.40521
CFTR	MED13		BRCA	3	3	2	890	0.000246631	197.778	3.16908	7.40521
XDH	DDX21		BRCA	3	3	2	890	0.000246631	197.778	3.16908	7.40521
MAGEC3	ERN2		BRCA	3	3	2	890	0.000246631	197.778	3.16908	7.40521
MAGEC3	PTENP1		BRCA	3	3	2	890	0.000246631	197.778	3.16908	7.40521
CASR	RPTN		BRCA	3	3	2	890	0.000246631	197.778	3.16908	7.40521
EML6	CDH26		BRCA	3	3	2	890	0.000246631	197.778	3.16908	7.40521
EML6	ARHGAP11A		BRCA	3	3	2	890	0.000246631	197.778	3.16908	7.40521
SF3B4	TRPC4		BRCA	3	3	2	890	0.000246631	197.778	3.16908	7.40521
ATG2B	FLII		BRCA	3	3	2	890	0.000246631	197.778	3.16908	7.40521
LCMT2	LINC00281		BRCA	3	3	2	890	0.000246631	197.778	3.16908	7.40521
IQSEC1	STXBP5		BRCA	3	3	2	890	0.000246631	197.778	3.16908	7.40521
HPSE	CEP68		BRCA	3	3	2	890	0.000246631	197.778	3.16908	7.40521
WWC1	CASC4		BRCA	3	3	2	890	0.000246631	197.778	3.16908	7.40521
POLD1	NLRP4		BRCA	3	3	2	890	0.000246631	197.778	3.16908	7.40521
ZNRD1-AS1	FRMPD2		BRCA	3	3	2	890	0.000246631	197.778	3.16908	7.40521
ZNRD1-AS1	PIK3C2G		BRCA	3	3	2	890	0.000246631	197.778	3.16908	7.40521
SYBU	HIST1H2BC	+	BRCA	3	3	2	890	0.000246631	197.778	3.16908	7.40521
CSE1L	ZNRD1-AS1		BRCA	3	3	2	890	0.000246631	197.778	3.16908	7.40521
CSE1L	UBN2		BRCA	3	3	2	890	0.000246631	197.778	3.16908	7.40521
ACVR1B	PHACTR1		BRCA	3	3	2	890	0.000246631	197.778	3.16908	7.40521
ACVR1B	GPR179		BRCA	3	3	2	890	0.000246631	197.778	3.16908	7.40521
KCTD3	ATP2B4		BRCA	3	3	2	890	0.000246631	197.778	3.16908	7.40521
DZANK1	XKR4		BRCA	3	3	2	890	0.000246631	197.778	3.16908	7.40521
TBC1D8	C15orf55		BRCA	3	3	2	890	0.000246631	197.778	3.16908	7.40521
HDAC2	SLX4	+	BRCA	3	3	2	890	0.000246631	197.778	3.16908	7.40521
CEP290	HDAC2	+	BRCA	3	3	2	890	0.000246631	197.778	3.16908	7.40521
SPTA1	ZEB2		STAD	17	3	6	139	0.000248347	16.3529	1.31982	4.269
RYR2	DNAH10		COADREAD	11	4	5	166	0.000254146	18.8636	1.48772	4.38675
PCLO	ELTD1		STAD	21	2	6	136	0.000254866	19.4286	1.30174	4.63175
TSIX	TRIO		HNSC	7	6	4	259	0.000258394	24.6667	1.7343	4.67661
PCDH10	LPHN3		HNSC	10	4	4	258	0.000262777	25.8	1.72727	4.77348
VPS13B	SLC5A7		HNSC	10	4	4	258	0.000262777	25.8	1.72727	4.77348
VPS13B	PHKA2		HNSC	10	4	4	258	0.000262777	25.8	1.72727	4.77348
GABBR1	DACH2		STAD	2	3	3	157	0.000264541	78.5	2.24029	6.48591
PRKCG	SCN3A		STAD	2	3	3	157	0.000264541	78.5	2.24029	6.48591
ESRRG	SCN3A		STAD	2	3	3	157	0.000264541	78.5	2.24029	6.48591
SSH2	CHD5	+	STAD	3	2	3	157	0.000264541	78.5	2.24029	6.48591
UNC13C	OR6Y1		STAD	3	2	3	157	0.000264541	78.5	2.24029	6.48591
NRK	KCNB2		STAD	2	3	3	157	0.000264541	78.5	2.24029	6.48591
SORCS1	CNTN5		STAD	2	3	3	157	0.000264541	78.5	2.24029	6.48591
SORCS1	RP1L1		STAD	2	3	3	157	0.000264541	78.5	2.24029	6.48591
MUC6	ZMYM2		KIRC	8	3	3	402	0.000265117	50.25	2.17035	5.66367
ABCA13	AFF3		KIRC	8	3	3	402	0.000265117	50.25	2.17035	5.66367
CSMD1	LILRB4		KIRC	8	3	3	402	0.000265117	50.25	2.17035	5.66367
PIK3CA	SCN9A		BRCA	272.5	0.5	7.5	619.5	0.000265174	34.1009	0.663018	6.39563
RTN4	NOTCH2		BRCA	4	16	3	875	0.000267127	41.0156	2.13743	5.29048
MDN1	BAI3		BRCA	16	4	3	875	0.000267127	41.0156	2.13743	5.29048
LRFN5	CYLC1		STAD	5	4	4	152	0.000267714	30.4	1.7669	5.06198
MAP2	SI		STAD	5	4	4	152	0.000267714	30.4	1.7669	5.06198
SCN10A	PCDHA3		GBM	5	3	3	277	0.000273174	55.4	2.18612	5.84304
ATRX	EGFR	+	LGG	80.5	16.5	0.5	107.5	0.000274568	0.0404668	-6.03561	-0.378938
TTN	LEPR		HNSC	105.5	0.5	9.5	162.5	0.000288744	29.2654	0.522	6.23081
FRG1B	UBR3		BRCA	26	2	3	867	0.00029068	50.0192	2.08115	5.74367
CDH18	LOC647288		GBM	7	2	3	276	0.000293447	59.1429	2.13984	6.02007
GPR98	DMKN		KIRC	11	2	3	400	0.000293481	54.5455	2.11219	5.88588
ADAM6	FCGBP		STAD	35	1	7	122	0.000299633	24.4	1.06582	5.32335
MUC5B	SYNE1		HNSC	12	31	10	223	0.000309665	5.99462	0.871383	2.71034
SFRS15	EFCAB6		HNSC	3	5	3	265	0.00030997	53	2.14166	5.79892
LPHN3	NLRP3		HNSC	5	3	3	265	0.00030997	53	2.14166	5.79892
EYS	DRD5		HNSC	5	3	3	265	0.00030997	53	2.14166	5.79892
UTRN	ABCB1		HNSC	5	3	3	265	0.00030997	53	2.14166	5.79892
NLRP14	NAV2		HNSC	5	3	3	265	0.00030997	53	2.14166	5.79892
MIA3	MYH1		HNSC	3	5	3	265	0.00030997	53	2.14166	5.79892
MED12L	TCERG1		HNSC	5	3	3	265	0.00030997	53	2.14166	5.79892
EPHB1	PCDH17		HNSC	3	5	3	265	0.00030997	53	2.14166	5.79892
ACACB	SACS		HNSC	3	5	3	265	0.00030997	53	2.14166	5.79892
ATP11C	MCART3P		HNSC	5	3	3	265	0.00030997	53	2.14166	5.79892
NDST4	CAMTA1		HNSC	3	5	3	265	0.00030997	53	2.14166	5.79892
RSPH4A	IGSF10		HNSC	3	5	3	265	0.00030997	53	2.14166	5.79892
COL4A4	CASZ1		HNSC	5	3	3	265	0.00030997	53	2.14166	5.79892
LPPR4	SLC8A3		HNSC	3	5	3	265	0.00030997	53	2.14166	5.79892
SFRP4	GPR158		HNSC	3	5	3	265	0.00030997	53	2.14166	5.79892
NLRP4	PCDHA1		HNSC	3	5	3	265	0.00030997	53	2.14166	5.79892
NLRP12	CSNK2A1		HNSC	5	3	3	265	0.00030997	53	2.14166	5.79892
ANKRD11	PTH1R		HNSC	5	3	3	265	0.00030997	53	2.14166	5.79892
BAI3	MLLT4		HNSC	5	3	3	265	0.00030997	53	2.14166	5.79892
SYNE1	LPPR4		HNSC	36	1	5	234	0.00031072	32.5	1.30568	5.6568
SLC19A3	SYNE1		HNSC	1	36	5	234	0.00031072	32.5	1.30568	5.6568
MUC16	PREX2		STAD	26	5	9	125	0.000311339	8.65385	0.985975	3.33003
AHNAK2	CACNA1A		PRAD	4	3	3	225	0.000315216	56.25	2.14871	5.91091
APOB	MYH15		OV	8	2	3	299	0.000316458	56.0625	2.10439	5.94854
CACNA1S	HUWE1		OV	2	8	3	299	0.000316458	56.0625	2.10439	5.94854
PTEN	EGFR		LGG	5	11	5	182	0.000317242	16.5455	1.42518	4.18705
TP53	EGFR		LGG	100	15	1	87	0.000318803	0.058	-4.89189	-0.802739
TP53	FUBP1		LGG	100	15	1	87	0.000318803	0.058	-4.89189	-0.802739
KIAA1109	SYNE1		OV	3	6	3	300	0.000320656	50	2.11922	5.70482
SPTA1	MASP1		COADREAD	4	2	3	177	0.000320875	66.375	2.14998	6.24067
ODZ1	HUWE1		COADREAD	8	3	4	171	0.000322215	28.5	1.69352	5.00629
LRRK2	ZNF236		STAD	9	2	4	150	0.000328681	33.3333	1.68073	5.33239
NAV3	TSHZ3		STAD	9	2	4	150	0.000328681	33.3333	1.68073	5.33239
PLXNB2	EPHA5		UCEC	3	2	3	145	0.000331523	72.5	2.1603	6.40688
MUC16	LRP1B		STAD	22	13	13	117	0.000331526	5.31818	0.777561	2.5647
SSPO	LOC442421		HNSC	5	9	4	258	0.000332853	22.9333	1.65935	4.60584
RP1	MKI67		HNSC	9	5	4	258	0.000332853	22.9333	1.65935	4.60584
TRIO	FARP1		HNSC	7	2	3	264	0.000333012	56.5714	2.09522	5.97578
GLIS3	TRIO		HNSC	2	7	3	264	0.000333012	56.5714	2.09522	5.97578
KLKB1	SLITRK5		HNSC	2	7	3	264	0.000333012	56.5714	2.09522	5.97578
DOCK2	PKP4		HNSC	7	2	3	264	0.000333012	56.5714	2.09522	5.97578
PEX1	TACR3		HNSC	7	2	3	264	0.000333012	56.5714	2.09522	5.97578
CD163	HTR1E		HNSC	7	2	3	264	0.000333012	56.5714	2.09522	5.97578
EPHA3	CDK12		HNSC	7	2	3	264	0.000333012	56.5714	2.09522	5.97578
CPT1C	CD163		HNSC	2	7	3	264	0.000333012	56.5714	2.09522	5.97578
SVEP1	EEA1		HNSC	7	2	3	264	0.000333012	56.5714	2.09522	5.97578
FBN3	SP4		HNSC	7	2	3	264	0.000333012	56.5714	2.09522	5.97578
FBN3	TOPBP1		HNSC	7	2	3	264	0.000333012	56.5714	2.09522	5.97578
NLRP1	SVEP1		HNSC	2	7	3	264	0.000333012	56.5714	2.09522	5.97578
NPHP4	HFM1		HNSC	2	7	3	264	0.000333012	56.5714	2.09522	5.97578
PCNT	IRS4		HNSC	7	2	3	264	0.000333012	56.5714	2.09522	5.97578
DNAJC13	SPRYD5		HNSC	2	7	3	264	0.000333012	56.5714	2.09522	5.97578
MGAM	OR6K2		HNSC	7	2	3	264	0.000333012	56.5714	2.09522	5.97578
WHSC1	COL1A1	+	HNSC	7	2	3	264	0.000333012	56.5714	2.09522	5.97578
CTCF	LRPPRC		HNSC	7	2	3	264	0.000333012	56.5714	2.09522	5.97578
CTCF	OR4C11		HNSC	7	2	3	264	0.000333012	56.5714	2.09522	5.97578
SMG1	UGT2B11		HNSC	7	2	3	264	0.000333012	56.5714	2.09522	5.97578
VPS13B	AHNAK		KIRC	7	4	3	402	0.000334964	43.0714	2.08975	5.43597
FUT9	TEX15		HNSC	4	4	3	265	0.000338093	49.6875	2.11248	5.69903
F5	PRKD1		HNSC	4	4	3	265	0.000338093	49.6875	2.11248	5.69903
ABCB4	NF1		HNSC	4	4	3	265	0.000338093	49.6875	2.11248	5.69903
OR2T12	NBAS		HNSC	4	4	3	265	0.000338093	49.6875	2.11248	5.69903
IL16	WIPF1		HNSC	4	4	3	265	0.000338093	49.6875	2.11248	5.69903
ADAMTS18	SETBP1		HNSC	4	4	3	265	0.000338093	49.6875	2.11248	5.69903
TMEM132B	CES2		HNSC	4	4	3	265	0.000338093	49.6875	2.11248	5.69903
KRT5	ACSM2B		HNSC	4	4	3	265	0.000338093	49.6875	2.11248	5.69903
AFF3	SETBP1		HNSC	4	4	3	265	0.000338093	49.6875	2.11248	5.69903
ZNF608	PRR12		HNSC	4	4	3	265	0.000338093	49.6875	2.11248	5.69903
ARMC4	PCDHGA4		HNSC	4	4	3	265	0.000338093	49.6875	2.11248	5.69903
ARMC4	ZNF347		HNSC	4	4	3	265	0.000338093	49.6875	2.11248	5.69903
BRCA1	LOC653113		HNSC	4	4	3	265	0.000338093	49.6875	2.11248	5.69903
EPHA6	SDHAP1		HNSC	4	4	3	265	0.000338093	49.6875	2.11248	5.69903
PPP1R9A	MYH6		HNSC	4	4	3	265	0.000338093	49.6875	2.11248	5.69903
AKAP13	PPP1R9A		HNSC	4	4	3	265	0.000338093	49.6875	2.11248	5.69903
OR56A1	SRCAP	+	HNSC	4	4	3	265	0.000338093	49.6875	2.11248	5.69903
ABCC9	ZEB2		HNSC	4	4	3	265	0.000338093	49.6875	2.11248	5.69903
LIFR	SCN9A		COAD	2	2	3	114	0.000338448	85.5	2.17787	6.71916
TNR	SFMBT2	+	COAD	2	2	3	114	0.000338448	85.5	2.17787	6.71916
MUC16	TRRAP	+	STAD	30.5	0.5	5.5	130.5	0.000338623	47.0656	0.929716	6.77337
TTN	GPR98		THCA	11	2	3	380	0.000339649	51.8182	2.06076	5.83472
NAV3	NEDD9		BRCA	11	7	3	877	0.000340315	34.1688	2.05383	5.00879
NSD1	TJP1	+	HNSC	17	2	4	253	0.000342484	29.7647	1.6263	5.16034
SLC19A3	NSD1	+	HNSC	2	17	4	253	0.000342484	29.7647	1.6263	5.16034
LRP1B	PCDH17		HNSC	40	2	6	228	0.000343894	17.1	1.20385	4.4743
NLRP12	APOB		HNSC	4	11	4	257	0.000354007	23.3636	1.63956	4.6628
FAT2	TGFBR2		HNSC	11	4	4	257	0.000354007	23.3636	1.63956	4.6628
CDKN2A	APPL2		HNSC	53.5	0.5	5.5	218.5	0.00035606	44.9252	0.894491	6.71551
SYNE1	AKAP6		BRCA	22	3	3	870	0.000361658	39.5455	2.02213	5.33278
BOC	NLGN4X		COADREAD	3	3	3	177	0.000365202	59	2.11201	6.04307
MAP2	BOC		COADREAD	3	3	3	177	0.000365202	59	2.11201	6.04307
PTPRT	RALGAPA1		COADREAD	3	3	3	177	0.000365202	59	2.11201	6.04307
PCLO	FAM92A3		KIRC	12	2	3	399	0.000365493	49.875	2.0304	5.78864
LYST	ZAN		BRCA	8	10	3	877	0.000366736	32.8875	2.02705	4.95913
CAPN1	CDH4		BRCA	4	3	2	889	0.00036912	148.167	2.95725	7.03943
CAPN1	BCMO1		BRCA	4	3	2	889	0.00036912	148.167	2.95725	7.03943
CHI3L1	GTF3C1		BRCA	3	4	2	889	0.00036912	148.167	2.95725	7.03943
COMP	RERE	+	BRCA	3	4	2	889	0.00036912	148.167	2.95725	7.03943
IGDCC3	HIST1H2BC	+	BRCA	4	3	2	889	0.00036912	148.167	2.95725	7.03943
IGDCC3	PUM1		BRCA	4	3	2	889	0.00036912	148.167	2.95725	7.03943
ANKRD30A	MIS18BP1		BRCA	4	3	2	889	0.00036912	148.167	2.95725	7.03943
TRAPPC8	COMP		BRCA	4	3	2	889	0.00036912	148.167	2.95725	7.03943
FHAD1	IL6ST		BRCA	4	3	2	889	0.00036912	148.167	2.95725	7.03943
FHAD1	UBR3		BRCA	4	3	2	889	0.00036912	148.167	2.95725	7.03943
MARS	LINC00283		BRCA	4	3	2	889	0.00036912	148.167	2.95725	7.03943
TRIO	ITGAM		BRCA	4	3	2	889	0.00036912	148.167	2.95725	7.03943
ABR	SMG5		BRCA	4	3	2	889	0.00036912	148.167	2.95725	7.03943
SMARCA2	MIB1	+	BRCA	4	3	2	889	0.00036912	148.167	2.95725	7.03943
KCNA1	TRPC4AP		BRCA	4	3	2	889	0.00036912	148.167	2.95725	7.03943
CDH12	KCNA4		BRCA	4	3	2	889	0.00036912	148.167	2.95725	7.03943
MAP4K4	ZNF729		BRCA	3	4	2	889	0.00036912	148.167	2.95725	7.03943
ZMIZ1	CNKSR2		BRCA	3	4	2	889	0.00036912	148.167	2.95725	7.03943
PRPF8	RBL1		BRCA	4	3	2	889	0.00036912	148.167	2.95725	7.03943
CNTNAP4	DGKK		BRCA	4	3	2	889	0.00036912	148.167	2.95725	7.03943
ZCCHC11	PTPRN2		BRCA	3	4	2	889	0.00036912	148.167	2.95725	7.03943
SYCP2	PUM1		BRCA	4	3	2	889	0.00036912	148.167	2.95725	7.03943
HEPH	CEP250		BRCA	4	3	2	889	0.00036912	148.167	2.95725	7.03943
ELAC2	NFATC4		BRCA	3	4	2	889	0.00036912	148.167	2.95725	7.03943
COL4A4	NFATC4		BRCA	3	4	2	889	0.00036912	148.167	2.95725	7.03943
A2M	PMS1		BRCA	4	3	2	889	0.00036912	148.167	2.95725	7.03943
PCDHB11	KIAA1429		BRCA	3	4	2	889	0.00036912	148.167	2.95725	7.03943
MYT1	PRPF6		BRCA	3	4	2	889	0.00036912	148.167	2.95725	7.03943
ARAP3	DENND5B		BRCA	3	4	2	889	0.00036912	148.167	2.95725	7.03943
AFF3	TRAPPC8		BRCA	3	4	2	889	0.00036912	148.167	2.95725	7.03943
CD300LG	SBNO1		BRCA	3	4	2	889	0.00036912	148.167	2.95725	7.03943
CD300LG	SLC4A3		BRCA	3	4	2	889	0.00036912	148.167	2.95725	7.03943
KIDINS220	COMP		BRCA	4	3	2	889	0.00036912	148.167	2.95725	7.03943
KIF2B	DNM1		BRCA	4	3	2	889	0.00036912	148.167	2.95725	7.03943
KCNQ3	ZNF41		BRCA	3	4	2	889	0.00036912	148.167	2.95725	7.03943
GGT1	KIDINS220		BRCA	3	4	2	889	0.00036912	148.167	2.95725	7.03943
SCYL2	HIF3A		BRCA	4	3	2	889	0.00036912	148.167	2.95725	7.03943
TPTE2	AARS		BRCA	3	4	2	889	0.00036912	148.167	2.95725	7.03943
PHF12	MIS18BP1	+	BRCA	4	3	2	889	0.00036912	148.167	2.95725	7.03943
TRPM8	CDH12		BRCA	3	4	2	889	0.00036912	148.167	2.95725	7.03943
LNX1	INPPL1		BRCA	4	3	2	889	0.00036912	148.167	2.95725	7.03943
URB2	RIMBP2		BRCA	3	4	2	889	0.00036912	148.167	2.95725	7.03943
CPNE4	WDR96		BRCA	3	4	2	889	0.00036912	148.167	2.95725	7.03943
HOXB3	SYCP2		BRCA	3	4	2	889	0.00036912	148.167	2.95725	7.03943
ERCC6	MCM3AP		BRCA	4	3	2	889	0.00036912	148.167	2.95725	7.03943
TMEM131	POLE		BRCA	4	3	2	889	0.00036912	148.167	2.95725	7.03943
SLC6A10P	PILRB		BRCA	4	3	2	889	0.00036912	148.167	2.95725	7.03943
PDE4B	UNC80		BRCA	4	3	2	889	0.00036912	148.167	2.95725	7.03943
COL1A2	SLC8A1		BRCA	4	3	2	889	0.00036912	148.167	2.95725	7.03943
CEP120	INADL		BRCA	4	3	2	889	0.00036912	148.167	2.95725	7.03943
SEC16A	TRPM8		BRCA	4	3	2	889	0.00036912	148.167	2.95725	7.03943
PLEKHA6	ABCB7		BRCA	4	3	2	889	0.00036912	148.167	2.95725	7.03943
TRPM3	PRKCB		BRCA	4	3	2	889	0.00036912	148.167	2.95725	7.03943
FAM13B	TRAPPC8		BRCA	3	4	2	889	0.00036912	148.167	2.95725	7.03943
MC1R	DGKK		BRCA	4	3	2	889	0.00036912	148.167	2.95725	7.03943
ZNF462	LNX1		BRCA	3	4	2	889	0.00036912	148.167	2.95725	7.03943
ZNF462	CD97		BRCA	3	4	2	889	0.00036912	148.167	2.95725	7.03943
SLX4	TRO		BRCA	3	4	2	889	0.00036912	148.167	2.95725	7.03943
ZNF733P	ABCC5		BRCA	3	4	2	889	0.00036912	148.167	2.95725	7.03943
DSC2	ANKHD1		BRCA	4	3	2	889	0.00036912	148.167	2.95725	7.03943
LILRA1	MYO16		BRCA	3	4	2	889	0.00036912	148.167	2.95725	7.03943
KIAA1211	ABCC5		BRCA	3	4	2	889	0.00036912	148.167	2.95725	7.03943
KIAA1211	HEPH		BRCA	3	4	2	889	0.00036912	148.167	2.95725	7.03943
UBXN11	PTPRM		BRCA	4	3	2	889	0.00036912	148.167	2.95725	7.03943
NLRP12	CYP2A13		BRCA	3	4	2	889	0.00036912	148.167	2.95725	7.03943
C15orf39	RLF		BRCA	3	4	2	889	0.00036912	148.167	2.95725	7.03943
NLRP4	STARD9		BRCA	3	4	2	889	0.00036912	148.167	2.95725	7.03943
CCPG1	DOCK9		BRCA	4	3	2	889	0.00036912	148.167	2.95725	7.03943
WWC3	TSHZ2		BRCA	4	3	2	889	0.00036912	148.167	2.95725	7.03943
KIAA1328	ABCC5		BRCA	3	4	2	889	0.00036912	148.167	2.95725	7.03943
OSMR	SUPT6H		BRCA	3	4	2	889	0.00036912	148.167	2.95725	7.03943
DNMBP	SUPT6H		BRCA	3	4	2	889	0.00036912	148.167	2.95725	7.03943
BRD8	SUPT6H	+	BRCA	3	4	2	889	0.00036912	148.167	2.95725	7.03943
BRD8	LAMB3	+	BRCA	3	4	2	889	0.00036912	148.167	2.95725	7.03943
KDM2A	NLRP4	+	BRCA	4	3	2	889	0.00036912	148.167	2.95725	7.03943
KIAA1239	ODZ3		BRCA	4	3	2	889	0.00036912	148.167	2.95725	7.03943
BOD1L1	MEFV		BRCA	4	3	2	889	0.00036912	148.167	2.95725	7.03943
POLR2B	PSG1		BRCA	4	3	2	889	0.00036912	148.167	2.95725	7.03943
SHPRH	BCMO1	+	BRCA	4	3	2	889	0.00036912	148.167	2.95725	7.03943
ABCC6	PMEL		BRCA	4	3	2	889	0.00036912	148.167	2.95725	7.03943
ABCC6	ARAP2		BRCA	4	3	2	889	0.00036912	148.167	2.95725	7.03943
HIVEP3	PCDHB11		BRCA	4	3	2	889	0.00036912	148.167	2.95725	7.03943
UHRF1BP1L	TMCC1		BRCA	3	4	2	889	0.00036912	148.167	2.95725	7.03943
TRPC5	ARHGAP12		BRCA	4	3	2	889	0.00036912	148.167	2.95725	7.03943
VPRBP	DIAPH2		BRCA	3	4	2	889	0.00036912	148.167	2.95725	7.03943
SLC15A5	SLC35B2		BRCA	3	4	2	889	0.00036912	148.167	2.95725	7.03943
SLC15A5	TRIO		BRCA	3	4	2	889	0.00036912	148.167	2.95725	7.03943
IL11RA	ZC3H13		BRCA	3	4	2	889	0.00036912	148.167	2.95725	7.03943
SIGLEC1	UNC80		BRCA	4	3	2	889	0.00036912	148.167	2.95725	7.03943
LRRC41	ZBTB4		BRCA	4	3	2	889	0.00036912	148.167	2.95725	7.03943
LRRC41	PIP5K1C		BRCA	4	3	2	889	0.00036912	148.167	2.95725	7.03943
FLII	LRRC41		BRCA	3	4	2	889	0.00036912	148.167	2.95725	7.03943
BLK	PRAMEF11		BRCA	4	3	2	889	0.00036912	148.167	2.95725	7.03943
MAPRE3	GLYR1	+	BRCA	4	3	2	889	0.00036912	148.167	2.95725	7.03943
DENND4C	A2M		BRCA	3	4	2	889	0.00036912	148.167	2.95725	7.03943
DENND4C	DGKI		BRCA	3	4	2	889	0.00036912	148.167	2.95725	7.03943
BCL9L	EIF2C1		BRCA	4	3	2	889	0.00036912	148.167	2.95725	7.03943
NCF2	TINAG		BRCA	3	4	2	889	0.00036912	148.167	2.95725	7.03943
MCF2L2	PIK3CB		BRCA	4	3	2	889	0.00036912	148.167	2.95725	7.03943
ABCA4	PLXNB2		BRCA	4	3	2	889	0.00036912	148.167	2.95725	7.03943
NCKAP5	DOCK5		BRCA	3	4	2	889	0.00036912	148.167	2.95725	7.03943
CYHR1	ESPL1		BRCA	3	4	2	889	0.00036912	148.167	2.95725	7.03943
PLXNA2	ASAP1		BRCA	4	3	2	889	0.00036912	148.167	2.95725	7.03943
PLXNA2	PLCZ1		BRCA	4	3	2	889	0.00036912	148.167	2.95725	7.03943
PLXNA2	NUP214		BRCA	4	3	2	889	0.00036912	148.167	2.95725	7.03943
OR6C76	ZNF729		BRCA	3	4	2	889	0.00036912	148.167	2.95725	7.03943
SIN3B	NPC1		BRCA	3	4	2	889	0.00036912	148.167	2.95725	7.03943
ZNF479	CELP		BRCA	3	4	2	889	0.00036912	148.167	2.95725	7.03943
MPDZ	OTOP2		BRCA	3	4	2	889	0.00036912	148.167	2.95725	7.03943
ANKRD36B	NLGN3		BRCA	3	4	2	889	0.00036912	148.167	2.95725	7.03943
PCDHA5	LIMK1		BRCA	4	3	2	889	0.00036912	148.167	2.95725	7.03943
GYG2	UTP14A		BRCA	4	3	2	889	0.00036912	148.167	2.95725	7.03943
ALAS2	ABR		BRCA	3	4	2	889	0.00036912	148.167	2.95725	7.03943
SEC14L5	TRIM46		BRCA	4	3	2	889	0.00036912	148.167	2.95725	7.03943
PLIN4	TDRD6	+	BRCA	3	4	2	889	0.00036912	148.167	2.95725	7.03943
MOV10L1	MAPK4		BRCA	4	3	2	889	0.00036912	148.167	2.95725	7.03943
LRRC8C	POTEJ		BRCA	3	4	2	889	0.00036912	148.167	2.95725	7.03943
CARD11	IL1RL2		BRCA	4	3	2	889	0.00036912	148.167	2.95725	7.03943
SPAG17	SMG5		BRCA	4	3	2	889	0.00036912	148.167	2.95725	7.03943
SPAG17	EPS15		BRCA	4	3	2	889	0.00036912	148.167	2.95725	7.03943
HELZ	PRPF4B		BRCA	4	3	2	889	0.00036912	148.167	2.95725	7.03943
ZNF518B	ZNF658		BRCA	3	4	2	889	0.00036912	148.167	2.95725	7.03943
PCSK5	MAGED1		BRCA	4	3	2	889	0.00036912	148.167	2.95725	7.03943
C14orf38	DSPP		BRCA	3	4	2	889	0.00036912	148.167	2.95725	7.03943
ATP7A	SPARCL1		BRCA	4	3	2	889	0.00036912	148.167	2.95725	7.03943
PLXND1	MAPRE3		BRCA	3	4	2	889	0.00036912	148.167	2.95725	7.03943
DENND4B	TRAPPC8		BRCA	3	4	2	889	0.00036912	148.167	2.95725	7.03943
DENND4B	MYRIP		BRCA	3	4	2	889	0.00036912	148.167	2.95725	7.03943
HPSE	MYO9A		BRCA	3	4	2	889	0.00036912	148.167	2.95725	7.03943
HLA-J	TBCD		BRCA	4	3	2	889	0.00036912	148.167	2.95725	7.03943
POLD1	STARD9		BRCA	3	4	2	889	0.00036912	148.167	2.95725	7.03943
EHMT1	ADAMTS7	+	BRCA	4	3	2	889	0.00036912	148.167	2.95725	7.03943
EHMT1	POLD1	+	BRCA	4	3	2	889	0.00036912	148.167	2.95725	7.03943
SYBU	IGDCC3		BRCA	3	4	2	889	0.00036912	148.167	2.95725	7.03943
EPAS1	TOPBP1		BRCA	4	3	2	889	0.00036912	148.167	2.95725	7.03943
ARID2	C14orf38	+	BRCA	4	3	2	889	0.00036912	148.167	2.95725	7.03943
ARHGEF1	KIAA0226		BRCA	4	3	2	889	0.00036912	148.167	2.95725	7.03943
VAC14	DENND3		BRCA	4	3	2	889	0.00036912	148.167	2.95725	7.03943
RPTOR	EPB41L3		BRCA	4	3	2	889	0.00036912	148.167	2.95725	7.03943
RPTOR	CPNE4		BRCA	4	3	2	889	0.00036912	148.167	2.95725	7.03943
IL1RAPL1	DMBT1		BRCA	4	3	2	889	0.00036912	148.167	2.95725	7.03943
C10orf71	FAM5C		BRCA	3	4	2	889	0.00036912	148.167	2.95725	7.03943
AKAP4	IL1RAPL1		BRCA	3	4	2	889	0.00036912	148.167	2.95725	7.03943
IQSEC2	SAFB2		BRCA	4	3	2	889	0.00036912	148.167	2.95725	7.03943
HS6ST2	IQSEC2		BRCA	3	4	2	889	0.00036912	148.167	2.95725	7.03943
DZANK1	TRPV2		BRCA	3	4	2	889	0.00036912	148.167	2.95725	7.03943
DNAH8	TTC39A		BRCA	3	4	2	889	0.00036912	148.167	2.95725	7.03943
FRMD4A	KIAA1211		BRCA	4	3	2	889	0.00036912	148.167	2.95725	7.03943
DUSP27	PDE1B		BRCA	3	4	2	889	0.00036912	148.167	2.95725	7.03943
ZNF544	TBC1D4		BRCA	3	4	2	889	0.00036912	148.167	2.95725	7.03943
ADAMTS20	CNTN6		BRCA	3	4	2	889	0.00036912	148.167	2.95725	7.03943
NALCN	MYO3A		OV	5	4	3	300	0.000372274	45	2.06826	5.54507
FLT3	TP53		LAML	56.5	15.5	0.5	65.5	0.000378622	0.0373965	-6.12478	-0.447571
LAMA4	LRP6		HNSC	8	6	4	258	0.00038064	21.5	1.62038	4.51573
RUNX1T1	AHNAK2		HNSC	6	8	4	258	0.00038064	21.5	1.62038	4.51573
MUC16	ADAMTS16		COAD	9	1	4	107	0.000394919	47.5556	1.56739	6.1564
CDH9	DNAH7		HNSC	7	13	5	251	0.000395641	13.7912	1.34813	3.89994
SYNE2	ZNF99		HNSC	13	7	5	251	0.000395641	13.7912	1.34813	3.89994
GRM1	PLCB1		HNSC	7	7	4	258	0.000397578	21.0612	1.60768	4.48719
VPS13C	GRM1		HNSC	7	7	4	258	0.000397578	21.0612	1.60768	4.48719
MLL3	NBAS	+	HNSC	14	3	4	255	0.000399018	24.2857	1.59917	4.78061
COL11A1	PRR12		HNSC	14	3	4	255	0.000399018	24.2857	1.59917	4.78061
POTEC	LILRB1		GBM	8	2	3	275	0.000401329	51.5625	2.02043	5.86516
FLT3	DNAH3		GBM	2	8	3	275	0.000401329	51.5625	2.02043	5.86516
NPM1	TP53		LAML	54.5	15.5	0.5	67.5	0.000402739	0.0399526	-6.0588	-0.38132
IDH1	NF1	+	LGG	148	8	2	45	0.000405008	0.0760135	-4.16188	-0.991812
LAMA1	PROKR2		GBM	6	3	3	276	0.000406488	46	2.03553	5.62175
SPTA1	ELN		BRCA	23	3	3	869	0.000407786	37.7826	1.97882	5.28488
RYR2	ANKRD30A		BRCA	23	3	3	869	0.000407786	37.7826	1.97882	5.28488
RNA5-8SP6	ANKRD30B		BRCA	23	3	3	869	0.000407786	37.7826	1.97882	5.28488
SI	NBPF10		HNSC	16	17	8	235	0.000409218	6.91176	0.952091	2.91436
AHNAK2	MUC6		KIRC	12	7	4	393	0.000413819	18.7143	1.57315	4.28542
LAMA2	TSIX		HNSC	15	6	5	250	0.000418738	13.8889	1.33492	3.92726
BRCA1	MYST4	+	OV	9	2	3	298	0.000419858	49.6667	1.99718	5.81349
BAI1	NOTCH2		BRCA	5	16	3	874	0.000421673	32.775	1.97529	5.00405
FRAS1	DNAH9		BRCA	7	12	3	876	0.000422885	31.2857	1.97556	4.91076
FLG	ODZ3		BRCA	30	2	3	863	0.000431065	43.15	1.9388	5.59056
RIMS2	CYLC1		STAD	6	4	4	151	0.000437126	25.1667	1.61726	4.83378
MYO16	MUC16		HNSC	2	42	6	226	0.00044402	16.1429	1.14761	4.41535
BRCA2	KIAA1109		OV	7	3	3	299	0.000454702	42.7143	1.98741	5.52165
DPP10	UTP20		HNSC	8	2	3	263	0.00045533	49.3125	1.97564	5.82071
EPHA7	PTCHD1		HNSC	8	2	3	263	0.00045533	49.3125	1.97564	5.82071
APC	KIAA2018		HNSC	8	2	3	263	0.00045533	49.3125	1.97564	5.82071
GRIN2B	PTGS1		HNSC	8	2	3	263	0.00045533	49.3125	1.97564	5.82071
HYDIN	FBXL7		HNSC	8	2	3	263	0.00045533	49.3125	1.97564	5.82071
KEAP1	ATF7IP		HNSC	8	2	3	263	0.00045533	49.3125	1.97564	5.82071
BTAF1	GRM1		HNSC	2	8	3	263	0.00045533	49.3125	1.97564	5.82071
UHRF1BP1L	FAM47C		HNSC	2	8	3	263	0.00045533	49.3125	1.97564	5.82071
FAM5B	DCC		HNSC	2	8	3	263	0.00045533	49.3125	1.97564	5.82071
VPS13C	IQUB		HNSC	8	2	3	263	0.00045533	49.3125	1.97564	5.82071
TLR4	ADAMTS5		STAD	10	2	4	149	0.000455376	29.8	1.58036	5.20866
OR4N2	APC		STAD	2	10	4	149	0.000455376	29.8	1.58036	5.20866
POSTN	AFF2		STAD	2	4	3	156	0.000458604	58.5	2.02297	6.11509
EPHA5	FZD10		STAD	4	2	3	156	0.000458604	58.5	2.02297	6.11509
CDH11	RGS12		STAD	4	2	3	156	0.000458604	58.5	2.02297	6.11509
HCN1	PCDHB3		STAD	4	2	3	156	0.000458604	58.5	2.02297	6.11509
GRM8	ZNF85		STAD	4	2	3	156	0.000458604	58.5	2.02297	6.11509
AKAP6	OR5L2		STAD	4	2	3	156	0.000458604	58.5	2.02297	6.11509
TPO	ATP10A		STAD	4	2	3	156	0.000458604	58.5	2.02297	6.11509
OVCH1	EPHA6		STAD	2	4	3	156	0.000458604	58.5	2.02297	6.11509
NEBL	PTPRB		STAD	4	2	3	156	0.000458604	58.5	2.02297	6.11509
HSD17B7P2	OR2T3		STAD	4	2	3	156	0.000458604	58.5	2.02297	6.11509
ADAMTS12	MGAT4C		STAD	4	2	3	156	0.000458604	58.5	2.02297	6.11509
PDE4DIP	EPHA8		STAD	4	2	3	156	0.000458604	58.5	2.02297	6.11509
BRWD1	KRT73	+	STAD	2	4	3	156	0.000458604	58.5	2.02297	6.11509
ATP1A4	GPC5		STAD	2	4	3	156	0.000458604	58.5	2.02297	6.11509
SPHKAP	EPHA6		STAD	2	4	3	156	0.000458604	58.5	2.02297	6.11509
SNTG2	AFF2		STAD	2	4	3	156	0.000458604	58.5	2.02297	6.11509
SACS	SNTG2		STAD	4	2	3	156	0.000458604	58.5	2.02297	6.11509
ZNF804A	CHRM2		STAD	2	4	3	156	0.000458604	58.5	2.02297	6.11509
DYNC2H1	ZNF804A		STAD	4	2	3	156	0.000458604	58.5	2.02297	6.11509
PTEN	FRAS1		STAD	4	2	3	156	0.000458604	58.5	2.02297	6.11509
ZNF492	AKAP6		STAD	2	4	3	156	0.000458604	58.5	2.02297	6.11509
ZNF492	EPHA6		STAD	2	4	3	156	0.000458604	58.5	2.02297	6.11509
LOC162632	SPEN		STAD	4	2	3	156	0.000458604	58.5	2.02297	6.11509
BTBD11	MMP16		STAD	4	2	3	156	0.000458604	58.5	2.02297	6.11509
HERC1	C2orf16		HNSC	10	5	4	257	0.000458989	20.56	1.56464	4.48206
ERBB4	PCDH10		HNSC	5	10	4	257	0.000458989	20.56	1.56464	4.48206
DNAH8	CFH		HNSC	10	5	4	257	0.000458989	20.56	1.56464	4.48206
XIRP2	FAT4		STAD	9	15	8	133	0.000460503	7.88148	0.972712	3.15632
PRG4	PCDHA2		HNSC	6	3	3	264	0.000461077	44	1.9909	5.57748
NID2	WDR7		HNSC	6	3	3	264	0.000461077	44	1.9909	5.57748
ATP11A	PRUNE2		HNSC	3	6	3	264	0.000461077	44	1.9909	5.57748
NIN	SPEN		HNSC	3	6	3	264	0.000461077	44	1.9909	5.57748
ZNF667	TNIK		HNSC	3	6	3	264	0.000461077	44	1.9909	5.57748
OR5L2	CUX1		HNSC	3	6	3	264	0.000461077	44	1.9909	5.57748
SSPO	MYH2		HNSC	6	3	3	264	0.000461077	44	1.9909	5.57748
KIF14	SPEN		HNSC	3	6	3	264	0.000461077	44	1.9909	5.57748
ARID2	OR4A15	+	HNSC	6	3	3	264	0.000461077	44	1.9909	5.57748
ZFHX3	WDR7		HNSC	6	3	3	264	0.000461077	44	1.9909	5.57748
C4orf31	UNC5C		HNSC	3	6	3	264	0.000461077	44	1.9909	5.57748
SETD2	GRM3	+	HNSC	3	6	3	264	0.000461077	44	1.9909	5.57748
PROX1	ADAM2		HNSC	6	3	3	264	0.000461077	44	1.9909	5.57748
CACNA1E	SGK269		HNSC	6	3	3	264	0.000461077	44	1.9909	5.57748
DRP2	MAP2		HNSC	3	6	3	264	0.000461077	44	1.9909	5.57748
MYBPC1	COL17A1		HNSC	6	3	3	264	0.000461077	44	1.9909	5.57748
ABCA10	ATP10B		HNSC	6	3	3	264	0.000461077	44	1.9909	5.57748
SMAD4	TNIK		HNSC	3	6	3	264	0.000461077	44	1.9909	5.57748
OR2T1	ABCA10		HNSC	3	6	3	264	0.000461077	44	1.9909	5.57748
RIMBP2	WDR7		HNSC	6	3	3	264	0.000461077	44	1.9909	5.57748
RIMBP2	RPTOR		HNSC	6	3	3	264	0.000461077	44	1.9909	5.57748
KCNB2	SOX5		HNSC	6	3	3	264	0.000461077	44	1.9909	5.57748
ATP13A4	LPPR4		HNSC	6	3	3	264	0.000461077	44	1.9909	5.57748
CTNND2	PCDHA7		HNSC	12	4	4	256	0.000466296	21.3333	1.55829	4.56225
KALRN	EFCAB6		HNSC	12	4	4	256	0.000466296	21.3333	1.55829	4.56225
WASH2P	ARHGAP11B		HNSC	12	4	4	256	0.000466296	21.3333	1.55829	4.56225
FMN2	PDE10A		HNSC	12	4	4	256	0.000466296	21.3333	1.55829	4.56225
MUC16	CD1E		COADREAD	16	1	4	165	0.000466499	41.25	1.46901	5.97029
TMEM132D	MAP2		STAD	5	5	4	151	0.000469714	24.16	1.59647	4.77293
ZEB2	ZNF536		STAD	5	5	4	151	0.000469714	24.16	1.59647	4.77293
MST1P2	C6		HNSC	30	4	6	236	0.000471275	11.8	1.14712	3.78908
WBSCR17	CHD5	+	GBM	5	4	3	276	0.000471727	41.4	1.98455	5.46201
TTN	PKHD1L1		BRCA	115	8	8	767	0.000492585	6.66957	0.898148	2.89696
LOC650368	SDHAP2		HNSC	18	5	5	248	0.000495243	13.7778	1.29432	3.9518
PLEC	MYH7		HNSC	19	2	4	251	0.000500465	26.4211	1.51385	5.03447
PAPPA2	FUT9		HNSC	15	3	4	254	0.000500789	22.5778	1.53199	4.70195
ZEB2	C21orf99		HNSC	3	15	4	254	0.000500789	22.5778	1.53199	4.70195
KIAA0467	PAPPA2		HNSC	3	15	4	254	0.000500789	22.5778	1.53199	4.70195
OBSCN	LPHN3		COADREAD	5	2	3	176	0.000509127	52.8	1.96864	5.96438
TET1	GTF3C1	+	COADREAD	5	2	3	176	0.000509127	52.8	1.96864	5.96438
JAKMIP2	PCLO		COADREAD	2	5	3	176	0.000509127	52.8	1.96864	5.96438
RELN	PLXNA4		COADREAD	5	2	3	176	0.000509127	52.8	1.96864	5.96438
PKHD1	LRP1B		STAD	5	19	7	134	0.000512369	9.87368	1.0457	3.53405
RYR3	PPP1R3A		STAD	8	3	4	150	0.000515015	25	1.56155	4.87621
PKHD1	SEMA6D		STAD	8	3	4	150	0.000515015	25	1.56155	4.87621
ZNF841	POGZ		BRCA	5	3	2	888	0.000515612	118.4	2.78058	6.76755
OTOG	ABCC9		BRCA	3	5	2	888	0.000515612	118.4	2.78058	6.76755
DNAJC13	RFX4		BRCA	5	3	2	888	0.000515612	118.4	2.78058	6.76755
NKTR	ZBTB4		BRCA	5	3	2	888	0.000515612	118.4	2.78058	6.76755
KCNB1	NKTR		BRCA	3	5	2	888	0.000515612	118.4	2.78058	6.76755
NLRP2	SH3KBP1		BRCA	5	3	2	888	0.000515612	118.4	2.78058	6.76755
NLRP2	OTUD7B		BRCA	5	3	2	888	0.000515612	118.4	2.78058	6.76755
ZNF142	DMXL1		BRCA	3	5	2	888	0.000515612	118.4	2.78058	6.76755
MYT1	ZNF644		BRCA	3	5	2	888	0.000515612	118.4	2.78058	6.76755
BAX	HDAC6	+	BRCA	3	5	2	888	0.000515612	118.4	2.78058	6.76755
CCDC87	NLRP2		BRCA	3	5	2	888	0.000515612	118.4	2.78058	6.76755
SLC4A4	IL13RA2		BRCA	5	3	2	888	0.000515612	118.4	2.78058	6.76755
NLGN4X	PTPRJ		BRCA	5	3	2	888	0.000515612	118.4	2.78058	6.76755
LRRC16B	ZNF142		BRCA	5	3	2	888	0.000515612	118.4	2.78058	6.76755
SMTN	ASAP1		BRCA	5	3	2	888	0.000515612	118.4	2.78058	6.76755
LMTK2	C20orf112		BRCA	5	3	2	888	0.000515612	118.4	2.78058	6.76755
LMTK2	TSC2		BRCA	5	3	2	888	0.000515612	118.4	2.78058	6.76755
KCNH1	GLI3		BRCA	3	5	2	888	0.000515612	118.4	2.78058	6.76755
TRPM8	ZNF644		BRCA	3	5	2	888	0.000515612	118.4	2.78058	6.76755
JMJD1C	KCNH1	+	BRCA	5	3	2	888	0.000515612	118.4	2.78058	6.76755
C2CD3	JMJD1C	+	BRCA	3	5	2	888	0.000515612	118.4	2.78058	6.76755
TMTC4	LARP1		BRCA	5	3	2	888	0.000515612	118.4	2.78058	6.76755
COBLL1	TMTC4		BRCA	3	5	2	888	0.000515612	118.4	2.78058	6.76755
BRWD3	KIF13A	+	BRCA	5	3	2	888	0.000515612	118.4	2.78058	6.76755
NRP2	AP3B1		BRCA	5	3	2	888	0.000515612	118.4	2.78058	6.76755
MED13	NRP2		BRCA	3	5	2	888	0.000515612	118.4	2.78058	6.76755
LIMK1	GPSM2		BRCA	3	5	2	888	0.000515612	118.4	2.78058	6.76755
PCDHA9	TTC14		BRCA	5	3	2	888	0.000515612	118.4	2.78058	6.76755
MKI67	PCDHB6		BRCA	3	5	2	888	0.000515612	118.4	2.78058	6.76755
NSD1	DSG3	+	BRCA	3	5	2	888	0.000515612	118.4	2.78058	6.76755
PRAMEF4	LRRC16B		BRCA	3	5	2	888	0.000515612	118.4	2.78058	6.76755
CNOT3	BAX		BRCA	5	3	2	888	0.000515612	118.4	2.78058	6.76755
RPS6KA2	REV3L		BRCA	3	5	2	888	0.000515612	118.4	2.78058	6.76755
PAXIP1	NBEA		BRCA	3	5	2	888	0.000515612	118.4	2.78058	6.76755
RGS3	ATP2B4		BRCA	5	3	2	888	0.000515612	118.4	2.78058	6.76755
RGS3	NCOA3	+	BRCA	5	3	2	888	0.000515612	118.4	2.78058	6.76755
ECE2	RGS3		BRCA	3	5	2	888	0.000515612	118.4	2.78058	6.76755
ARHGAP11A	RGS3		BRCA	3	5	2	888	0.000515612	118.4	2.78058	6.76755
POLQ	IL13RA2		BRCA	5	3	2	888	0.000515612	118.4	2.78058	6.76755
EIF4G3	RIPK1		BRCA	3	5	2	888	0.000515612	118.4	2.78058	6.76755
TRIM46	VWA3B		BRCA	3	5	2	888	0.000515612	118.4	2.78058	6.76755
LILRA1	GPRASP2		BRCA	3	5	2	888	0.000515612	118.4	2.78058	6.76755
GLUL	NYNRIN		BRCA	3	5	2	888	0.000515612	118.4	2.78058	6.76755
FER1L6	ZNF462		BRCA	5	3	2	888	0.000515612	118.4	2.78058	6.76755
SEL1L2	PARP8		BRCA	3	5	2	888	0.000515612	118.4	2.78058	6.76755
GIMAP8	EPS15		BRCA	5	3	2	888	0.000515612	118.4	2.78058	6.76755
FOLH1	FRMPD2		BRCA	5	3	2	888	0.000515612	118.4	2.78058	6.76755
C15orf39	CNTNAP5		BRCA	3	5	2	888	0.000515612	118.4	2.78058	6.76755
ZNF536	HIF3A		BRCA	5	3	2	888	0.000515612	118.4	2.78058	6.76755
INTS4L2	GLI3		BRCA	3	5	2	888	0.000515612	118.4	2.78058	6.76755
VAV3	WBP11P1		BRCA	3	5	2	888	0.000515612	118.4	2.78058	6.76755
TCF20	NCOA3	+	BRCA	5	3	2	888	0.000515612	118.4	2.78058	6.76755
PCDHB18	PCDHA8		BRCA	5	3	2	888	0.000515612	118.4	2.78058	6.76755
NRIP1	GNL3L		BRCA	5	3	2	888	0.000515612	118.4	2.78058	6.76755
NRIP1	NLRP12		BRCA	5	3	2	888	0.000515612	118.4	2.78058	6.76755
NRIP1	FAM71B		BRCA	5	3	2	888	0.000515612	118.4	2.78058	6.76755
NOTCH1	NRIP1		BRCA	3	5	2	888	0.000515612	118.4	2.78058	6.76755
MAGED1	TECTA		BRCA	3	5	2	888	0.000515612	118.4	2.78058	6.76755
EPG5	FAM71B		BRCA	5	3	2	888	0.000515612	118.4	2.78058	6.76755
MARK1	SELP		BRCA	3	5	2	888	0.000515612	118.4	2.78058	6.76755
DNMBP	MPHOSPH8	+	BRCA	3	5	2	888	0.000515612	118.4	2.78058	6.76755
BRD8	SELP	+	BRCA	3	5	2	888	0.000515612	118.4	2.78058	6.76755
GOLGA8DP	ZNF142		BRCA	5	3	2	888	0.000515612	118.4	2.78058	6.76755
MYOF	INPPL1		BRCA	5	3	2	888	0.000515612	118.4	2.78058	6.76755
MYOF	NLRP4		BRCA	5	3	2	888	0.000515612	118.4	2.78058	6.76755
CREBBP	RRNAD1	+	BRCA	5	3	2	888	0.000515612	118.4	2.78058	6.76755
CREBBP	HJURP	+	BRCA	5	3	2	888	0.000515612	118.4	2.78058	6.76755
SVIL	ZFR		BRCA	5	3	2	888	0.000515612	118.4	2.78058	6.76755
SVIL	C2orf16		BRCA	5	3	2	888	0.000515612	118.4	2.78058	6.76755
PHF3	OR2T27	+	BRCA	5	3	2	888	0.000515612	118.4	2.78058	6.76755
PHF3	FXYD3	+	BRCA	5	3	2	888	0.000515612	118.4	2.78058	6.76755
NALCN	PUM1		BRCA	5	3	2	888	0.000515612	118.4	2.78058	6.76755
VPRBP	DOPEY1		BRCA	3	5	2	888	0.000515612	118.4	2.78058	6.76755
TRPC7	VPRBP		BRCA	5	3	2	888	0.000515612	118.4	2.78058	6.76755
SLC15A5	TRPC7		BRCA	3	5	2	888	0.000515612	118.4	2.78058	6.76755
RNF40	TRPC7		BRCA	3	5	2	888	0.000515612	118.4	2.78058	6.76755
WDR33	XRRA1		BRCA	3	5	2	888	0.000515612	118.4	2.78058	6.76755
PRRC2C	GRIN3A		BRCA	5	3	2	888	0.000515612	118.4	2.78058	6.76755
ADAMTS2	IL11RA		BRCA	5	3	2	888	0.000515612	118.4	2.78058	6.76755
PPEF1	AMBRA1		BRCA	5	3	2	888	0.000515612	118.4	2.78058	6.76755
PHACTR1	NALCN		BRCA	3	5	2	888	0.000515612	118.4	2.78058	6.76755
FARP2	PSG1		BRCA	5	3	2	888	0.000515612	118.4	2.78058	6.76755
FARP2	CNDP1		BRCA	5	3	2	888	0.000515612	118.4	2.78058	6.76755
FARP2	CYFIP2		BRCA	5	3	2	888	0.000515612	118.4	2.78058	6.76755
GRIK1	PRKG2		BRCA	3	5	2	888	0.000515612	118.4	2.78058	6.76755
WDR52	SLC15A5		BRCA	5	3	2	888	0.000515612	118.4	2.78058	6.76755
PDE3A	ABCA12		BRCA	5	3	2	888	0.000515612	118.4	2.78058	6.76755
PDE3A	KIAA0226		BRCA	5	3	2	888	0.000515612	118.4	2.78058	6.76755
PCDHA11	NYNRIN		BRCA	3	5	2	888	0.000515612	118.4	2.78058	6.76755
PIKFYVE	ADAMTS19		BRCA	3	5	2	888	0.000515612	118.4	2.78058	6.76755
LRRC8C	TCF20	+	BRCA	3	5	2	888	0.000515612	118.4	2.78058	6.76755
IMPG1	LRRC8C		BRCA	5	3	2	888	0.000515612	118.4	2.78058	6.76755
ARHGAP35	TRPC4AP		BRCA	5	3	2	888	0.000515612	118.4	2.78058	6.76755
CELSR1	INPPL1		BRCA	5	3	2	888	0.000515612	118.4	2.78058	6.76755
CELSR1	RASGRF1		BRCA	5	3	2	888	0.000515612	118.4	2.78058	6.76755
ROBO1	NKTR		BRCA	3	5	2	888	0.000515612	118.4	2.78058	6.76755
CPSF1	PNMAL1		BRCA	5	3	2	888	0.000515612	118.4	2.78058	6.76755
CPSF1	DOPEY2		BRCA	5	3	2	888	0.000515612	118.4	2.78058	6.76755
EFCAB5	SPEF2		BRCA	5	3	2	888	0.000515612	118.4	2.78058	6.76755
ATP2B3	DDX21		BRCA	5	3	2	888	0.000515612	118.4	2.78058	6.76755
SETD1B	ZMIZ1	+	BRCA	5	3	2	888	0.000515612	118.4	2.78058	6.76755
C14orf38	SETD1B	+	BRCA	3	5	2	888	0.000515612	118.4	2.78058	6.76755
TRIP11	RPS6KA1		BRCA	5	3	2	888	0.000515612	118.4	2.78058	6.76755
MYH10	TCP10		BRCA	5	3	2	888	0.000515612	118.4	2.78058	6.76755
IQSEC1	CNTNAP2		BRCA	3	5	2	888	0.000515612	118.4	2.78058	6.76755
ELL2	VPS13A		BRCA	3	5	2	888	0.000515612	118.4	2.78058	6.76755
LDB2	TRIM46		BRCA	5	3	2	888	0.000515612	118.4	2.78058	6.76755
C15orf55	PTPRQ		BRCA	3	5	2	888	0.000515612	118.4	2.78058	6.76755
BAI3	ZMIZ1		BRCA	5	3	2	888	0.000515612	118.4	2.78058	6.76755
BAI3	RASGRF1		BRCA	5	3	2	888	0.000515612	118.4	2.78058	6.76755
LRIG2	POTEE		BRCA	3	5	2	888	0.000515612	118.4	2.78058	6.76755
CHD9	ARHGAP29	+	BRCA	5	3	2	888	0.000515612	118.4	2.78058	6.76755
POLD1	MYOF		BRCA	3	5	2	888	0.000515612	118.4	2.78058	6.76755
LAMA3	PVRL3		BRCA	5	3	2	888	0.000515612	118.4	2.78058	6.76755
LAMA3	PCDHA11		BRCA	5	3	2	888	0.000515612	118.4	2.78058	6.76755
ABCB1	NOTCH3		BRCA	3	5	2	888	0.000515612	118.4	2.78058	6.76755
MYBPC2	UBN2		BRCA	5	3	2	888	0.000515612	118.4	2.78058	6.76755
MYBPC2	PPOX		BRCA	5	3	2	888	0.000515612	118.4	2.78058	6.76755
PTCHD1	TET3	+	BRCA	3	5	2	888	0.000515612	118.4	2.78058	6.76755
ACVR1B	NOTCH4		BRCA	3	5	2	888	0.000515612	118.4	2.78058	6.76755
ACVR2A	CYB5R1		BRCA	5	3	2	888	0.000515612	118.4	2.78058	6.76755
XKR4	CACNA1D		BRCA	3	5	2	888	0.000515612	118.4	2.78058	6.76755
NBEAL1	PTPRJ		BRCA	5	3	2	888	0.000515612	118.4	2.78058	6.76755
HS6ST2	NBEAL1		BRCA	3	5	2	888	0.000515612	118.4	2.78058	6.76755
ZNF804B	PLXNB2		BRCA	5	3	2	888	0.000515612	118.4	2.78058	6.76755
GOLGA3	ZNF142		BRCA	5	3	2	888	0.000515612	118.4	2.78058	6.76755
GOLGA3	BNC2		BRCA	5	3	2	888	0.000515612	118.4	2.78058	6.76755
GOLGA3	TBC1D8		BRCA	5	3	2	888	0.000515612	118.4	2.78058	6.76755
GOLGA3	KCNH7		BRCA	5	3	2	888	0.000515612	118.4	2.78058	6.76755
ATP1A4	RRNAD1		BRCA	5	3	2	888	0.000515612	118.4	2.78058	6.76755
ATP1A4	WDR33		BRCA	5	3	2	888	0.000515612	118.4	2.78058	6.76755
ATP1A4	DCST1		BRCA	5	3	2	888	0.000515612	118.4	2.78058	6.76755
FAM182B	CAPN2		BRCA	5	3	2	888	0.000515612	118.4	2.78058	6.76755
OR8H3	OR4C16		STAD	3	3	3	156	0.000521675	52	1.98497	5.91752
KCNU1	CDH2		STAD	3	3	3	156	0.000521675	52	1.98497	5.91752
KCNU1	RPS6KA6		STAD	3	3	3	156	0.000521675	52	1.98497	5.91752
OR5T1	OR4C16		STAD	3	3	3	156	0.000521675	52	1.98497	5.91752
OR5T1	OR8H3		STAD	3	3	3	156	0.000521675	52	1.98497	5.91752
ERBB2	DACH2		STAD	3	3	3	156	0.000521675	52	1.98497	5.91752
ERBB2	KCNB2		STAD	3	3	3	156	0.000521675	52	1.98497	5.91752
LYST	OR5D14		STAD	3	3	3	156	0.000521675	52	1.98497	5.91752
CRB1	PASD1		STAD	3	3	3	156	0.000521675	52	1.98497	5.91752
ALMS1	CRB1		STAD	3	3	3	156	0.000521675	52	1.98497	5.91752
UNC13C	NRXN3		STAD	3	3	3	156	0.000521675	52	1.98497	5.91752
CFH	PCDHA1		STAD	3	3	3	156	0.000521675	52	1.98497	5.91752
SCAND3	SCN4A		STAD	3	3	3	156	0.000521675	52	1.98497	5.91752
SCAND3	OTOF		STAD	3	3	3	156	0.000521675	52	1.98497	5.91752
KCNMB2	COL4A4		STAD	3	3	3	156	0.000521675	52	1.98497	5.91752
HFM1	UNC5D		STAD	3	3	3	156	0.000521675	52	1.98497	5.91752
EFCAB6	KCNH7		STAD	3	3	3	156	0.000521675	52	1.98497	5.91752
ZNF479	TRPC4		STAD	3	3	3	156	0.000521675	52	1.98497	5.91752
RP1L1	CNTN5		STAD	3	3	3	156	0.000521675	52	1.98497	5.91752
ZNF43	CNTN3		STAD	3	3	3	156	0.000521675	52	1.98497	5.91752
ZNF43	ALMS1		STAD	3	3	3	156	0.000521675	52	1.98497	5.91752
TTN	RYR3		STAD	61	1	11	92	0.000525243	16.5902	0.736234	4.88139
PIK3CA	TNR		KIRC	7	5	3	401	0.000529101	34.3714	1.92253	5.15192
PI4KA	XIRP2		KIRC	5	7	3	401	0.000529101	34.3714	1.92253	5.15192
STAG2	RGPD5		GBM	9	2	3	274	0.000532233	45.6667	1.91291	5.72982
PLCL1	HEPH		HNSC	4	5	3	264	0.000534952	39.6	1.93992	5.41774
DCHS1	MYH6		HNSC	5	4	3	264	0.000534952	39.6	1.93992	5.41774
KIAA1109	BICD1		HNSC	4	5	3	264	0.000534952	39.6	1.93992	5.41774
DPPA2	TAF1	+	HNSC	5	4	3	264	0.000534952	39.6	1.93992	5.41774
TGFBR2	KCNN2		HNSC	5	4	3	264	0.000534952	39.6	1.93992	5.41774
KIAA1429	WNK4		HNSC	5	4	3	264	0.000534952	39.6	1.93992	5.41774
KIAA1429	COL5A1		HNSC	5	4	3	264	0.000534952	39.6	1.93992	5.41774
KIAA1199	KIAA0907		HNSC	4	5	3	264	0.000534952	39.6	1.93992	5.41774
LOC653113	KIAA0907		HNSC	4	5	3	264	0.000534952	39.6	1.93992	5.41774
LOC653113	BAGE2		HNSC	4	5	3	264	0.000534952	39.6	1.93992	5.41774
CRB1	RGS7		HNSC	5	4	3	264	0.000534952	39.6	1.93992	5.41774
STEAP4	NINL		HNSC	5	4	3	264	0.000534952	39.6	1.93992	5.41774
ATP10A	ANO4		HNSC	4	5	3	264	0.000534952	39.6	1.93992	5.41774
CMYA5	COL1A2		HNSC	4	5	3	264	0.000534952	39.6	1.93992	5.41774
SHANK2	ADAMTS9		HNSC	5	4	3	264	0.000534952	39.6	1.93992	5.41774
NLRP12	CELSR1		HNSC	5	4	3	264	0.000534952	39.6	1.93992	5.41774
SLC8A1	OLFM3		HNSC	4	5	3	264	0.000534952	39.6	1.93992	5.41774
ZEB2	PLCH1		HNSC	4	5	3	264	0.000534952	39.6	1.93992	5.41774
ABCA12	GRIN3A		HNSC	4	5	3	264	0.000534952	39.6	1.93992	5.41774
ABCA12	BAI3		HNSC	4	5	3	264	0.000534952	39.6	1.93992	5.41774
NEB	REV3L		BRCA	21	4	3	870	0.000548561	31.0714	1.87799	4.99458
NTRK1	PHC2		BRCA	4	4	2	888	0.00055203	111	2.74843	6.67063
CAPN1	CDHR2		BRCA	4	4	2	888	0.00055203	111	2.74843	6.67063
RERE	FOXP1	+	BRCA	4	4	2	888	0.00055203	111	2.74843	6.67063
RLF	NUP98		BRCA	4	4	2	888	0.00055203	111	2.74843	6.67063
TRAPPC8	RERE	+	BRCA	4	4	2	888	0.00055203	111	2.74843	6.67063
TRIO	SLC35B2		BRCA	4	4	2	888	0.00055203	111	2.74843	6.67063
PDE4D	ZNF729		BRCA	4	4	2	888	0.00055203	111	2.74843	6.67063
HEPH	ABCC5		BRCA	4	4	2	888	0.00055203	111	2.74843	6.67063
ABCA8	PSIP1	+	BRCA	4	4	2	888	0.00055203	111	2.74843	6.67063
GBF1	DENND5B		BRCA	4	4	2	888	0.00055203	111	2.74843	6.67063
PTHLH	IFT140		BRCA	4	4	2	888	0.00055203	111	2.74843	6.67063
EXOC6	SCYL2		BRCA	4	4	2	888	0.00055203	111	2.74843	6.67063
ERCC6	TMCC1		BRCA	4	4	2	888	0.00055203	111	2.74843	6.67063
OCRL	RNF123		BRCA	4	4	2	888	0.00055203	111	2.74843	6.67063
PDE10A	PRPF6		BRCA	4	4	2	888	0.00055203	111	2.74843	6.67063
PDE4B	ZBTB40		BRCA	4	4	2	888	0.00055203	111	2.74843	6.67063
SEC16A	ANKRD30A		BRCA	4	4	2	888	0.00055203	111	2.74843	6.67063
PLEKHA6	SBNO1		BRCA	4	4	2	888	0.00055203	111	2.74843	6.67063
CD97	TRPM3		BRCA	4	4	2	888	0.00055203	111	2.74843	6.67063
MC1R	MUM1L1		BRCA	4	4	2	888	0.00055203	111	2.74843	6.67063
ATP8B2	OTUD4		BRCA	4	4	2	888	0.00055203	111	2.74843	6.67063
NT5C1B	PDE4D		BRCA	4	4	2	888	0.00055203	111	2.74843	6.67063
DDB1	SMCHD1		BRCA	4	4	2	888	0.00055203	111	2.74843	6.67063
POLA1	LNX1		BRCA	4	4	2	888	0.00055203	111	2.74843	6.67063
NLGN3	TARBP1		BRCA	4	4	2	888	0.00055203	111	2.74843	6.67063
CCPG1	MYO16		BRCA	4	4	2	888	0.00055203	111	2.74843	6.67063
AMPD1	SLC4A3		BRCA	4	4	2	888	0.00055203	111	2.74843	6.67063
CCAR1	SEC16A		BRCA	4	4	2	888	0.00055203	111	2.74843	6.67063
CDK5RAP2	CCAR1		BRCA	4	4	2	888	0.00055203	111	2.74843	6.67063
NPC1	SBNO1		BRCA	4	4	2	888	0.00055203	111	2.74843	6.67063
NPC1	EPPK1		BRCA	4	4	2	888	0.00055203	111	2.74843	6.67063
SIGLEC1	ANKRD30A		BRCA	4	4	2	888	0.00055203	111	2.74843	6.67063
BLK	PLK2		BRCA	4	4	2	888	0.00055203	111	2.74843	6.67063
DGKI	A2M		BRCA	4	4	2	888	0.00055203	111	2.74843	6.67063
MAPRE3	SLC4A3		BRCA	4	4	2	888	0.00055203	111	2.74843	6.67063
ETV5	KDM2A	+	BRCA	4	4	2	888	0.00055203	111	2.74843	6.67063
HEG1	PTPN13		BRCA	4	4	2	888	0.00055203	111	2.74843	6.67063
TLR7	KCNA1		BRCA	4	4	2	888	0.00055203	111	2.74843	6.67063
POTEF	SLC5A9		BRCA	4	4	2	888	0.00055203	111	2.74843	6.67063
POTEF	KRTAP5-1		BRCA	4	4	2	888	0.00055203	111	2.74843	6.67063
MAGEL2	RANBP2		BRCA	4	4	2	888	0.00055203	111	2.74843	6.67063
PCDHA5	ZNF41		BRCA	4	4	2	888	0.00055203	111	2.74843	6.67063
GUCY2F	EFHA2		BRCA	4	4	2	888	0.00055203	111	2.74843	6.67063
FNDC4	SLC4A3		BRCA	4	4	2	888	0.00055203	111	2.74843	6.67063
FNDC4	MAPRE3		BRCA	4	4	2	888	0.00055203	111	2.74843	6.67063
FNDC4	PCDHA5		BRCA	4	4	2	888	0.00055203	111	2.74843	6.67063
SEC14L5	KCNA5		BRCA	4	4	2	888	0.00055203	111	2.74843	6.67063
PABPC4	SEC14L5		BRCA	4	4	2	888	0.00055203	111	2.74843	6.67063
MOV10L1	SEC14L5		BRCA	4	4	2	888	0.00055203	111	2.74843	6.67063
MOV10L1	PABPC4		BRCA	4	4	2	888	0.00055203	111	2.74843	6.67063
MLL4	MAPRE3	+	BRCA	4	4	2	888	0.00055203	111	2.74843	6.67063
CARD11	TDRD6	+	BRCA	4	4	2	888	0.00055203	111	2.74843	6.67063
PLEKHG2	DOCK5		BRCA	4	4	2	888	0.00055203	111	2.74843	6.67063
LRP12	NLRP7		BRCA	4	4	2	888	0.00055203	111	2.74843	6.67063
BPIFB4	MAPRE3		BRCA	4	4	2	888	0.00055203	111	2.74843	6.67063
BPIFB4	CELSR3		BRCA	4	4	2	888	0.00055203	111	2.74843	6.67063
BPIFB4	FNDC4		BRCA	4	4	2	888	0.00055203	111	2.74843	6.67063
BPIFB4	LRP12		BRCA	4	4	2	888	0.00055203	111	2.74843	6.67063
CNOT1	WWP2		BRCA	4	4	2	888	0.00055203	111	2.74843	6.67063
NID1	ABCA4		BRCA	4	4	2	888	0.00055203	111	2.74843	6.67063
C1orf222	PLEC		BRCA	4	4	2	888	0.00055203	111	2.74843	6.67063
COL5A3	RANBP2		BRCA	4	4	2	888	0.00055203	111	2.74843	6.67063
CAMTA2	SLC4A3		BRCA	4	4	2	888	0.00055203	111	2.74843	6.67063
CAMTA2	AMPD1		BRCA	4	4	2	888	0.00055203	111	2.74843	6.67063
ROBO2	RPTOR		BRCA	4	4	2	888	0.00055203	111	2.74843	6.67063
INTS1	LRP12		BRCA	4	4	2	888	0.00055203	111	2.74843	6.67063
NLRC5	NEK5		BRCA	4	4	2	888	0.00055203	111	2.74843	6.67063
WDR7	WHAMMP2		BRCA	4	4	2	888	0.00055203	111	2.74843	6.67063
SPTBN1	WDR7		BRCA	4	4	2	888	0.00055203	111	2.74843	6.67063
PCLO	APC		HNSC	27	5	6	238	0.000561789	10.5778	1.10695	3.61056
PCLO	FAM47C		HNSC	27	5	6	238	0.000561789	10.5778	1.10695	3.61056
FRG1B	KCNA1		BRCA	26	3	3	866	0.000568709	33.3077	1.85859	5.15298
CSMD2	MGAM		BRCA	12	8	3	875	0.000575612	27.3438	1.86445	4.75253
DNAH5	PDE10A		HNSC	26	3	5	242	0.000575745	15.5128	1.25423	4.22911
MACF1	LAMA5		GBM	7	3	3	275	0.00057605	39.2857	1.90342	5.4383
GRM1	NRXN1		HNSC	7	8	4	257	0.000583901	18.3571	1.49427	4.32577
DNAH3	CNTNAP2		HNSC	8	7	4	257	0.000583901	18.3571	1.49427	4.32577
Unknown	MTOR		KIRC	143	7	18	248	0.000587501	4.45954	0.598064	2.39203
FAT4	TGFBR2		HNSC	13	4	4	255	0.000602371	19.6154	1.48254	4.47009
HUWE1	ZC3H4		HNSC	13	4	4	255	0.000602371	19.6154	1.48254	4.47009
FSCB	EEA1		HNSC	9	2	3	262	0.000603701	43.6667	1.86796	5.68521
RASA1	HSP90AB1		HNSC	9	2	3	262	0.000603701	43.6667	1.86796	5.68521
RASA1	MYO1D		HNSC	9	2	3	262	0.000603701	43.6667	1.86796	5.68521
CELSR2	KIAA0649		HNSC	9	2	3	262	0.000603701	43.6667	1.86796	5.68521
ABCA13	BOC		HNSC	9	2	3	262	0.000603701	43.6667	1.86796	5.68521
ABCA13	TACR3		HNSC	9	2	3	262	0.000603701	43.6667	1.86796	5.68521
ABCA13	SELP		HNSC	9	2	3	262	0.000603701	43.6667	1.86796	5.68521
EPHA2	RLF		HNSC	9	2	3	262	0.000603701	43.6667	1.86796	5.68521
AHNAK2	HMHA1		HNSC	9	2	3	262	0.000603701	43.6667	1.86796	5.68521
AHNAK2	MKRN3		HNSC	9	2	3	262	0.000603701	43.6667	1.86796	5.68521
MYCBP2	MYOM2		HNSC	9	2	3	262	0.000603701	43.6667	1.86796	5.68521
MYCBP2	CD1E		HNSC	9	2	3	262	0.000603701	43.6667	1.86796	5.68521
PLXNB2	OR5AR1		HNSC	9	2	3	262	0.000603701	43.6667	1.86796	5.68521
PLXNA1	KIF26B		HNSC	9	2	3	262	0.000603701	43.6667	1.86796	5.68521
EGFR	TMEM121		HNSC	9	2	3	262	0.000603701	43.6667	1.86796	5.68521
CDH19	GFRA1		HNSC	9	2	3	262	0.000603701	43.6667	1.86796	5.68521
CDH19	TACR3		HNSC	9	2	3	262	0.000603701	43.6667	1.86796	5.68521
CDH19	ADAMTS3		HNSC	9	2	3	262	0.000603701	43.6667	1.86796	5.68521
SPTA1	AKAP6		STAD	18	2	5	140	0.000605213	19.4444	1.25584	4.67928
SPTA1	EPHA6		STAD	18	2	5	140	0.000605213	19.4444	1.25584	4.67928
MTOR	NOS1		KIRC	21	4	4	387	0.000609485	18.4286	1.46006	4.36775
SYNE1	CSMD2		COADREAD	20	4	6	156	0.000610157	11.7	1.11149	3.80769
DNAH5	UTP20		HNSC	27	1	4	244	0.000612237	36.1481	1.36051	5.81474
RUNX1T1	RYR2		HNSC	5	19	5	247	0.000615464	13	1.24042	3.88948
DMD	ZNF521		HNSC	16	3	4	253	0.000620232	21.0833	1.46854	4.62843
DMD	RGS7		HNSC	16	3	4	253	0.000620232	21.0833	1.46854	4.62843
SYNE1	ACE		BRCA	22	4	3	869	0.000621246	29.625	1.83299	4.94424
MDN1	TP53BP1	+	BRCA	16	6	3	873	0.00062403	27.2812	1.8347	4.7777
MLL2	LRP1	+	BRCA	10	10	3	875	0.000625038	26.25	1.83475	4.70058
RGS22	USH2A		BRCA	3	27	3	865	0.000630279	32.037	1.82136	5.11243
TNR	ADAMTS16		COADREAD	3	4	3	176	0.000631161	44	1.90183	5.66655
HMCN1	FAM92A3		KIRC	15	2	3	396	0.000648202	39.6	1.8168	5.54086
CSMD3	ERBB2		STAD	24	1	5	135	0.000650334	28.125	1.14612	5.52719
TAF1L	FEZF1	+	HNSC	7	3	3	263	0.000653175	37.5714	1.85863	5.39386
COL4A1	FLT1		HNSC	3	7	3	263	0.000653175	37.5714	1.85863	5.39386
MLL	C6orf204	+	HNSC	7	3	3	263	0.000653175	37.5714	1.85863	5.39386
EPHA5	TRIP11		HNSC	7	3	3	263	0.000653175	37.5714	1.85863	5.39386
DIP2A	MLLT4		HNSC	7	3	3	263	0.000653175	37.5714	1.85863	5.39386
MYO15A	DLC1		HNSC	7	3	3	263	0.000653175	37.5714	1.85863	5.39386
PCDHA13	ATP7A		HNSC	7	3	3	263	0.000653175	37.5714	1.85863	5.39386
MYH11	CD163		HNSC	3	7	3	263	0.000653175	37.5714	1.85863	5.39386
FN1	SCN7A		HNSC	7	3	3	263	0.000653175	37.5714	1.85863	5.39386
CNTNAP5	NLRP3		HNSC	7	3	3	263	0.000653175	37.5714	1.85863	5.39386
ITGA8	CR1		HNSC	7	3	3	263	0.000653175	37.5714	1.85863	5.39386
TRPM6	TCERG1		HNSC	7	3	3	263	0.000653175	37.5714	1.85863	5.39386
ANKRD17	MCF2		HNSC	7	3	3	263	0.000653175	37.5714	1.85863	5.39386
ANKRD17	NRCAM		HNSC	7	3	3	263	0.000653175	37.5714	1.85863	5.39386
CDH6	CTTNBP2		HNSC	3	7	3	263	0.000653175	37.5714	1.85863	5.39386
DRP2	BIRC6		HNSC	3	7	3	263	0.000653175	37.5714	1.85863	5.39386
MGAM	DRP2		HNSC	7	3	3	263	0.000653175	37.5714	1.85863	5.39386
ANKRD30A	ZNF184		HNSC	7	3	3	263	0.000653175	37.5714	1.85863	5.39386
MLL4	CTCF	+	HNSC	3	7	3	263	0.000653175	37.5714	1.85863	5.39386
MAPKBP1	HRAS		HNSC	3	7	3	263	0.000653175	37.5714	1.85863	5.39386
ZFHX4	NUP160		BRCA	19	5	3	871	0.000661676	27.5053	1.81256	4.81619
MUC16	RP1		KIRC	26	3	4	383	0.000667633	19.641	1.42884	4.5264
TLL1	TRPS1		COAD	3	2	3	113	0.000668189	56.5	1.90918	6.1593
FN1	DST		COAD	3	2	3	113	0.000668189	56.5	1.90918	6.1593
TNS1	TGM4		COAD	3	2	3	113	0.000668189	56.5	1.90918	6.1593
FAT1	PKDREJ		HNSC	57	1	6	212	0.000670205	22.3158	0.968151	5.24244
PCLO	KCNT2		STAD	21	3	6	135	0.000677569	12.8571	1.0937	4.0141
TP53	FAM5C		BRCA	262.5	0.5	6.5	630.5	0.000679117	31.2248	0.561117	6.32131
MFI2	TNR		BRCA	3	6	2	887	0.000685943	98.5556	2.62952	6.55172
SDK1	NUAK1		BRCA	6	3	2	887	0.000685943	98.5556	2.62952	6.55172
NCOA6	GVINP1		BRCA	6	3	2	887	0.000685943	98.5556	2.62952	6.55172
C9orf174	ITIH6		BRCA	6	3	2	887	0.000685943	98.5556	2.62952	6.55172
NRXN3	TYRP1		BRCA	6	3	2	887	0.000685943	98.5556	2.62952	6.55172
ARHGAP12	NAV1		BRCA	3	6	2	887	0.000685943	98.5556	2.62952	6.55172
KAT6B	IL6ST		BRCA	6	3	2	887	0.000685943	98.5556	2.62952	6.55172
HEATR7B2	OPRM1		BRCA	6	3	2	887	0.000685943	98.5556	2.62952	6.55172
HEATR7B2	RAB3GAP2		BRCA	6	3	2	887	0.000685943	98.5556	2.62952	6.55172
GGT1	HEATR7B2		BRCA	3	6	2	887	0.000685943	98.5556	2.62952	6.55172
GRIN2A	ARAP3		BRCA	6	3	2	887	0.000685943	98.5556	2.62952	6.55172
GRIN2A	PLCZ1		BRCA	6	3	2	887	0.000685943	98.5556	2.62952	6.55172
DICER1	PLEKHH1		BRCA	3	6	2	887	0.000685943	98.5556	2.62952	6.55172
ZNF292	KCND1		BRCA	6	3	2	887	0.000685943	98.5556	2.62952	6.55172
LRP4	BAX		BRCA	6	3	2	887	0.000685943	98.5556	2.62952	6.55172
LRP4	OR2T27		BRCA	6	3	2	887	0.000685943	98.5556	2.62952	6.55172
KCNJ12	TTC14		BRCA	6	3	2	887	0.000685943	98.5556	2.62952	6.55172
IGSF10	COL17A1		BRCA	6	3	2	887	0.000685943	98.5556	2.62952	6.55172
CCT3	FAM186A		BRCA	3	6	2	887	0.000685943	98.5556	2.62952	6.55172
KIAA0195	AMBRA1		BRCA	6	3	2	887	0.000685943	98.5556	2.62952	6.55172
ASTN1	ZMYM4		BRCA	6	3	2	887	0.000685943	98.5556	2.62952	6.55172
ASTN1	ZFR		BRCA	6	3	2	887	0.000685943	98.5556	2.62952	6.55172
ASTN1	COL15A1		BRCA	6	3	2	887	0.000685943	98.5556	2.62952	6.55172
ADCY9	INPPL1		BRCA	6	3	2	887	0.000685943	98.5556	2.62952	6.55172
ADCY9	TMEM132A		BRCA	6	3	2	887	0.000685943	98.5556	2.62952	6.55172
ADCY9	MKI67		BRCA	6	3	2	887	0.000685943	98.5556	2.62952	6.55172
ATAD2B	PRKCB	+	BRCA	6	3	2	887	0.000685943	98.5556	2.62952	6.55172
ARID4B	RBM14	+	BRCA	6	3	2	887	0.000685943	98.5556	2.62952	6.55172
ZDHHC11B	ARID4B	+	BRCA	3	6	2	887	0.000685943	98.5556	2.62952	6.55172
TRIM46	FLJ43860		BRCA	3	6	2	887	0.000685943	98.5556	2.62952	6.55172
ITGAX	PIK3C2G		BRCA	6	3	2	887	0.000685943	98.5556	2.62952	6.55172
NIPBL	LEPR		BRCA	6	3	2	887	0.000685943	98.5556	2.62952	6.55172
LAMB1	EHMT2	+	BRCA	6	3	2	887	0.000685943	98.5556	2.62952	6.55172
LAMB1	ADAM19		BRCA	6	3	2	887	0.000685943	98.5556	2.62952	6.55172
AIM1	PUM1		BRCA	6	3	2	887	0.000685943	98.5556	2.62952	6.55172
ANKRD20A4	FAM123C		BRCA	6	3	2	887	0.000685943	98.5556	2.62952	6.55172
ANKRD20A4	KIAA1211		BRCA	6	3	2	887	0.000685943	98.5556	2.62952	6.55172
LAMA5	RASGRF1		BRCA	6	3	2	887	0.000685943	98.5556	2.62952	6.55172
CCDC136	EPRS		BRCA	6	3	2	887	0.000685943	98.5556	2.62952	6.55172
CASP8AP2	FXYD3		BRCA	6	3	2	887	0.000685943	98.5556	2.62952	6.55172
CASP8AP2	FATE1		BRCA	6	3	2	887	0.000685943	98.5556	2.62952	6.55172
CASP8AP2	FAM71B		BRCA	6	3	2	887	0.000685943	98.5556	2.62952	6.55172
ANKRD36C	COL15A1		BRCA	6	3	2	887	0.000685943	98.5556	2.62952	6.55172
ANKRD36C	TRIM46		BRCA	6	3	2	887	0.000685943	98.5556	2.62952	6.55172
UTP20	PLA2R1		BRCA	6	3	2	887	0.000685943	98.5556	2.62952	6.55172
UTP20	TNRC6A		BRCA	6	3	2	887	0.000685943	98.5556	2.62952	6.55172
NOTCH1	GRIK2		BRCA	3	6	2	887	0.000685943	98.5556	2.62952	6.55172
NOTCH1	UTP20		BRCA	3	6	2	887	0.000685943	98.5556	2.62952	6.55172
NRXN1	ADAM23		BRCA	6	3	2	887	0.000685943	98.5556	2.62952	6.55172
ASB10	FAM186A		BRCA	3	6	2	887	0.000685943	98.5556	2.62952	6.55172
RHBDF2	KIF4A		BRCA	3	6	2	887	0.000685943	98.5556	2.62952	6.55172
MYO6	SYNM		BRCA	6	3	2	887	0.000685943	98.5556	2.62952	6.55172
PHKA2	CPXM1		BRCA	6	3	2	887	0.000685943	98.5556	2.62952	6.55172
TNXB	CCNB3		BRCA	3	6	2	887	0.000685943	98.5556	2.62952	6.55172
MAP3K12	FLJ43860		BRCA	3	6	2	887	0.000685943	98.5556	2.62952	6.55172
TRRAP	LARP1	+	BRCA	6	3	2	887	0.000685943	98.5556	2.62952	6.55172
TRRAP	NLRP5	+	BRCA	6	3	2	887	0.000685943	98.5556	2.62952	6.55172
NUP160	BRPF3	+	BRCA	6	3	2	887	0.000685943	98.5556	2.62952	6.55172
NLRP9	FAM186A		BRCA	3	6	2	887	0.000685943	98.5556	2.62952	6.55172
UHRF1BP1L	SBF2		BRCA	3	6	2	887	0.000685943	98.5556	2.62952	6.55172
MLL	LARP1	+	BRCA	6	3	2	887	0.000685943	98.5556	2.62952	6.55172
MAGI2	GRIN2A		BRCA	3	6	2	887	0.000685943	98.5556	2.62952	6.55172
MAGI2	MLL	+	BRCA	3	6	2	887	0.000685943	98.5556	2.62952	6.55172
TBC1D8B	CACNA1S		BRCA	6	3	2	887	0.000685943	98.5556	2.62952	6.55172
ZNF469	GRIA4		BRCA	6	3	2	887	0.000685943	98.5556	2.62952	6.55172
THADA	ARID4B	+	BRCA	3	6	2	887	0.000685943	98.5556	2.62952	6.55172
MBD6	TUBBP5	+	BRCA	3	6	2	887	0.000685943	98.5556	2.62952	6.55172
VPRBP	ZFP64		BRCA	3	6	2	887	0.000685943	98.5556	2.62952	6.55172
SLC15A5	LAMB1		BRCA	3	6	2	887	0.000685943	98.5556	2.62952	6.55172
IL11RA	HECTD1		BRCA	3	6	2	887	0.000685943	98.5556	2.62952	6.55172
AKAP13	RASGRF1		BRCA	6	3	2	887	0.000685943	98.5556	2.62952	6.55172
NBEAL2	COL16A1		BRCA	6	3	2	887	0.000685943	98.5556	2.62952	6.55172
NBEAL2	TRIM46		BRCA	6	3	2	887	0.000685943	98.5556	2.62952	6.55172
COL6A3	EHMT2	+	BRCA	6	3	2	887	0.000685943	98.5556	2.62952	6.55172
DOCK3	OSBPL8		BRCA	6	3	2	887	0.000685943	98.5556	2.62952	6.55172
DOCK3	FATE1		BRCA	6	3	2	887	0.000685943	98.5556	2.62952	6.55172
PCDHA11	PHLDB1		BRCA	3	6	2	887	0.000685943	98.5556	2.62952	6.55172
SUV420H1	LRRIQ1	+	BRCA	3	6	2	887	0.000685943	98.5556	2.62952	6.55172
FHOD3	PIKFYVE		BRCA	6	3	2	887	0.000685943	98.5556	2.62952	6.55172
EP400	DOCK4	+	BRCA	3	6	2	887	0.000685943	98.5556	2.62952	6.55172
CDC42BPG	SHANK2		BRCA	3	6	2	887	0.000685943	98.5556	2.62952	6.55172
DLC1	ADAMTSL3		BRCA	6	3	2	887	0.000685943	98.5556	2.62952	6.55172
VWA3A	PIKFYVE		BRCA	6	3	2	887	0.000685943	98.5556	2.62952	6.55172
GOLGB1	ROBO1		BRCA	6	3	2	887	0.000685943	98.5556	2.62952	6.55172
LRFN2	SPTAN1		BRCA	3	6	2	887	0.000685943	98.5556	2.62952	6.55172
ABCC8	FADS2		BRCA	6	3	2	887	0.000685943	98.5556	2.62952	6.55172
HCN4	SETX		BRCA	3	6	2	887	0.000685943	98.5556	2.62952	6.55172
LINGO2	PTPRF		BRCA	6	3	2	887	0.000685943	98.5556	2.62952	6.55172
LINGO2	ECE2		BRCA	6	3	2	887	0.000685943	98.5556	2.62952	6.55172
LINGO2	SEL1L2		BRCA	6	3	2	887	0.000685943	98.5556	2.62952	6.55172
YLPM1	NUAK1		BRCA	6	3	2	887	0.000685943	98.5556	2.62952	6.55172
EMR2	ARHGAP11A		BRCA	6	3	2	887	0.000685943	98.5556	2.62952	6.55172
ANO4	PLEKHH1		BRCA	3	6	2	887	0.000685943	98.5556	2.62952	6.55172
PLXNA1	TRPC4AP		BRCA	6	3	2	887	0.000685943	98.5556	2.62952	6.55172
ATHL1	PMEL		BRCA	6	3	2	887	0.000685943	98.5556	2.62952	6.55172
HLA-DRB6	BCMO1		BRCA	6	3	2	887	0.000685943	98.5556	2.62952	6.55172
TLN1	TCP10		BRCA	6	3	2	887	0.000685943	98.5556	2.62952	6.55172
STON1-GTF2A1L	TLN1		BRCA	3	6	2	887	0.000685943	98.5556	2.62952	6.55172
PCDHB7	BNC2		BRCA	6	3	2	887	0.000685943	98.5556	2.62952	6.55172
C15orf55	GRID2		BRCA	3	6	2	887	0.000685943	98.5556	2.62952	6.55172
GRIK5	ZNF292		BRCA	3	6	2	887	0.000685943	98.5556	2.62952	6.55172
UBN2	NBAS		BRCA	3	6	2	887	0.000685943	98.5556	2.62952	6.55172
FRG1	ZFR		BRCA	6	3	2	887	0.000685943	98.5556	2.62952	6.55172
GPR179	LAMA5		BRCA	3	6	2	887	0.000685943	98.5556	2.62952	6.55172
PPRC1	SALL1		BRCA	3	6	2	887	0.000685943	98.5556	2.62952	6.55172
FAM135B	FXYD3		BRCA	6	3	2	887	0.000685943	98.5556	2.62952	6.55172
MYO3A	NLRP12		BRCA	6	3	2	887	0.000685943	98.5556	2.62952	6.55172
MYO3A	FAM71B		BRCA	6	3	2	887	0.000685943	98.5556	2.62952	6.55172
MYO3A	ADAMTS13		BRCA	6	3	2	887	0.000685943	98.5556	2.62952	6.55172
ESF1	KIF1A		BRCA	3	6	2	887	0.000685943	98.5556	2.62952	6.55172
DZANK1	NRXN3		BRCA	3	6	2	887	0.000685943	98.5556	2.62952	6.55172
DCST1	CBLB		BRCA	3	6	2	887	0.000685943	98.5556	2.62952	6.55172
PREX1	NBEAL2		BRCA	3	6	2	887	0.000685943	98.5556	2.62952	6.55172
PREX1	DOCK4		BRCA	3	6	2	887	0.000685943	98.5556	2.62952	6.55172
AHCTF1	KRAS		BRCA	6	3	2	887	0.000685943	98.5556	2.62952	6.55172
AHCTF1	ELL2		BRCA	6	3	2	887	0.000685943	98.5556	2.62952	6.55172
DSCAM	ZNF217		BRCA	6	3	2	887	0.000685943	98.5556	2.62952	6.55172
KDM5B	CDC42BPA	+	BRCA	3	6	2	887	0.000685943	98.5556	2.62952	6.55172
HMCN1	DNAH9		OV	11	2	3	296	0.000687799	40.3636	1.81019	5.58567
RYR1	MUC4		GBM	2	10	3	273	0.000688179	40.95	1.8151	5.6096
MLL2	HTR1A	+	HNSC	43	1	5	227	0.000692781	26.3953	1.10151	5.44487
ARID1A	KRAS	+	UCEC	31	7	12	103	0.000697173	5.69585	0.724774	2.7547
RYR2	PXDNL		BRCA	23	4	3	868	0.000699889	28.3043	1.78983	4.8962
TSHZ2	PCDH11X		GBM	4	6	3	275	0.000700064	34.375	1.83581	5.23885
DNAH2	PKHD1L1		BRCA	8	13	3	874	0.000703671	25.2115	1.79181	4.66279
PKHD1L1	NAV2		HNSC	21	2	4	249	0.000706079	23.7143	1.41121	4.92095
PKHD1L1	PCDHGA1		HNSC	21	2	4	249	0.000706079	23.7143	1.41121	4.92095
MLL4	CASP8	+	HNSC	2	21	4	249	0.000706079	23.7143	1.41121	4.92095
CSMD3	NLRP12		HNSC	46	2	6	222	0.000715248	14.4783	1.04112	4.30418
CDH1	RHOA		STAD	9	6	5	145	0.000721222	13.4259	1.23266	3.96171
GRIK5	CYLC1		STAD	2	5	3	155	0.000726853	46.5	1.84084	5.83806
FSHR	TCERG1L		STAD	5	2	3	155	0.000726853	46.5	1.84084	5.83806
ZFP28	MUC5B		STAD	2	5	3	155	0.000726853	46.5	1.84084	5.83806
PKDREJ	LRRC7		STAD	2	5	3	155	0.000726853	46.5	1.84084	5.83806
THSD7B	PCDHB3		STAD	5	2	3	155	0.000726853	46.5	1.84084	5.83806
TIAM1	SSTR4		STAD	5	2	3	155	0.000726853	46.5	1.84084	5.83806
ZNF521	TIAM1		STAD	2	5	3	155	0.000726853	46.5	1.84084	5.83806
PCDH17	NUP153		STAD	5	2	3	155	0.000726853	46.5	1.84084	5.83806
LRRIQ3	ELTD1		STAD	2	5	3	155	0.000726853	46.5	1.84084	5.83806
SPHKAP	FSHR		STAD	2	5	3	155	0.000726853	46.5	1.84084	5.83806
FCGBP	TIAM2		STAD	5	2	3	155	0.000726853	46.5	1.84084	5.83806
FCGBP	RIT2		STAD	5	2	3	155	0.000726853	46.5	1.84084	5.83806
CD1E	ELTD1		STAD	2	5	3	155	0.000726853	46.5	1.84084	5.83806
COL1A2	OR4N3P		STAD	5	2	3	155	0.000726853	46.5	1.84084	5.83806
SPEF2	SNTG2		STAD	5	2	3	155	0.000726853	46.5	1.84084	5.83806
GRM5	EYS		STAD	5	2	3	155	0.000726853	46.5	1.84084	5.83806
MXRA5	ATP10A		STAD	5	2	3	155	0.000726853	46.5	1.84084	5.83806
DCAF12L2	ZNF85		STAD	5	2	3	155	0.000726853	46.5	1.84084	5.83806
HUWE1	ASH1L	+	BRCA	17	6	3	872	0.000730429	25.6471	1.77774	4.71112
ARID1A	COL22A1	+	BRCA	17	6	3	872	0.000730429	25.6471	1.77774	4.71112
HECTD4	KIAA0913		BRCA	17	6	3	872	0.000730429	25.6471	1.77774	4.71112
NBPF9	RRN3P3		STAD	9	3	4	149	0.000732406	22.0741	1.4532	4.73561
NBEA	AFF2		STAD	9	3	4	149	0.000732406	22.0741	1.4532	4.73561
MYH13	CSMD3		GBM	5	5	3	275	0.000744756	33	1.81391	5.17911
TTN	TLR4		BRCA	118	2	5	773	0.000746908	16.3771	1.14463	4.44714
TTN	PDE3A		BRCA	118	2	5	773	0.000746908	16.3771	1.14463	4.44714
ARID1A	PIK3CA	+	STAD	10	15	8	132	0.000755618	7.04	0.879428	3.02379
CTCF	CASP8		HNSC	5	20	5	246	0.000756867	12.3	1.18887	3.83033
EP300	PKDREJ	+	HNSC	17	3	4	252	0.000759106	19.7647	1.40841	4.55938
OTOF	SPHKAP		BRCA	12	9	3	874	0.000759752	24.2778	1.76411	4.61501
BACH2	MYH8		BRCA	9	12	3	874	0.000759752	24.2778	1.76411	4.61501
DNAH9	TMEM132D		STAD	6	5	4	150	0.000763003	20	1.44828	4.54318
ADAMTS16	FLJ36000		STAD	6	5	4	150	0.000763003	20	1.44828	4.54318
TTN	GRIA1		COADREAD	52.5	0.5	6.5	128.5	0.000763519	31.819	0.565711	6.35442
MALAT1	MYO16		HNSC	14	4	4	254	0.000765054	18.1429	1.41156	4.38499
LOC284232	LAMC2		KIRC	16	2	3	395	0.000766872	37.0312	1.75403	5.46949
ANKAR	NTRK1		BRCA	5	4	2	887	0.000770537	88.7	2.57375	6.39676
HDAC6	KCNMA1	+	BRCA	5	4	2	887	0.000770537	88.7	2.57375	6.39676
PCDHA2	IREB2		BRCA	5	4	2	887	0.000770537	88.7	2.57375	6.39676
ACE	MYH1		BRCA	5	4	2	887	0.000770537	88.7	2.57375	6.39676
REV3L	LETM1		BRCA	5	4	2	887	0.000770537	88.7	2.57375	6.39676
TRIO	FCRL5		BRCA	4	5	2	887	0.000770537	88.7	2.57375	6.39676
CDH12	DNAJC13		BRCA	4	5	2	887	0.000770537	88.7	2.57375	6.39676
PDE4D	ACTN2		BRCA	4	5	2	887	0.000770537	88.7	2.57375	6.39676
MORC1	PXDNL		BRCA	4	5	2	887	0.000770537	88.7	2.57375	6.39676
RIPK1	WDR96		BRCA	5	4	2	887	0.000770537	88.7	2.57375	6.39676
SMTN	CDHR2		BRCA	5	4	2	887	0.000770537	88.7	2.57375	6.39676
SMTN	SLC4A3		BRCA	5	4	2	887	0.000770537	88.7	2.57375	6.39676
CCDC74A	SMTN		BRCA	4	5	2	887	0.000770537	88.7	2.57375	6.39676
DAB2IP	DOCK8		BRCA	4	5	2	887	0.000770537	88.7	2.57375	6.39676
SPATA1	TARBP1		BRCA	5	4	2	887	0.000770537	88.7	2.57375	6.39676
LMTK2	EXOC6		BRCA	5	4	2	887	0.000770537	88.7	2.57375	6.39676
TRPM5	DENND5B		BRCA	5	4	2	887	0.000770537	88.7	2.57375	6.39676
QRICH2	PRDM1	+	BRCA	4	5	2	887	0.000770537	88.7	2.57375	6.39676
XRRA1	MYH1		BRCA	5	4	2	887	0.000770537	88.7	2.57375	6.39676
FBXW10	CHD1L		BRCA	4	5	2	887	0.000770537	88.7	2.57375	6.39676
SLC6A10P	ATP10A		BRCA	4	5	2	887	0.000770537	88.7	2.57375	6.39676
ADCY5	HPS3		BRCA	4	5	2	887	0.000770537	88.7	2.57375	6.39676
CADM2	KCNT2		BRCA	4	5	2	887	0.000770537	88.7	2.57375	6.39676
SRRT	VWA3B		BRCA	4	5	2	887	0.000770537	88.7	2.57375	6.39676
BPTF	QRICH2	+	BRCA	5	4	2	887	0.000770537	88.7	2.57375	6.39676
FER1L6	ANKRD30B		BRCA	5	4	2	887	0.000770537	88.7	2.57375	6.39676
HIVEP1	DOCK5		BRCA	5	4	2	887	0.000770537	88.7	2.57375	6.39676
DOPEY1	PSIP1	+	BRCA	5	4	2	887	0.000770537	88.7	2.57375	6.39676
ZNF536	SCYL2		BRCA	5	4	2	887	0.000770537	88.7	2.57375	6.39676
BORA	ZNF536		BRCA	4	5	2	887	0.000770537	88.7	2.57375	6.39676
PCDHB18	NTRK1		BRCA	5	4	2	887	0.000770537	88.7	2.57375	6.39676
PCDHB18	OTUD4		BRCA	5	4	2	887	0.000770537	88.7	2.57375	6.39676
DIAPH2	PCDHB18		BRCA	4	5	2	887	0.000770537	88.7	2.57375	6.39676
CCPG1	TMTC4		BRCA	4	5	2	887	0.000770537	88.7	2.57375	6.39676
EPG5	TRIM49C		BRCA	5	4	2	887	0.000770537	88.7	2.57375	6.39676
PER3	HDAC6	+	BRCA	4	5	2	887	0.000770537	88.7	2.57375	6.39676
CRAT	ATP10D		BRCA	5	4	2	887	0.000770537	88.7	2.57375	6.39676
MYOF	STARD9		BRCA	5	4	2	887	0.000770537	88.7	2.57375	6.39676
KDM2A	MYOF	+	BRCA	4	5	2	887	0.000770537	88.7	2.57375	6.39676
KIAA1239	AMPH		BRCA	4	5	2	887	0.000770537	88.7	2.57375	6.39676
CREBBP	XRN1	+	BRCA	5	4	2	887	0.000770537	88.7	2.57375	6.39676
CREBBP	KIAA1239	+	BRCA	5	4	2	887	0.000770537	88.7	2.57375	6.39676
TRPM6	ANKRD17		BRCA	5	4	2	887	0.000770537	88.7	2.57375	6.39676
HIVEP3	UNC13A		BRCA	4	5	2	887	0.000770537	88.7	2.57375	6.39676
DOT1L	FGFR2	+	BRCA	4	5	2	887	0.000770537	88.7	2.57375	6.39676
CATSPER2	NLGN4X		BRCA	4	5	2	887	0.000770537	88.7	2.57375	6.39676
HLA-B	UNC13A		BRCA	4	5	2	887	0.000770537	88.7	2.57375	6.39676
SPEG	GPR125		BRCA	5	4	2	887	0.000770537	88.7	2.57375	6.39676
MAPRE3	RIPK1		BRCA	4	5	2	887	0.000770537	88.7	2.57375	6.39676
MAPRE3	SMTN		BRCA	4	5	2	887	0.000770537	88.7	2.57375	6.39676
MAPRE3	VWA3B		BRCA	4	5	2	887	0.000770537	88.7	2.57375	6.39676
LOXL3	MAPRE3		BRCA	5	4	2	887	0.000770537	88.7	2.57375	6.39676
ILF3	MAPRE3		BRCA	5	4	2	887	0.000770537	88.7	2.57375	6.39676
ETV5	MYOF		BRCA	4	5	2	887	0.000770537	88.7	2.57375	6.39676
TRANK1	GPRASP2		BRCA	4	5	2	887	0.000770537	88.7	2.57375	6.39676
TRANK1	NYNRIN		BRCA	4	5	2	887	0.000770537	88.7	2.57375	6.39676
TINAG	THSD7A		BRCA	4	5	2	887	0.000770537	88.7	2.57375	6.39676
ADAMTS2	C3		BRCA	5	4	2	887	0.000770537	88.7	2.57375	6.39676
ABCA4	ADAMTS2		BRCA	4	5	2	887	0.000770537	88.7	2.57375	6.39676
ANKRD11	MICAL3		BRCA	5	4	2	887	0.000770537	88.7	2.57375	6.39676
ACLY	FBN2		BRCA	5	4	2	887	0.000770537	88.7	2.57375	6.39676
PRKG2	SOGA1		BRCA	5	4	2	887	0.000770537	88.7	2.57375	6.39676
PRKG2	INSRR		BRCA	5	4	2	887	0.000770537	88.7	2.57375	6.39676
PTCH1	ARHGAP5		BRCA	5	4	2	887	0.000770537	88.7	2.57375	6.39676
CELSR3	GPSM2		BRCA	4	5	2	887	0.000770537	88.7	2.57375	6.39676
PDE3A	CDH12		BRCA	5	4	2	887	0.000770537	88.7	2.57375	6.39676
COL27A1	PRPF8		BRCA	5	4	2	887	0.000770537	88.7	2.57375	6.39676
POTEJ	FXR1	+	BRCA	4	5	2	887	0.000770537	88.7	2.57375	6.39676
IMPG1	POTEJ		BRCA	5	4	2	887	0.000770537	88.7	2.57375	6.39676
ARHGAP35	KCNA1		BRCA	5	4	2	887	0.000770537	88.7	2.57375	6.39676
SPAG17	GIMAP8		BRCA	4	5	2	887	0.000770537	88.7	2.57375	6.39676
SPAG17	NRIP1		BRCA	4	5	2	887	0.000770537	88.7	2.57375	6.39676
SPAG17	FARP2		BRCA	4	5	2	887	0.000770537	88.7	2.57375	6.39676
BPIFB4	SMTN		BRCA	4	5	2	887	0.000770537	88.7	2.57375	6.39676
ZNF658	ANKAR		BRCA	4	5	2	887	0.000770537	88.7	2.57375	6.39676
SZT2	MAGEE1		BRCA	5	4	2	887	0.000770537	88.7	2.57375	6.39676
SZT2	SCYL2		BRCA	5	4	2	887	0.000770537	88.7	2.57375	6.39676
NBPF14	DMXL1		BRCA	4	5	2	887	0.000770537	88.7	2.57375	6.39676
ENPP2	PXDN		BRCA	4	5	2	887	0.000770537	88.7	2.57375	6.39676
AP1G2	PLXNA3		BRCA	5	4	2	887	0.000770537	88.7	2.57375	6.39676
BAI3	CNKSR2		BRCA	5	4	2	887	0.000770537	88.7	2.57375	6.39676
BAI3	C1orf222		BRCA	5	4	2	887	0.000770537	88.7	2.57375	6.39676
CHD9	WWC3	+	BRCA	5	4	2	887	0.000770537	88.7	2.57375	6.39676
MYO15A	CUL9		BRCA	5	4	2	887	0.000770537	88.7	2.57375	6.39676
GCC2	TCF20	+	BRCA	4	5	2	887	0.000770537	88.7	2.57375	6.39676
CACNA1D	TINAG		BRCA	5	4	2	887	0.000770537	88.7	2.57375	6.39676
ARHGEF1	PARP8		BRCA	4	5	2	887	0.000770537	88.7	2.57375	6.39676
IL1RAPL1	RBM19		BRCA	4	5	2	887	0.000770537	88.7	2.57375	6.39676
NBEAL1	GUCY2F		BRCA	5	4	2	887	0.000770537	88.7	2.57375	6.39676
ZNF804B	RNF123		BRCA	5	4	2	887	0.000770537	88.7	2.57375	6.39676
SMARCA1	C3	+	BRCA	5	4	2	887	0.000770537	88.7	2.57375	6.39676
GOLGA3	DAB2IP		BRCA	5	4	2	887	0.000770537	88.7	2.57375	6.39676
TTC39A	PDE3A		BRCA	4	5	2	887	0.000770537	88.7	2.57375	6.39676
KCNU1	ROS1		BRCA	5	4	2	887	0.000770537	88.7	2.57375	6.39676
IRS4	KCNU1		BRCA	4	5	2	887	0.000770537	88.7	2.57375	6.39676
BDP1	WDR7		BRCA	5	4	2	887	0.000770537	88.7	2.57375	6.39676
PTEN	C15orf2		GBM	83.5	0.5	6.5	199.5	0.000772678	31.0599	0.548101	6.32373
TSGA10	LOC442421		HNSC	2	10	3	261	0.000780398	39.15	1.76998	5.56482
XIST	KCNV1		HNSC	10	2	3	261	0.000780398	39.15	1.76998	5.56482
POM121L9P	C10orf12		HNSC	10	2	3	261	0.000780398	39.15	1.76998	5.56482
CROCCL1	NUP205		HNSC	10	2	3	261	0.000780398	39.15	1.76998	5.56482
ARFGEF1	COL22A1		HNSC	2	10	3	261	0.000780398	39.15	1.76998	5.56482
POTEC	HGF		HNSC	10	2	3	261	0.000780398	39.15	1.76998	5.56482
DYSF	XIST		HNSC	2	10	3	261	0.000780398	39.15	1.76998	5.56482
SFMBT2	CROCCL1	+	HNSC	2	10	3	261	0.000780398	39.15	1.76998	5.56482
HEATR5A	HLA-A		HNSC	2	10	3	261	0.000780398	39.15	1.76998	5.56482
GSN	CROCCL1		HNSC	2	10	3	261	0.000780398	39.15	1.76998	5.56482
ADAMTS12	COL22A1		HNSC	2	10	3	261	0.000780398	39.15	1.76998	5.56482
PRDM9	COL15A1	+	HNSC	10	2	3	261	0.000780398	39.15	1.76998	5.56482
MUC4	PTPRZ1		HNSC	10	2	3	261	0.000780398	39.15	1.76998	5.56482
RYR1	ST6GAL2		HNSC	10	2	3	261	0.000780398	39.15	1.76998	5.56482
VPS13D	POTEH		HNSC	10	2	3	261	0.000780398	39.15	1.76998	5.56482
BRCA2	MAP2		OV	7	4	3	298	0.000782151	31.9286	1.7894	5.13761
DMD	ZNF804B		BRCA	24	4	3	867	0.000784695	27.0938	1.74836	4.85025
LOC646214	NBEA		STAD	7	8	5	145	0.000786341	12.9464	1.21033	3.91131
PCLO	PDE10A		HNSC	28	3	5	240	0.000788234	14.2857	1.17533	4.14319
PCLO	NLRP12		HNSC	28	3	5	240	0.000788234	14.2857	1.17533	4.14319
CHD6	USP34	+	BRCA	10	11	3	874	0.000788815	23.8364	1.75053	4.59189
PCLO	UHRF1BP1L		HNSC	29	1	4	242	0.000791122	33.3793	1.283	5.73287
PIK3CA	CBFB		BRCA	266	6	13	613	0.000791413	4.99311	0.630059	2.58606
ADCY2	TEX15		HNSC	6	4	3	263	0.000793513	32.875	1.79101	5.19442
DMBT1	CNOT1		HNSC	4	6	3	263	0.000793513	32.875	1.79101	5.19442
PRUNE2	DOK6		HNSC	6	4	3	263	0.000793513	32.875	1.79101	5.19442
SSPO	FUT9		HNSC	6	4	3	263	0.000793513	32.875	1.79101	5.19442
UNC5C	NLGN1		HNSC	6	4	3	263	0.000793513	32.875	1.79101	5.19442
GRIA2	MYH10		HNSC	4	6	3	263	0.000793513	32.875	1.79101	5.19442
CFH	PER3		HNSC	6	4	3	263	0.000793513	32.875	1.79101	5.19442
MYO18B	KCNN2		HNSC	6	4	3	263	0.000793513	32.875	1.79101	5.19442
RIMBP2	PKDREJ		HNSC	6	4	3	263	0.000793513	32.875	1.79101	5.19442
ARID5B	PLCL1		HNSC	6	4	3	263	0.000793513	32.875	1.79101	5.19442
KCNB2	SEMA3E		HNSC	6	4	3	263	0.000793513	32.875	1.79101	5.19442
KCNB2	NCOR2		HNSC	6	4	3	263	0.000793513	32.875	1.79101	5.19442
DCHS2	NID2		HNSC	4	6	3	263	0.000793513	32.875	1.79101	5.19442
SVIL	ADCY1		HNSC	4	6	3	263	0.000793513	32.875	1.79101	5.19442
C15orf2	TAF1	+	HNSC	6	4	3	263	0.000793513	32.875	1.79101	5.19442
RUNX1	ASXL1	+	LAML	13	1	4	118	0.000804061	36.3077	1.32707	5.85699
TTN	PLCB1		HNSC	104	1	10	161	0.000805102	15.4808	0.669198	4.81
CTNND2	PRUNE2		HNSC	12	5	4	255	0.000809531	17	1.39658	4.26985
PEG3	TNIK		HNSC	12	5	4	255	0.000809531	17	1.39658	4.26985
PTPN14	KALRN		HNSC	5	12	4	255	0.000809531	17	1.39658	4.26985
CFH	CTNND2		HNSC	5	12	4	255	0.000809531	17	1.39658	4.26985
DNAH5	TLL1		STAD	12	2	4	147	0.000810728	24.5	1.40216	4.99519
DNAH5	CRB1		STAD	12	2	4	147	0.000810728	24.5	1.40216	4.99519
PAPPA2	XIST		HNSC	14	8	5	249	0.000815926	11.1161	1.16809	3.64869
SPTA1	VWF		GBM	23	2	4	259	0.000820188	22.5217	1.36432	4.86464
MUC4	CRB1		KIRC	69	1	5	341	0.000820263	24.7101	1.04461	5.36982
RYR2	SETD2	+	OV	9	3	3	297	0.000821333	33	1.76421	5.2288
DMXL2	LRP1B		OV	3	9	3	297	0.000821333	33	1.76421	5.2288
MST1P2	FAM86C1		LGG	21	1	4	177	0.000843128	33.7143	1.28037	5.75547
KIAA1409	HEPH		HNSC	5	5	3	263	0.000844072	31.56	1.7691	5.13468
GRM8	USP9X		HNSC	5	5	3	263	0.000844072	31.56	1.7691	5.13468
DPPA2	PLCH1		HNSC	5	5	3	263	0.000844072	31.56	1.7691	5.13468
POM121L12	HEPH		HNSC	5	5	3	263	0.000844072	31.56	1.7691	5.13468
PDE3A	SRRT		HNSC	5	5	3	263	0.000844072	31.56	1.7691	5.13468
TIAM2	BSN		HNSC	5	5	3	263	0.000844072	31.56	1.7691	5.13468
DNAH17	SOBP		HNSC	5	5	3	263	0.000844072	31.56	1.7691	5.13468
PCDHA1	CCDC40		HNSC	5	5	3	263	0.000844072	31.56	1.7691	5.13468
MYH13	ANO4		HNSC	5	5	3	263	0.000844072	31.56	1.7691	5.13468
CSPP1	ZNF750		HNSC	5	5	3	263	0.000844072	31.56	1.7691	5.13468
MYH4	ARID1A	+	HNSC	5	5	3	263	0.000844072	31.56	1.7691	5.13468
DST	TP53BP1	+	BRCA	18	6	3	871	0.000847842	24.1944	1.72372	4.64853
LRP2	COL5A1		BRCA	18	6	3	871	0.000847842	24.1944	1.72372	4.64853
EPHA2	ABCA13		HNSC	8	8	4	256	0.000854948	16	1.38126	4.16392
ZNF208	ZNF844		PRAD	5	4	3	223	0.000859723	33.45	1.77037	5.24973
PCDH15	KRTAP4-11		PRAD	4	5	3	223	0.000859723	33.45	1.77037	5.24973
NEB	UTP20		BRCA	21	5	3	869	0.000862272	24.8286	1.7166	4.70739
TTN	RYR2		UCEC	10	5	5	133	0.00086388	13.3	1.19145	3.98407
GPR98	FAM71B		GBM	11	2	3	272	0.000871139	37.0909	1.72533	5.50141
PCDHA8	SYNE1		GBM	2	11	3	272	0.000871139	37.0909	1.72533	5.50141
CNTNAP2	NOTCH2		GBM	11	2	3	272	0.000871139	37.0909	1.72533	5.50141
DNAH7	HIF3A		BRCA	7	3	2	886	0.000879952	84.381	2.4977	6.37299
ADAMTSL3	BCOR		BRCA	3	7	2	886	0.000879952	84.381	2.4977	6.37299
DTX2P1-UPK3BP1-PMS2P11	DNAH7		BRCA	3	7	2	886	0.000879952	84.381	2.4977	6.37299
TRABD2A	DNAH7		BRCA	3	7	2	886	0.000879952	84.381	2.4977	6.37299
CCDC144A	INADL		BRCA	7	3	2	886	0.000879952	84.381	2.4977	6.37299
DHX37	ITSN2		BRCA	3	7	2	886	0.000879952	84.381	2.4977	6.37299
NFASC	DNM1		BRCA	7	3	2	886	0.000879952	84.381	2.4977	6.37299
TNS1	TNRC6A		BRCA	7	3	2	886	0.000879952	84.381	2.4977	6.37299
FREM1	OTUD7B		BRCA	7	3	2	886	0.000879952	84.381	2.4977	6.37299
FREM1	TARS		BRCA	7	3	2	886	0.000879952	84.381	2.4977	6.37299
DNAH11	POGZ		BRCA	7	3	2	886	0.000879952	84.381	2.4977	6.37299
STAB1	RREB1		BRCA	7	3	2	886	0.000879952	84.381	2.4977	6.37299
CPXM1	FBN1		BRCA	3	7	2	886	0.000879952	84.381	2.4977	6.37299
ACACB	OPRM1		BRCA	7	3	2	886	0.000879952	84.381	2.4977	6.37299
ACACB	TRPC4AP		BRCA	7	3	2	886	0.000879952	84.381	2.4977	6.37299
THEM5	ZDHHC11B		BRCA	7	3	2	886	0.000879952	84.381	2.4977	6.37299
FAM123C	ZNF407		BRCA	3	7	2	886	0.000879952	84.381	2.4977	6.37299
CD163L1	DENND3		BRCA	7	3	2	886	0.000879952	84.381	2.4977	6.37299
FAM75D1	VILL		BRCA	7	3	2	886	0.000879952	84.381	2.4977	6.37299
FAM75D1	MRE11A		BRCA	7	3	2	886	0.000879952	84.381	2.4977	6.37299
RASGRF1	PKD1L2		BRCA	3	7	2	886	0.000879952	84.381	2.4977	6.37299
ERBB3	PASK		BRCA	7	3	2	886	0.000879952	84.381	2.4977	6.37299
COL5A1	IL13RA2		BRCA	7	3	2	886	0.000879952	84.381	2.4977	6.37299
MUC19	GVINP1		BRCA	7	3	2	886	0.000879952	84.381	2.4977	6.37299
MUC19	ZNF300P1		BRCA	7	3	2	886	0.000879952	84.381	2.4977	6.37299
SDHAP2	ZNF733P		BRCA	7	3	2	886	0.000879952	84.381	2.4977	6.37299
BRCA1	UNC80		BRCA	7	3	2	886	0.000879952	84.381	2.4977	6.37299
BRD8	COL5A1	+	BRCA	3	7	2	886	0.000879952	84.381	2.4977	6.37299
ASH1L	VCPIP1	+	BRCA	7	3	2	886	0.000879952	84.381	2.4977	6.37299
ASH1L	OSMR	+	BRCA	7	3	2	886	0.000879952	84.381	2.4977	6.37299
ASH1L	OGDHL	+	BRCA	7	3	2	886	0.000879952	84.381	2.4977	6.37299
ASH1L	BRD8	+	BRCA	7	3	2	886	0.000879952	84.381	2.4977	6.37299
MAP3K12	STAB1		BRCA	3	7	2	886	0.000879952	84.381	2.4977	6.37299
GRIN2B	MAPK4		BRCA	7	3	2	886	0.000879952	84.381	2.4977	6.37299
C2orf16	GRIN2B		BRCA	3	7	2	886	0.000879952	84.381	2.4977	6.37299
PLCH1	ARAP3		BRCA	7	3	2	886	0.000879952	84.381	2.4977	6.37299
PREX2	HJURP	+	BRCA	7	3	2	886	0.000879952	84.381	2.4977	6.37299
DNAH10	MARK1		BRCA	7	3	2	886	0.000879952	84.381	2.4977	6.37299
SLC15A5	ITSN2		BRCA	3	7	2	886	0.000879952	84.381	2.4977	6.37299
MYO18B	TRABD2A		BRCA	7	3	2	886	0.000879952	84.381	2.4977	6.37299
ABCA9	NUAK1		BRCA	7	3	2	886	0.000879952	84.381	2.4977	6.37299
ABCA9	CCDC27		BRCA	7	3	2	886	0.000879952	84.381	2.4977	6.37299
NCF2	UBE4B		BRCA	3	7	2	886	0.000879952	84.381	2.4977	6.37299
CACNA1C	UTP14A		BRCA	7	3	2	886	0.000879952	84.381	2.4977	6.37299
ATP2B1	ASXL2	+	BRCA	3	7	2	886	0.000879952	84.381	2.4977	6.37299
CTTNBP2	SLC8A1		BRCA	7	3	2	886	0.000879952	84.381	2.4977	6.37299
AKR1CL1	KIAA0319		BRCA	7	3	2	886	0.000879952	84.381	2.4977	6.37299
MPDZ	STAG2		BRCA	3	7	2	886	0.000879952	84.381	2.4977	6.37299
C1orf101	BAX		BRCA	7	3	2	886	0.000879952	84.381	2.4977	6.37299
C1orf101	ZNF300P1		BRCA	7	3	2	886	0.000879952	84.381	2.4977	6.37299
TEP1	RRNAD1		BRCA	7	3	2	886	0.000879952	84.381	2.4977	6.37299
TEP1	RASGRF1		BRCA	7	3	2	886	0.000879952	84.381	2.4977	6.37299
PTPRU	RIF1		BRCA	3	7	2	886	0.000879952	84.381	2.4977	6.37299
SUV420H1	GOLGA6L6	+	BRCA	3	7	2	886	0.000879952	84.381	2.4977	6.37299
TPR	DOCK9		BRCA	7	3	2	886	0.000879952	84.381	2.4977	6.37299
CCDC171	NFASC		BRCA	3	7	2	886	0.000879952	84.381	2.4977	6.37299
BRWD1	CCDC171	+	BRCA	7	3	2	886	0.000879952	84.381	2.4977	6.37299
AHNAK	IGF2R		BRCA	7	3	2	886	0.000879952	84.381	2.4977	6.37299
AHNAK	PRKCB		BRCA	7	3	2	886	0.000879952	84.381	2.4977	6.37299
AHNAK	USP29		BRCA	7	3	2	886	0.000879952	84.381	2.4977	6.37299
TCHH	ZNF718		BRCA	7	3	2	886	0.000879952	84.381	2.4977	6.37299
FLNB	OTUD7B		BRCA	7	3	2	886	0.000879952	84.381	2.4977	6.37299
DNAH1	ZNF518B		BRCA	7	3	2	886	0.000879952	84.381	2.4977	6.37299
PLXND1	TNS1		BRCA	3	7	2	886	0.000879952	84.381	2.4977	6.37299
CNTNAP3B	KCNA4		BRCA	7	3	2	886	0.000879952	84.381	2.4977	6.37299
TP53BP1	RBM14	+	BRCA	7	3	2	886	0.000879952	84.381	2.4977	6.37299
TP53BP1	EIF4ENIF1	+	BRCA	7	3	2	886	0.000879952	84.381	2.4977	6.37299
CDC27	TP53BP1	+	BRCA	3	7	2	886	0.000879952	84.381	2.4977	6.37299
ZFPM2	PMEL		BRCA	7	3	2	886	0.000879952	84.381	2.4977	6.37299
ZFPM2	ABCB1		BRCA	7	3	2	886	0.000879952	84.381	2.4977	6.37299
LOXHD1	GNL3L		BRCA	7	3	2	886	0.000879952	84.381	2.4977	6.37299
KIF16B	NCKAP5		BRCA	7	3	2	886	0.000879952	84.381	2.4977	6.37299
MAP4K1	KIF26A		BRCA	7	3	2	886	0.000879952	84.381	2.4977	6.37299
CROCC	ZNF642		BRCA	7	3	2	886	0.000879952	84.381	2.4977	6.37299
CROCC	KIF20B		BRCA	7	3	2	886	0.000879952	84.381	2.4977	6.37299
PIPSL	DICER1		BRCA	7	3	2	886	0.000879952	84.381	2.4977	6.37299
ODZ4	CCDC27		BRCA	7	3	2	886	0.000879952	84.381	2.4977	6.37299
ODZ4	CCDC39		BRCA	7	3	2	886	0.000879952	84.381	2.4977	6.37299
MTM1	RRNAD1		BRCA	7	3	2	886	0.000879952	84.381	2.4977	6.37299
CEP290	COL22A1		BRCA	3	7	2	886	0.000879952	84.381	2.4977	6.37299
CECR2	EWSR1	+	BRCA	7	3	2	886	0.000879952	84.381	2.4977	6.37299
ZNF544	ABCA9		BRCA	3	7	2	886	0.000879952	84.381	2.4977	6.37299
ADAM6	ADAMTS1		STAD	37.5	0.5	5.5	123.5	0.00088733	36.2267	0.67171	6.50788
PLCB1	FEZF1		HNSC	8	3	3	262	0.000890589	32.75	1.74078	5.23702
DPYD	PLCB1		HNSC	3	8	3	262	0.000890589	32.75	1.74078	5.23702
LOC220729	BCLAF1		HNSC	8	3	3	262	0.000890589	32.75	1.74078	5.23702
BRWD3	HLA-B	+	HNSC	8	3	3	262	0.000890589	32.75	1.74078	5.23702
WDR7	TSIX		HNSC	3	8	3	262	0.000890589	32.75	1.74078	5.23702
PTPRM	GPR112		HNSC	3	8	3	262	0.000890589	32.75	1.74078	5.23702
EPHA7	C1orf125		HNSC	8	3	3	262	0.000890589	32.75	1.74078	5.23702
HYDIN	PIK3C2B		HNSC	8	3	3	262	0.000890589	32.75	1.74078	5.23702
SATB2	DCC		HNSC	3	8	3	262	0.000890589	32.75	1.74078	5.23702
MCF2	FAM47C		HNSC	3	8	3	262	0.000890589	32.75	1.74078	5.23702
KYNU	CSMD2		HNSC	3	8	3	262	0.000890589	32.75	1.74078	5.23702
KEAP1	HEATR7B2		HNSC	8	3	3	262	0.000890589	32.75	1.74078	5.23702
ZNF423	GRM1		HNSC	3	8	3	262	0.000890589	32.75	1.74078	5.23702
THSD7B	PCDHA2		HNSC	8	3	3	262	0.000890589	32.75	1.74078	5.23702
POLQ	MEFV		HNSC	8	3	3	262	0.000890589	32.75	1.74078	5.23702
DRP2	GPR112		HNSC	3	8	3	262	0.000890589	32.75	1.74078	5.23702
SFRP4	PLCB1		HNSC	3	8	3	262	0.000890589	32.75	1.74078	5.23702
OR2T1	THSD7B		HNSC	3	8	3	262	0.000890589	32.75	1.74078	5.23702
LTBP1	PC		HNSC	8	3	3	262	0.000890589	32.75	1.74078	5.23702
ASXL3	GK2	+	HNSC	8	3	3	262	0.000890589	32.75	1.74078	5.23702
ANKRD30B	FAM47C		HNSC	3	8	3	262	0.000890589	32.75	1.74078	5.23702
DACH2	AFF2		STAD	3	4	3	155	0.000900098	38.75	1.77398	5.54028
KCNB2	AFF2		STAD	3	4	3	155	0.000900098	38.75	1.77398	5.54028
HGF	PPP1R3A		STAD	3	4	3	155	0.000900098	38.75	1.77398	5.54028
ERBB2	AFF2		STAD	3	4	3	155	0.000900098	38.75	1.77398	5.54028
DOCK4	PTPRZ1		STAD	3	4	3	155	0.000900098	38.75	1.77398	5.54028
DOCK4	LRRIQ1		STAD	3	4	3	155	0.000900098	38.75	1.77398	5.54028
ADAMTS5	CDH11		STAD	3	4	3	155	0.000900098	38.75	1.77398	5.54028
ROS1	GRM8		STAD	3	4	3	155	0.000900098	38.75	1.77398	5.54028
TPO	ADCY2		STAD	4	3	3	155	0.000900098	38.75	1.77398	5.54028
HSD17B7P2	CDH18		STAD	4	3	3	155	0.000900098	38.75	1.77398	5.54028
PASD1	EPHA6		STAD	3	4	3	155	0.000900098	38.75	1.77398	5.54028
NELL1	ADAMTS5		STAD	4	3	3	155	0.000900098	38.75	1.77398	5.54028
ADAMTS12	KCNB2		STAD	4	3	3	155	0.000900098	38.75	1.77398	5.54028
ALMS1	SCN10A		STAD	3	4	3	155	0.000900098	38.75	1.77398	5.54028
ALMS1	WBSCR17		STAD	3	4	3	155	0.000900098	38.75	1.77398	5.54028
PCDHA1	PDE4DIP		STAD	3	4	3	155	0.000900098	38.75	1.77398	5.54028
CYP7B1	ADAMTS12		STAD	3	4	3	155	0.000900098	38.75	1.77398	5.54028
CNTNAP5	KCNMB2		STAD	4	3	3	155	0.000900098	38.75	1.77398	5.54028
CD163L1	KCNMB2		STAD	4	3	3	155	0.000900098	38.75	1.77398	5.54028
PDZRN4	PTPRZ1		STAD	3	4	3	155	0.000900098	38.75	1.77398	5.54028
ITIH5	BTBD11		STAD	3	4	3	155	0.000900098	38.75	1.77398	5.54028
ZNF43	WBSCR17		STAD	3	4	3	155	0.000900098	38.75	1.77398	5.54028
FBN3	SDHAP2		STAD	3	4	3	155	0.000900098	38.75	1.77398	5.54028
TP53	PIK3CA		COADREAD	103	18	7	58	0.000901744	0.218986	-2.44921	-0.588289
NEB	ITPR2		HNSC	18	3	4	251	0.00091922	18.5926	1.35125	4.49428
MUC16	ZFHX4		BRCA	45	16	6	831	0.000925005	6.925	0.95007	2.92021
MUC4	ENSG00000226232		BRCA	41	6	4	847	0.000929335	13.7724	1.31925	3.92608
WASH3P	LOC96610		STAD	2	20	5	138	0.000933771	17.25	1.14222	4.5534
MST1P2	BRWD3	+	HNSC	30	5	6	235	0.000937704	9.4	0.994521	3.4869
FMN2	WDFY3		KIRC	9	5	3	399	0.000952309	26.6	1.70442	4.8574
PAPPA2	FSTL5		HNSC	15	4	4	253	0.000957247	16.8667	1.34477	4.30591
PIK3CA	COL12A1		COADREAD	19	5	6	156	0.000958075	9.85263	1.00891	3.56657
SYNE1	NLRP7		HNSC	36	2	5	233	0.000967185	16.1806	1.10681	4.46081
FAT3	FLJ43860		BRCA	22	5	3	868	0.000975696	23.6727	1.67171	4.65694
DNAH12	RPGR		BRCA	10	12	3	873	0.000977727	21.825	1.67266	4.49346
USH2A	FAT3		BRCA	25	20	5	848	0.000980162	8.48	1.08007	3.19535
SYNE1	HLA-DRB1		KIRC	11	4	3	398	0.000986498	27.1364	1.68848	4.91327
CACNA1C	SYNE1		KIRC	4	11	3	398	0.000986498	27.1364	1.68848	4.91327
PCDH10	CDK8		HNSC	11	2	3	260	0.000987633	35.4545	1.68004	5.45646
CACNG8	PCDH11X		HNSC	2	11	3	260	0.000987633	35.4545	1.68004	5.45646
HR	ZFHX4		HNSC	2	11	3	260	0.000987633	35.4545	1.68004	5.45646
GPR98	ST6GAL2		HNSC	11	2	3	260	0.000987633	35.4545	1.68004	5.45646
HERC2	MIR527		HNSC	11	2	3	260	0.000987633	35.4545	1.68004	5.45646
HSD17B7P2	STAB2		HNSC	11	2	3	260	0.000987633	35.4545	1.68004	5.45646
DNAH8	EEA1		HNSC	11	2	3	260	0.000987633	35.4545	1.68004	5.45646
DNAH8	ZNF451		HNSC	11	2	3	260	0.000987633	35.4545	1.68004	5.45646
COL6A6	ENPP2		HNSC	11	2	3	260	0.000987633	35.4545	1.68004	5.45646
PIK3CA	COL12A1		COAD	14	2	5	100	0.000993243	17.8571	1.14979	4.61501
SOX9	PCNT		COADREAD	5	3	3	175	0.000997264	35	1.72468	5.38601
COL22A1	ERBB3		COADREAD	5	3	3	175	0.000997264	35	1.72468	5.38601
POSTN	ZNF536		COADREAD	3	5	3	175	0.000997264	35	1.72468	5.38601
FN1	DST		COADREAD	5	3	3	175	0.000997264	35	1.72468	5.38601
LOC96610	SLC5A8		HNSC	31	1	4	240	0.00100579	30.9677	1.2099	5.65599
FRG1B	CNTNAP5		STAD	10	3	4	148	0.00100943	19.7333	1.3541	4.61051
ATR	PEG3		HNSC	11	11	5	249	0.00101122	10.2893	1.11364	3.54857
FAM186A	FOXP1		BRCA	6	4	2	886	0.00102432	73.8333	2.4241	6.17952
GRIK2	CDH12		BRCA	6	4	2	886	0.00102432	73.8333	2.4241	6.17952
CEP192	KIF4A		BRCA	4	6	2	886	0.00102432	73.8333	2.4241	6.17952
CEP192	SAGE1		BRCA	4	6	2	886	0.00102432	73.8333	2.4241	6.17952
LRP4	SLC4A3		BRCA	6	4	2	886	0.00102432	73.8333	2.4241	6.17952
CPS1	ZNF99		BRCA	6	4	2	886	0.00102432	73.8333	2.4241	6.17952
FAM86B2	EXOC6		BRCA	6	4	2	886	0.00102432	73.8333	2.4241	6.17952
TMCC1	SBF2		BRCA	4	6	2	886	0.00102432	73.8333	2.4241	6.17952
KIAA0195	RBBP6		BRCA	6	4	2	886	0.00102432	73.8333	2.4241	6.17952
HIPK2	KIAA0195		BRCA	4	6	2	886	0.00102432	73.8333	2.4241	6.17952
GPR112	AKAP6		BRCA	6	4	2	886	0.00102432	73.8333	2.4241	6.17952
GPR112	ZBTB40		BRCA	6	4	2	886	0.00102432	73.8333	2.4241	6.17952
TRPM3	ATAD2B	+	BRCA	4	6	2	886	0.00102432	73.8333	2.4241	6.17952
WDR13	LNX1		BRCA	6	4	2	886	0.00102432	73.8333	2.4241	6.17952
TRO	OR5I1		BRCA	4	6	2	886	0.00102432	73.8333	2.4241	6.17952
CBLB	CDH12		BRCA	6	4	2	886	0.00102432	73.8333	2.4241	6.17952
ACTN4	CBLB		BRCA	4	6	2	886	0.00102432	73.8333	2.4241	6.17952
POLA1	CPS1		BRCA	4	6	2	886	0.00102432	73.8333	2.4241	6.17952
LAMB1	PDE4D		BRCA	6	4	2	886	0.00102432	73.8333	2.4241	6.17952
AIM1	IGDCC3		BRCA	6	4	2	886	0.00102432	73.8333	2.4241	6.17952
AIM1	TRIO		BRCA	6	4	2	886	0.00102432	73.8333	2.4241	6.17952
ANKRD36C	MORC1		BRCA	6	4	2	886	0.00102432	73.8333	2.4241	6.17952
BRCA2	ANKRD30A		BRCA	6	4	2	886	0.00102432	73.8333	2.4241	6.17952
SRGAP2	LRP4		BRCA	4	6	2	886	0.00102432	73.8333	2.4241	6.17952
HECTD1	ZC3H13		BRCA	6	4	2	886	0.00102432	73.8333	2.4241	6.17952
TRPC5	NAV1		BRCA	4	6	2	886	0.00102432	73.8333	2.4241	6.17952
DOT1L	CDH9	+	BRCA	4	6	2	886	0.00102432	73.8333	2.4241	6.17952
ZFP64	KCNMA1		BRCA	6	4	2	886	0.00102432	73.8333	2.4241	6.17952
ZFP64	TRO		BRCA	6	4	2	886	0.00102432	73.8333	2.4241	6.17952
ZFP64	PER3		BRCA	6	4	2	886	0.00102432	73.8333	2.4241	6.17952
COL7A1	COL4A2		BRCA	6	4	2	886	0.00102432	73.8333	2.4241	6.17952
DGKI	AIM1		BRCA	4	6	2	886	0.00102432	73.8333	2.4241	6.17952
COL6A3	DGKI		BRCA	6	4	2	886	0.00102432	73.8333	2.4241	6.17952
NHS	FOXP1		BRCA	6	4	2	886	0.00102432	73.8333	2.4241	6.17952
LRRIQ1	MCF2L2		BRCA	6	4	2	886	0.00102432	73.8333	2.4241	6.17952
TRAPPC9	SAGE1		BRCA	4	6	2	886	0.00102432	73.8333	2.4241	6.17952
TRAPPC9	ANKRD36C		BRCA	4	6	2	886	0.00102432	73.8333	2.4241	6.17952
PLXNA2	GRIN2A		BRCA	4	6	2	886	0.00102432	73.8333	2.4241	6.17952
PCDHGA1	ZBTB40		BRCA	6	4	2	886	0.00102432	73.8333	2.4241	6.17952
ITGB4	AKAP13		BRCA	4	6	2	886	0.00102432	73.8333	2.4241	6.17952
ITGB4	COL7A1		BRCA	4	6	2	886	0.00102432	73.8333	2.4241	6.17952
CASP8	SRRT		BRCA	6	4	2	886	0.00102432	73.8333	2.4241	6.17952
FNDC1	GPC5		BRCA	6	4	2	886	0.00102432	73.8333	2.4241	6.17952
BAI1	ITGB4		BRCA	6	4	2	886	0.00102432	73.8333	2.4241	6.17952
TDRD6	TBC1D8B	+	BRCA	4	6	2	886	0.00102432	73.8333	2.4241	6.17952
TANC2	MC1R		BRCA	6	4	2	886	0.00102432	73.8333	2.4241	6.17952
POTEJ	GPR112		BRCA	4	6	2	886	0.00102432	73.8333	2.4241	6.17952
MLL4	C1QTNF5	+	BRCA	4	6	2	886	0.00102432	73.8333	2.4241	6.17952
FHOD3	SEC14L5		BRCA	6	4	2	886	0.00102432	73.8333	2.4241	6.17952
DOCK4	PDE10A		BRCA	6	4	2	886	0.00102432	73.8333	2.4241	6.17952
DOCK4	INPP4B		BRCA	6	4	2	886	0.00102432	73.8333	2.4241	6.17952
VWA3A	SIGLEC1		BRCA	6	4	2	886	0.00102432	73.8333	2.4241	6.17952
VWA3A	POTEJ		BRCA	6	4	2	886	0.00102432	73.8333	2.4241	6.17952
MAST1	NFATC4		BRCA	6	4	2	886	0.00102432	73.8333	2.4241	6.17952
SETX	RRBP1		BRCA	6	4	2	886	0.00102432	73.8333	2.4241	6.17952
LINGO2	MYO16		BRCA	6	4	2	886	0.00102432	73.8333	2.4241	6.17952
KIF1B	SHANK2		BRCA	4	6	2	886	0.00102432	73.8333	2.4241	6.17952
EMR2	CD97		BRCA	6	4	2	886	0.00102432	73.8333	2.4241	6.17952
MYO10	ZNF646		BRCA	6	4	2	886	0.00102432	73.8333	2.4241	6.17952
MYO10	NID1		BRCA	6	4	2	886	0.00102432	73.8333	2.4241	6.17952
ATN1	CCPG1		BRCA	6	4	2	886	0.00102432	73.8333	2.4241	6.17952
MIR4477A	CPS1		BRCA	4	6	2	886	0.00102432	73.8333	2.4241	6.17952
IGFN1	FLJ43860		BRCA	4	6	2	886	0.00102432	73.8333	2.4241	6.17952
RGS22	KIF4A		BRCA	4	6	2	886	0.00102432	73.8333	2.4241	6.17952
PLEC	ARID4B	+	BRCA	4	6	2	886	0.00102432	73.8333	2.4241	6.17952
HLA-J	TLN1		BRCA	4	6	2	886	0.00102432	73.8333	2.4241	6.17952
GPS2	PCDHGA11		BRCA	6	4	2	886	0.00102432	73.8333	2.4241	6.17952
NBAS	XRN1		BRCA	6	4	2	886	0.00102432	73.8333	2.4241	6.17952
ZNF592	PCDH15		BRCA	4	6	2	886	0.00102432	73.8333	2.4241	6.17952
NPAS4	HLA-J		BRCA	6	4	2	886	0.00102432	73.8333	2.4241	6.17952
PCDHGB4	NCOA6		BRCA	4	6	2	886	0.00102432	73.8333	2.4241	6.17952
PCDHGB4	SALL1		BRCA	4	6	2	886	0.00102432	73.8333	2.4241	6.17952
IL1RAPL1	HTT		BRCA	4	6	2	886	0.00102432	73.8333	2.4241	6.17952
MYO3A	NBPF14		BRCA	6	4	2	886	0.00102432	73.8333	2.4241	6.17952
KIF1A	IREB2		BRCA	6	4	2	886	0.00102432	73.8333	2.4241	6.17952
KIF1A	TRAPPC8		BRCA	6	4	2	886	0.00102432	73.8333	2.4241	6.17952
CILP	MAST1		BRCA	4	6	2	886	0.00102432	73.8333	2.4241	6.17952
TTC39A	CDC42BPA		BRCA	4	6	2	886	0.00102432	73.8333	2.4241	6.17952
TTC39A	COL7A1		BRCA	4	6	2	886	0.00102432	73.8333	2.4241	6.17952
AHCTF1	TDRD6	+	BRCA	6	4	2	886	0.00102432	73.8333	2.4241	6.17952
CUL7	BAZ1A	+	BRCA	4	6	2	886	0.00102432	73.8333	2.4241	6.17952
HECTD4	ADAMTSL1		BRCA	17	7	3	871	0.00102861	21.958	1.65396	4.5243
CSMD3	PRB2		HNSC	47	1	5	223	0.00103661	23.7234	0.996466	5.33646
STAG2	ESPNP		GBM	9	3	3	273	0.0010392	30.3333	1.67962	5.14487
KSR2	DSP		GBM	3	9	3	273	0.0010392	30.3333	1.67962	5.14487
AKAP9	PRUNE2		HNSC	13	5	4	254	0.00104259	15.6308	1.32118	4.1773
CSMD3	THSD7B		HNSC	45	4	7	220	0.00104512	8.55556	0.876923	3.41624
XIRP2	CNTN3		STAD	13	2	4	146	0.00104901	22.4615	1.32211	4.9015
GPR98	PCDHA3		STAD	13	2	4	146	0.00104901	22.4615	1.32211	4.9015
IDH1	RP1	+	LGG	150.5	5.5	0.5	48.5	0.00104976	0.0292963	-6.44344	-0.617151
USH2A	UBR4		KIRC	14	3	3	396	0.00105679	28.2857	1.65559	5.02912
EP300	CASP8	+	HNSC	14	18	7	237	0.00105765	6.58333	0.858465	2.91062
SI	ANK2		HNSC	19	6	5	246	0.001062	10.7895	1.10327	3.65387
SACS	ARID2	+	COADREAD	7	2	3	174	0.00107279	37.2857	1.67639	5.56083
SACS	CCBP2		COADREAD	7	2	3	174	0.00107279	37.2857	1.67639	5.56083
DNAJC13	PXDNL		BRCA	5	5	2	886	0.00107473	70.88	2.4004	6.12157
KIF26B	KIAA2018		BRCA	5	5	2	886	0.00107473	70.88	2.4004	6.12157
CACNA1G	PCDHB6		BRCA	5	5	2	886	0.00107473	70.88	2.4004	6.12157
JMJD1C	LMTK2	+	BRCA	5	5	2	886	0.00107473	70.88	2.4004	6.12157
XRRA1	PARP8		BRCA	5	5	2	886	0.00107473	70.88	2.4004	6.12157
BRWD3	XRRA1	+	BRCA	5	5	2	886	0.00107473	70.88	2.4004	6.12157
VWA3B	STAT4		BRCA	5	5	2	886	0.00107473	70.88	2.4004	6.12157
BPTF	TRPM5	+	BRCA	5	5	2	886	0.00107473	70.88	2.4004	6.12157
RGPD3	KIF26B		BRCA	5	5	2	886	0.00107473	70.88	2.4004	6.12157
NYNRIN	GPRASP2		BRCA	5	5	2	886	0.00107473	70.88	2.4004	6.12157
SEMA6A	NLRP2		BRCA	5	5	2	886	0.00107473	70.88	2.4004	6.12157
MPHOSPH8	DOCK8	+	BRCA	5	5	2	886	0.00107473	70.88	2.4004	6.12157
PTPRZ1	BPTF	+	BRCA	5	5	2	886	0.00107473	70.88	2.4004	6.12157
CREBBP	ABCC9	+	BRCA	5	5	2	886	0.00107473	70.88	2.4004	6.12157
CREBBP	PTPRZ1	+	BRCA	5	5	2	886	0.00107473	70.88	2.4004	6.12157
GLI2	SLC4A4		BRCA	5	5	2	886	0.00107473	70.88	2.4004	6.12157
ODF2	KCNT2		BRCA	5	5	2	886	0.00107473	70.88	2.4004	6.12157
CHD3	SVIL	+	BRCA	5	5	2	886	0.00107473	70.88	2.4004	6.12157
PRIC285	FOLH1		BRCA	5	5	2	886	0.00107473	70.88	2.4004	6.12157
PHF3	SCN9A	+	BRCA	5	5	2	886	0.00107473	70.88	2.4004	6.12157
LOXL3	VWA3B		BRCA	5	5	2	886	0.00107473	70.88	2.4004	6.12157
NOTCH3	TRPC7		BRCA	5	5	2	886	0.00107473	70.88	2.4004	6.12157
ABCA10	GLI2		BRCA	5	5	2	886	0.00107473	70.88	2.4004	6.12157
ACLY	SPEG		BRCA	5	5	2	886	0.00107473	70.88	2.4004	6.12157
FARP2	PPEF1		BRCA	5	5	2	886	0.00107473	70.88	2.4004	6.12157
ABI3BP	EP300	+	BRCA	5	5	2	886	0.00107473	70.88	2.4004	6.12157
PRKG2	SVIL		BRCA	5	5	2	886	0.00107473	70.88	2.4004	6.12157
WDR52	ZNF841		BRCA	5	5	2	886	0.00107473	70.88	2.4004	6.12157
WDR52	FCRL5		BRCA	5	5	2	886	0.00107473	70.88	2.4004	6.12157
NLRC4	SVIL		BRCA	5	5	2	886	0.00107473	70.88	2.4004	6.12157
NLRC4	CHD3	+	BRCA	5	5	2	886	0.00107473	70.88	2.4004	6.12157
SLC24A4	FER1L6		BRCA	5	5	2	886	0.00107473	70.88	2.4004	6.12157
C10orf12	HIVEP1		BRCA	5	5	2	886	0.00107473	70.88	2.4004	6.12157
ARFGEF1	TNKS1BP1		BRCA	5	5	2	886	0.00107473	70.88	2.4004	6.12157
ARFGEF1	C10orf12		BRCA	5	5	2	886	0.00107473	70.88	2.4004	6.12157
RTN4	SETD2	+	BRCA	5	5	2	886	0.00107473	70.88	2.4004	6.12157
PLXNB3	LARP4B		BRCA	5	5	2	886	0.00107473	70.88	2.4004	6.12157
AP1G2	SVIL		BRCA	5	5	2	886	0.00107473	70.88	2.4004	6.12157
MYO15A	LMTK2		BRCA	5	5	2	886	0.00107473	70.88	2.4004	6.12157
MYO15A	ZNF536		BRCA	5	5	2	886	0.00107473	70.88	2.4004	6.12157
LAMA3	NINL		BRCA	5	5	2	886	0.00107473	70.88	2.4004	6.12157
LAMA3	NYNRIN		BRCA	5	5	2	886	0.00107473	70.88	2.4004	6.12157
CXorf22	EPG5		BRCA	5	5	2	886	0.00107473	70.88	2.4004	6.12157
ACVR2A	EFCAB5		BRCA	5	5	2	886	0.00107473	70.88	2.4004	6.12157
ZNF804B	ANKAR		BRCA	5	5	2	886	0.00107473	70.88	2.4004	6.12157
GOLGA3	DMXL1		BRCA	5	5	2	886	0.00107473	70.88	2.4004	6.12157
MUC5B	KIAA2018		BRCA	27	4	3	864	0.00107808	24	1.63285	4.72326
KCNT2	OR5L2		STAD	6	2	3	154	0.00107996	38.5	1.6843	5.61701
KCNT2	LAMA3		STAD	6	2	3	154	0.00107996	38.5	1.6843	5.61701
MAP2	ATRNL1		STAD	6	2	3	154	0.00107996	38.5	1.6843	5.61701
TMEM132D	ZNF347		STAD	6	2	3	154	0.00107996	38.5	1.6843	5.61701
OR5T2	TMEM132D		STAD	2	6	3	154	0.00107996	38.5	1.6843	5.61701
PAPPA	ZNF85		STAD	6	2	3	154	0.00107996	38.5	1.6843	5.61701
MYO3A	TIAM2		STAD	6	2	3	154	0.00107996	38.5	1.6843	5.61701
APOB	TCEB3C		STAD	6	2	3	154	0.00107996	38.5	1.6843	5.61701
SNTG2	MAP2		STAD	2	6	3	154	0.00107996	38.5	1.6843	5.61701
ZNF536	OR5T2		STAD	6	2	3	154	0.00107996	38.5	1.6843	5.61701
ZNF536	NDST4		STAD	6	2	3	154	0.00107996	38.5	1.6843	5.61701
DPYD	ZNF536		STAD	2	6	3	154	0.00107996	38.5	1.6843	5.61701
ZNF804A	ZNF536		STAD	2	6	3	154	0.00107996	38.5	1.6843	5.61701
ANKRD30A	EGFLAM		STAD	6	2	3	154	0.00107996	38.5	1.6843	5.61701
DCHS2	ATRNL1		STAD	6	2	3	154	0.00107996	38.5	1.6843	5.61701
RYR1	GABBR1		STAD	6	2	3	154	0.00107996	38.5	1.6843	5.61701
ZEB2	AUTS2		STAD	6	2	3	154	0.00107996	38.5	1.6843	5.61701
VCAN	TMC2		STAD	6	2	3	154	0.00107996	38.5	1.6843	5.61701
VCAN	PRAMEF11		STAD	6	2	3	154	0.00107996	38.5	1.6843	5.61701
VCAN	POP1		STAD	6	2	3	154	0.00107996	38.5	1.6843	5.61701
RSF1	FAT2	+	STAD	2	6	3	154	0.00107996	38.5	1.6843	5.61701
ZFPM2	NDST4		STAD	6	2	3	154	0.00107996	38.5	1.6843	5.61701
TTN	POTEE		GBM	70.5	0.5	5.5	213.5	0.00108244	33.3121	0.598316	6.41352
CACNA1E	SLITRK1		COADREAD	4	4	3	175	0.00108625	32.8125	1.69546	5.28616
GPC6	SORCS1		COADREAD	4	4	3	175	0.00108625	32.8125	1.69546	5.28616
GPC6	PCDH17		COADREAD	4	4	3	175	0.00108625	32.8125	1.69546	5.28616
ACVR1B	CADPS		COADREAD	4	4	3	175	0.00108625	32.8125	1.69546	5.28616
ELF3	SORCS1		COADREAD	4	4	3	175	0.00108625	32.8125	1.69546	5.28616
TTN	EPB41L3		PRAD	31	2	5	197	0.0010902	15.8871	1.08249	4.44852
NASP	RBMX	+	BRCA	3	8	2	885	0.00109748	73.75	2.38082	6.22054
SCN10A	PUM1		BRCA	8	3	2	885	0.00109748	73.75	2.38082	6.22054
CACNA1B	PSMC4		BRCA	8	3	2	885	0.00109748	73.75	2.38082	6.22054
CPXM1	PEG3		BRCA	3	8	2	885	0.00109748	73.75	2.38082	6.22054
PLCZ1	SCN10A		BRCA	3	8	2	885	0.00109748	73.75	2.38082	6.22054
EPB41L3	RBMX		BRCA	3	8	2	885	0.00109748	73.75	2.38082	6.22054
KIAA0947	RRNAD1		BRCA	8	3	2	885	0.00109748	73.75	2.38082	6.22054
HJURP	SCN10A	+	BRCA	3	8	2	885	0.00109748	73.75	2.38082	6.22054
WDR17	LEPR		BRCA	8	3	2	885	0.00109748	73.75	2.38082	6.22054
NWD1	ABCA12		BRCA	8	3	2	885	0.00109748	73.75	2.38082	6.22054
BAZ2B	LINC00283	+	BRCA	8	3	2	885	0.00109748	73.75	2.38082	6.22054
BAZ2B	HOOK2	+	BRCA	8	3	2	885	0.00109748	73.75	2.38082	6.22054
CSMD3	UNC80		BRCA	8	3	2	885	0.00109748	73.75	2.38082	6.22054
PIK3C2G	ADAM21P1		BRCA	3	8	2	885	0.00109748	73.75	2.38082	6.22054
NEURL4	MYH7		BRCA	3	8	2	885	0.00109748	73.75	2.38082	6.22054
FSIP2	OR4F17		BRCA	8	3	2	885	0.00109748	73.75	2.38082	6.22054
SMG1	URB2		BRCA	8	3	2	885	0.00109748	73.75	2.38082	6.22054
CENPE	NLRP12		BRCA	8	3	2	885	0.00109748	73.75	2.38082	6.22054
SMCR8	FRMPD4		BRCA	3	8	2	885	0.00109748	73.75	2.38082	6.22054
KIAA0430	SLCO1B3		BRCA	8	3	2	885	0.00109748	73.75	2.38082	6.22054
KIAA0430	CPXM1		BRCA	8	3	2	885	0.00109748	73.75	2.38082	6.22054
NOTCH1	KIAA0430		BRCA	3	8	2	885	0.00109748	73.75	2.38082	6.22054
POM121	FRYL		BRCA	8	3	2	885	0.00109748	73.75	2.38082	6.22054
USP9X	COMP		BRCA	8	3	2	885	0.00109748	73.75	2.38082	6.22054
WDFY4	CDKL5		BRCA	8	3	2	885	0.00109748	73.75	2.38082	6.22054
WDFY4	RPS6KA2		BRCA	8	3	2	885	0.00109748	73.75	2.38082	6.22054
COL12A1	CDK19		BRCA	8	3	2	885	0.00109748	73.75	2.38082	6.22054
COL12A1	DHX37		BRCA	8	3	2	885	0.00109748	73.75	2.38082	6.22054
SLC15A5	SCN10A		BRCA	3	8	2	885	0.00109748	73.75	2.38082	6.22054
ENSG00000226232	VPRBP		BRCA	8	3	2	885	0.00109748	73.75	2.38082	6.22054
CIT	VAV3		BRCA	8	3	2	885	0.00109748	73.75	2.38082	6.22054
PCDHA11	GON4L		BRCA	3	8	2	885	0.00109748	73.75	2.38082	6.22054
FRAS1	ABCA12		BRCA	8	3	2	885	0.00109748	73.75	2.38082	6.22054
FRAS1	PMS1		BRCA	8	3	2	885	0.00109748	73.75	2.38082	6.22054
FRAS1	CPXM1		BRCA	8	3	2	885	0.00109748	73.75	2.38082	6.22054
ANGPT4	FRAS1		BRCA	3	8	2	885	0.00109748	73.75	2.38082	6.22054
MYH7B	SLITRK3		BRCA	8	3	2	885	0.00109748	73.75	2.38082	6.22054
MYH7B	HJURP	+	BRCA	8	3	2	885	0.00109748	73.75	2.38082	6.22054
MYH7B	SLC27A4		BRCA	8	3	2	885	0.00109748	73.75	2.38082	6.22054
KCNN3	IL13RA2		BRCA	8	3	2	885	0.00109748	73.75	2.38082	6.22054
BIRC6	HLA-C		BRCA	8	3	2	885	0.00109748	73.75	2.38082	6.22054
RP1	CCDC87		BRCA	8	3	2	885	0.00109748	73.75	2.38082	6.22054
HSPG2	ZCCHC6		BRCA	8	3	2	885	0.00109748	73.75	2.38082	6.22054
HSPG2	BMP2K		BRCA	8	3	2	885	0.00109748	73.75	2.38082	6.22054
HSPG2	PIK3CB		BRCA	8	3	2	885	0.00109748	73.75	2.38082	6.22054
ANK2	F13B		BRCA	8	3	2	885	0.00109748	73.75	2.38082	6.22054
ANK2	WASH6P		BRCA	8	3	2	885	0.00109748	73.75	2.38082	6.22054
ANK2	TCP10		BRCA	8	3	2	885	0.00109748	73.75	2.38082	6.22054
ANK2	CDYL	+	BRCA	8	3	2	885	0.00109748	73.75	2.38082	6.22054
PKHD1	PSG1		BRCA	8	3	2	885	0.00109748	73.75	2.38082	6.22054
BMPR2	PKHD1		BRCA	3	8	2	885	0.00109748	73.75	2.38082	6.22054
GREB1L	ABCA12		BRCA	8	3	2	885	0.00109748	73.75	2.38082	6.22054
CASZ1	SEC14L6		BRCA	8	3	2	885	0.00109748	73.75	2.38082	6.22054
CASZ1	BAP1		BRCA	8	3	2	885	0.00109748	73.75	2.38082	6.22054
DNAH6	C15orf39		BRCA	8	3	2	885	0.00109748	73.75	2.38082	6.22054
FLNC	RRNAD1		BRCA	8	3	2	885	0.00109748	73.75	2.38082	6.22054
FLNC	NHSL2		BRCA	8	3	2	885	0.00109748	73.75	2.38082	6.22054
CCDC39	PDE4DIP		BRCA	3	8	2	885	0.00109748	73.75	2.38082	6.22054
PYGB	COL12A1		BRCA	3	8	2	885	0.00109748	73.75	2.38082	6.22054
KDM6A	SAMD9	+	BRCA	8	3	2	885	0.00109748	73.75	2.38082	6.22054
KDM6A	ADCY8	+	BRCA	8	3	2	885	0.00109748	73.75	2.38082	6.22054
CHD4	MCM3AP	+	BRCA	8	3	2	885	0.00109748	73.75	2.38082	6.22054
CHD4	BRD8	+	BRCA	8	3	2	885	0.00109748	73.75	2.38082	6.22054
CHD4	MAP3K12	+	BRCA	8	3	2	885	0.00109748	73.75	2.38082	6.22054
CHD4	EPC1	+	BRCA	8	3	2	885	0.00109748	73.75	2.38082	6.22054
CAD	KRT1		BRCA	8	3	2	885	0.00109748	73.75	2.38082	6.22054
C15orf55	PKD1L1		BRCA	3	8	2	885	0.00109748	73.75	2.38082	6.22054
C15orf55	CR1		BRCA	3	8	2	885	0.00109748	73.75	2.38082	6.22054
CPAMD8	FASTKD2		BRCA	8	3	2	885	0.00109748	73.75	2.38082	6.22054
DCC	MIB1		BRCA	8	3	2	885	0.00109748	73.75	2.38082	6.22054
DCC	GRIK5		BRCA	8	3	2	885	0.00109748	73.75	2.38082	6.22054
DCC	PRB2		BRCA	8	3	2	885	0.00109748	73.75	2.38082	6.22054
DCC	HTATSF1		BRCA	8	3	2	885	0.00109748	73.75	2.38082	6.22054
MEGF8	PRPF4B		BRCA	8	3	2	885	0.00109748	73.75	2.38082	6.22054
MEGF8	ZC3H12A		BRCA	8	3	2	885	0.00109748	73.75	2.38082	6.22054
MEGF8	IQSEC1		BRCA	8	3	2	885	0.00109748	73.75	2.38082	6.22054
GPR179	BAZ2B	+	BRCA	3	8	2	885	0.00109748	73.75	2.38082	6.22054
ADAMTSL1	CCDC88C		BRCA	8	3	2	885	0.00109748	73.75	2.38082	6.22054
ADAMTSL1	COL4A4		BRCA	8	3	2	885	0.00109748	73.75	2.38082	6.22054
ADAMTSL1	CPNE4		BRCA	8	3	2	885	0.00109748	73.75	2.38082	6.22054
TNRC6B	TAOK1		BRCA	8	3	2	885	0.00109748	73.75	2.38082	6.22054
AKAP4	WDR17		BRCA	3	8	2	885	0.00109748	73.75	2.38082	6.22054
AKAP4	FLNC		BRCA	3	8	2	885	0.00109748	73.75	2.38082	6.22054
DZANK1	RBMX		BRCA	3	8	2	885	0.00109748	73.75	2.38082	6.22054
DNAH5	LARP7		BRCA	8	3	2	885	0.00109748	73.75	2.38082	6.22054
ARHGAP31	RP1		BRCA	3	8	2	885	0.00109748	73.75	2.38082	6.22054
ARHGAP31	DNAH5		BRCA	3	8	2	885	0.00109748	73.75	2.38082	6.22054
SCN7A	DLGAP2		BRCA	8	3	2	885	0.00109748	73.75	2.38082	6.22054
SCN7A	ZNF217		BRCA	8	3	2	885	0.00109748	73.75	2.38082	6.22054
DUSP27	ARID1B		BRCA	3	8	2	885	0.00109748	73.75	2.38082	6.22054
TMEM247	BMP2K		BRCA	8	3	2	885	0.00109748	73.75	2.38082	6.22054
SPTB	TRPC6		BRCA	8	3	2	885	0.00109748	73.75	2.38082	6.22054
SPTB	IQSEC1		BRCA	8	3	2	885	0.00109748	73.75	2.38082	6.22054
MUC4	RPS6KA1		BRCA	42	2	3	851	0.00109815	30.3929	1.59836	5.23006
LRP1	MYH2		GBM	6	5	3	274	0.0011023	27.4	1.66642	4.95467
RELN	PRKD1		HNSC	19	3	4	250	0.00110242	17.5439	1.29675	4.43266
LRP1B	FAM135B		COAD	9	2	4	106	0.00111153	23.5556	1.33062	4.9881
MYH6	SPTA1		HNSC	4	7	3	262	0.00112097	28.0714	1.66012	5.00939
RC3H1	DIP2A		HNSC	4	7	3	262	0.00112097	28.0714	1.66012	5.00939
ITGA8	FRAS1		HNSC	7	4	3	262	0.00112097	28.0714	1.66012	5.00939
ITGA8	ITPR2		HNSC	7	4	3	262	0.00112097	28.0714	1.66012	5.00939
KCNT2	COL3A1		HNSC	7	4	3	262	0.00112097	28.0714	1.66012	5.00939
PSIP1	GOLGA6L5	+	HNSC	4	7	3	262	0.00112097	28.0714	1.66012	5.00939
NBEA	C6		HNSC	4	7	3	262	0.00112097	28.0714	1.66012	5.00939
BRCA2	PSIP1	+	HNSC	7	4	3	262	0.00112097	28.0714	1.66012	5.00939
PCNT	HECTD1		HNSC	7	4	3	262	0.00112097	28.0714	1.66012	5.00939
PRB3	DOCK2		HNSC	4	7	3	262	0.00112097	28.0714	1.66012	5.00939
BIRC6	ZNF521		HNSC	7	4	3	262	0.00112097	28.0714	1.66012	5.00939
WHSC1	FUT9	+	HNSC	7	4	3	262	0.00112097	28.0714	1.66012	5.00939
WHSC1	COL24A1	+	HNSC	7	4	3	262	0.00112097	28.0714	1.66012	5.00939
WHSC1	PDE4DIP	+	HNSC	7	4	3	262	0.00112097	28.0714	1.66012	5.00939
PPP1R9A	TNN		HNSC	4	7	3	262	0.00112097	28.0714	1.66012	5.00939
ABCC8	PCDHB8		HNSC	7	4	3	262	0.00112097	28.0714	1.66012	5.00939
ABCC8	SIGLEC1		HNSC	7	4	3	262	0.00112097	28.0714	1.66012	5.00939
LOC651250	PCDHA13		HNSC	4	7	3	262	0.00112097	28.0714	1.66012	5.00939
LOC651250	MGAM		HNSC	4	7	3	262	0.00112097	28.0714	1.66012	5.00939
RIF1	GRID2		HNSC	4	7	3	262	0.00112097	28.0714	1.66012	5.00939
ZEB2	GRID2		HNSC	4	7	3	262	0.00112097	28.0714	1.66012	5.00939
LOC642846	MGAM		HNSC	4	7	3	262	0.00112097	28.0714	1.66012	5.00939
MAP3K1	PIK3CA		BRCA	32	247	32	587	0.00113121	2.37652	0.353584	1.37769
PCDH10	TSIX		HNSC	10	7	4	255	0.00113177	14.5714	1.29761	4.06052
TP53	LRP1B		Lung Adenocarcinoma	48	3	12	96	0.00113711	8	0.767681	3.3912
CDHR5	QSER1		KIRC	3	3	2	408	0.00114175	90.6667	2.38793	6.62645
CDHR5	SLCO4C1		KIRC	3	3	2	408	0.00114175	90.6667	2.38793	6.62645
SPAG17	KIF1A		KIRC	3	3	2	408	0.00114175	90.6667	2.38793	6.62645
TRIOBP	XIST		KIRC	3	3	2	408	0.00114175	90.6667	2.38793	6.62645
SUZ12	BDP1		KIRC	3	3	2	408	0.00114175	90.6667	2.38793	6.62645
SUZ12	PRIM2		KIRC	3	3	2	408	0.00114175	90.6667	2.38793	6.62645
EXPH5	CLTCL1		KIRC	3	3	2	408	0.00114175	90.6667	2.38793	6.62645
ASCC3	USP34		KIRC	3	3	2	408	0.00114175	90.6667	2.38793	6.62645
ASCC3	ZFAT		KIRC	3	3	2	408	0.00114175	90.6667	2.38793	6.62645
FAM59A	SPTAN1		KIRC	3	3	2	408	0.00114175	90.6667	2.38793	6.62645
FAM59A	MCM3AP		KIRC	3	3	2	408	0.00114175	90.6667	2.38793	6.62645
PRX	ZBBX		KIRC	3	3	2	408	0.00114175	90.6667	2.38793	6.62645
GBF1	NUP160		KIRC	3	3	2	408	0.00114175	90.6667	2.38793	6.62645
GALNT7	BLM		KIRC	3	3	2	408	0.00114175	90.6667	2.38793	6.62645
ZFR2	SLCO4C1		KIRC	3	3	2	408	0.00114175	90.6667	2.38793	6.62645
SLC17A6	SPTAN1		KIRC	3	3	2	408	0.00114175	90.6667	2.38793	6.62645
POLR3B	XIST		KIRC	3	3	2	408	0.00114175	90.6667	2.38793	6.62645
POLR3B	SLC27A6		KIRC	3	3	2	408	0.00114175	90.6667	2.38793	6.62645
FRMPD1	TGM5		KIRC	3	3	2	408	0.00114175	90.6667	2.38793	6.62645
MOCOS	ZFR2		KIRC	3	3	2	408	0.00114175	90.6667	2.38793	6.62645
HCFC1	CACNA1A		KIRC	3	3	2	408	0.00114175	90.6667	2.38793	6.62645
ZFP112	LOC646214		KIRC	3	3	2	408	0.00114175	90.6667	2.38793	6.62645
ATP1A1	EPHB6		KIRC	3	3	2	408	0.00114175	90.6667	2.38793	6.62645
FREM1	MLL5	+	KIRC	3	3	2	408	0.00114175	90.6667	2.38793	6.62645
MTUS1	TFDP2		KIRC	3	3	2	408	0.00114175	90.6667	2.38793	6.62645
ARHGAP31	JMJD1C	+	KIRC	3	3	2	408	0.00114175	90.6667	2.38793	6.62645
PCNX	PRIM2		KIRC	3	3	2	408	0.00114175	90.6667	2.38793	6.62645
PCNX	SUZ12		KIRC	3	3	2	408	0.00114175	90.6667	2.38793	6.62645
NUP210L	DOCK2		KIRC	3	3	2	408	0.00114175	90.6667	2.38793	6.62645
NUP210L	NBR1		KIRC	3	3	2	408	0.00114175	90.6667	2.38793	6.62645
ADCY8	PLEKHH2		KIRC	3	3	2	408	0.00114175	90.6667	2.38793	6.62645
KIAA0368	SETX		KIRC	3	3	2	408	0.00114175	90.6667	2.38793	6.62645
ATR	SPAG17		KIRC	3	3	2	408	0.00114175	90.6667	2.38793	6.62645
UBE4B	ZC3H18		KIRC	3	3	2	408	0.00114175	90.6667	2.38793	6.62645
NOTCH1	PRB1		KIRC	3	3	2	408	0.00114175	90.6667	2.38793	6.62645
RIMBP2	CLTCL1		KIRC	3	3	2	408	0.00114175	90.6667	2.38793	6.62645
EEA1	ATF7IP		KIRC	3	3	2	408	0.00114175	90.6667	2.38793	6.62645
LRP1B	HCN1		STAD	21	2	5	137	0.00114271	16.3095	1.08878	4.49472
LRP1B	BNC2		STAD	21	2	5	137	0.00114271	16.3095	1.08878	4.49472
COL22A1	VCAN		COAD	4	2	3	112	0.0011542	42	1.68925	5.78609
RELN	PLXNA4		COAD	4	2	3	112	0.0011542	42	1.68925	5.78609
MLL2	CNOT1	+	HNSC	42	3	6	225	0.00115449	10.7143	0.947029	3.79613
RUNX1	FLT3		LAML	16	55	1	64	0.0011612	0.0727273	-4.67325	-0.568827
MAP2	BAI3		STAD	5	7	4	149	0.00116847	17.0286	1.31723	4.35256
ZNF536	CNTN6		STAD	5	7	4	149	0.00116847	17.0286	1.31723	4.35256
TTN	MYLK		OV	55	1	5	251	0.00116853	22.8182	0.960746	5.29437
ZNF804B	TLR4		STAD	7	9	5	144	0.00117705	11.4286	1.10546	3.76677
RYR3	PREX2		STAD	7	9	5	144	0.00117705	11.4286	1.10546	3.76677
COL14A1	MPDZ		HNSC	9	3	3	261	0.00117748	29	1.63449	5.10011
FCGBP	CACNA2D1		HNSC	9	3	3	261	0.00117748	29	1.63449	5.10011
FCGBP	PCDHB12		HNSC	9	3	3	261	0.00117748	29	1.63449	5.10011
VCAN	COL5A2		HNSC	9	3	3	261	0.00117748	29	1.63449	5.10011
NRXN1	DGKK		HNSC	9	3	3	261	0.00117748	29	1.63449	5.10011
AHNAK	KYNU		HNSC	9	3	3	261	0.00117748	29	1.63449	5.10011
ABCA13	ATP2B3		HNSC	9	3	3	261	0.00117748	29	1.63449	5.10011
NDST4	CDH9		HNSC	3	9	3	261	0.00117748	29	1.63449	5.10011
TUBBP5	KIAA1217		HNSC	9	3	3	261	0.00117748	29	1.63449	5.10011
ZNF99	TLN2		HNSC	9	3	3	261	0.00117748	29	1.63449	5.10011
AHNAK2	DDC		HNSC	9	3	3	261	0.00117748	29	1.63449	5.10011
AHNAK2	ZNF845		HNSC	9	3	3	261	0.00117748	29	1.63449	5.10011
[truncated: 69,469 more rows]

## Sheet: ATRX-IDH1-TP53-EGFR-PTEN
GENE 1	GENE 2	Patient Cohort *	Samples mutated in GENE1 and not GENE2	Samples mutated in GENE2 and not GENE1	Samples mutated in GENE1 and GENE2	Samples mutated neither in GENE1 nor in GENE2	Fisher p value	Odds ratio	Confidence Interval Minimum	Confidence Interval Maximum
IDH1	ATRX	GBM	3	4	12	269	1.48e-15	269	3.98	7.2
TP53	IDH1	GBM	67.5	0.5	15.5	206.5	2.43e-09	94.84	1.72	7.38
TP53	ATRX	LGG	25	4	76	98	1.95e-28	74.48	3.21	5.41
PTEN	EGFR	LGG	5	11	5	182	0.0003	16.55	1.43	4.19
IDH1	ATRX	LGG	75	5	75	48	6.95e-08	9.6	1.29	3.24
TP53	ATRX	GBM	70	4	12	202	9.6e-05	8.66	0.99	3.32
TP53	IDH1	LGG	9	58	92	44	2.23e-08	7.76	1.26	2.84
PTEN	ATRX	GBM	88	15	1	184	0.03	0.14	-4.01	0.07
EGFR	TP53	GBM	13	32	1	39	0.007	0.09	-4.45	-0.28
ATRX	PTEN	LGG	80.5	10.5	0.5	113.5	0.007	0.07	-5.55	0.15
PTEN	IDH1	GBM	89.5	15.5	0.5	184.5	0.007	0.07	-5.54	0.12
TP53	EGFR	LGG	100	15	1	87	0.0003	0.06	-4.89	-0.8
TP53	PTEN	LGG	101.5	10.5	0.5	92.5	0.002	0.04	-5.99	-0.29
ATRX	EGFR	LGG	80.5	16.5	0.5	107.5	0.0003	0.04	-6.04	-0.38
IDH1	EGFR	LGG	149	15	1	38	4.4e-09	0.02	-6.13	-2.02
IDH1	PTEN	LGG	150.5	10.5	0.5	43.5	7.46e-07	0.01	-7.14	-1.43
ATRX	CIC	LGG	78	33	2	90	2.01e-06	0.07	-4.12	-1.2
